# Supplementary material for: Naturally Occurring 8ß,13ß-kaur-15-en-17-al and Anti-Malarial Activity from Podocarpus polystachyus Leaves
Source: MDPI journal article supplement (doi:10.3390/ph15070902), 2022-07-21
Supplement: s1 [file s1]

# Supporting information

## **Naturally occurring 8 $\beta$ ,13 $\beta$ -kaur-15-en-17-al and anti-malarial activity from *Podocarpus polystachyus* leaves**

Mira Syahfrien Amir Rawa<sup>a,b,c</sup>, Mohammad G. Al-Thiabat<sup>a</sup>, Toshihiko  
Nogawa<sup>c,d</sup>, Yushi Futamura<sup>e</sup>, Akiko Okano<sup>e</sup>, and Habibah A. Wahab<sup>a,b,c,\*</sup>

<sup>a</sup>*School of Pharmaceutical Sciences, Universiti Sains Malaysia, 11800 Minden, Penang, Malaysia*

<sup>b</sup>*Collaborative Laboratory of Herbal Standardization (CHEST), School of Pharmaceutical Sciences, Universiti Sains Malaysia, 11900 Bayan Lepas, Malaysia*

<sup>c</sup>*USM-RIKEN Interdisciplinary Collaboration for Advanced Science (URICAS), Universiti Sains Malaysia, 11800 Minden, Penang Malaysia*

<sup>d</sup>*Molecular Structure Characterization Unit, Technology Platform Division, RIKEN Center for Sustainable Resource Science, 2-1 Hirosawa, Saitama 351-0198, Japan*

<sup>e</sup>*Chemical Biology Research Group, RIKEN Center for Sustainable Resource Science, 2-1 Hirosawa, Wako, Saitama 351-0198, Japan*

### Correspondence

Prof. Habibah A. Wahab  
School of Pharmaceutical Sciences, Universiti Sains Malaysia, 11800 Minden, Penang, Malaysia  
Tel: +604-6577888  
Email: [habibahw@usm.my](mailto:habibahw@usm.my)  
Orcid ID: 0000-0002-8353-8679

## Contents:

- Figure S1.** Isolation scheme of the leaves extract from *Podocarpus polystachyus*. / page 4
- Figure S2.** HR-ESI-TOF-MS spectrum of **1**. / page 5
- Figure S3.** HR-ESI-TOF-MS spectrum of **2**. / page 6
- Figure S4.** HR-ESI-TOF-MS spectrum of **3**. / page 7
- Figure S5.** HR-EI-TOF-MS spectrum of **4**. / page 8
- Figure S6.**  $^1\text{H}$  NMR spectrum of **1**. / page 9
- Figure S7.**  $^{13}\text{C}$  NMR spectrum of **1**. / page 10
- Figure S8.** DEPT-135 spectrum of **1**. / page 11
- Figure S9.** HSQC spectrum of **1**. / page 12
- Figure S10.** DQF-COSY spectrum of **1**. / page 13
- Figure S11.** HMBC spectrum of **1**. / page 14
- Figure S12.** NOESY spectrum of **1**. / page 15
- Figure S13.** Conformation analysis and calculation of NMR chemical shifts of 8 $\beta$ ,13 $\beta$ -kaur-15-en-17-al. / page 16
- Figure S14.** Conformation analysis and calculation of ECD spectra of enantiomer of 8 $\beta$ ,13 $\beta$ -kaur-15-en-17-al. / page 17
- Figure S15.** Experimental and calculated ECD spectra of **1**. / page 18
- Figure S16.**  $^1\text{H}$  NMR spectrum of **2**. / page 19
- Figure S17.**  $^{13}\text{C}$  NMR spectrum of **2**. / page 20
- Figure S18.** DEPT-90 and DEPT-135 experiments of **2**. / page 21
- Figure S19.** HSQC spectrum of **2**. / page 22
- Figure S20.** DQF-COSY spectrum of **2**. / page 23
- Figure S21.** HMBC spectrum of **2**. / page 24
- Figure S22.**  $^1\text{H}$  NMR spectrum of **3**. / page 25
- Figure S23.**  $^{13}\text{C}$  NMR spectrum of **3**. / page 26
- Figure S24.** DEPT-135 spectrum of **3**. / page 27
- Figure S25.** HSQC spectrum of **3**. / page 28
- Figure S26.** DQF-COSY spectrum of **3**. / page 29
- Figure S27.** HMBC spectrum of **3**. / page 30
- Figure S28.** NOESY spectrum of **3**. / page 31
- Figure S29.**  $^1\text{H}$  NMR spectrum of **4**. / page 32
- Figure S30.**  $^{13}\text{C}$  NMR spectrum of **4**. / page 33

**Figure S31.** DEPT-135 spectrum of **4**. / page 34

**Figure S32.** HSQC-TOCSY spectrum of **4**. / page 35

**Figure S33.** DQF-COSY spectrum of **4**. / page 36

**Figure S34.** HMBC spectrum of **4**. / page 37

**Figure S35.** NOESY spectrum of **4**. / page 38

**Figure S36.** Superimposition of the crystal structure of 3,5-dihydroxy-2-naphthoic acid (C pink and O red) and the docked model (C green and O red) on Plasmodium falciparum lactate dehydrogenase crystal structure (PDB ID: 1U5A) with RMSD ~ 2.0 Å and their 2D interactions into the binding site. / page 39

**Figure S37.** Hydrogen bond profiles obtained from MD simulations (0–100 ns) for all systems: (a) *Pf*LDH-apo, (b) *Pf*LDH- control, (c) *Pf*LDH-**1**, and (d) *Pf*LDH-**2**. / page 40

**Figure S38.** Specimen ID and sample report of *P. polystachyus*. / page 41

**Table S1.** Infection rates of compounds **1** and **2** in comparison to artemisinin as the reference drug. / page 42

**Table S2.** IC<sub>50</sub> of compounds **1** and **2** in comparison to artemisinin as the reference drug. / page 42

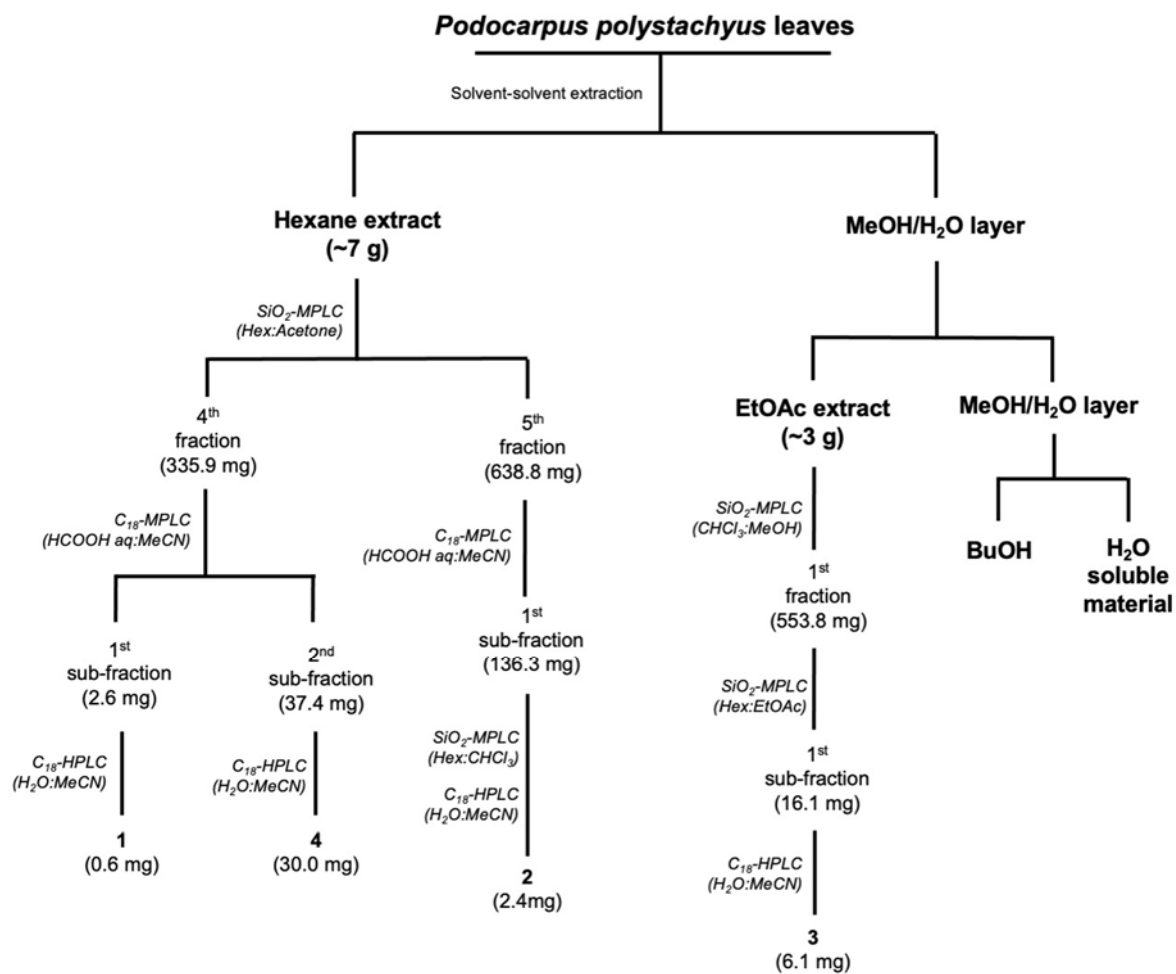

**Figure S1.** Isolation scheme of the leaf extract from *Podocarpus polystachyus*.

## Compound 1

Item name: 210908\_USM0019\_Hex\_F0011p Channel name: 2: Average Time 4.7322 min : HD TOF MSe (50-1500) 4eV ESI+ : Centroided : Combi...  
Item description:

8.22e4

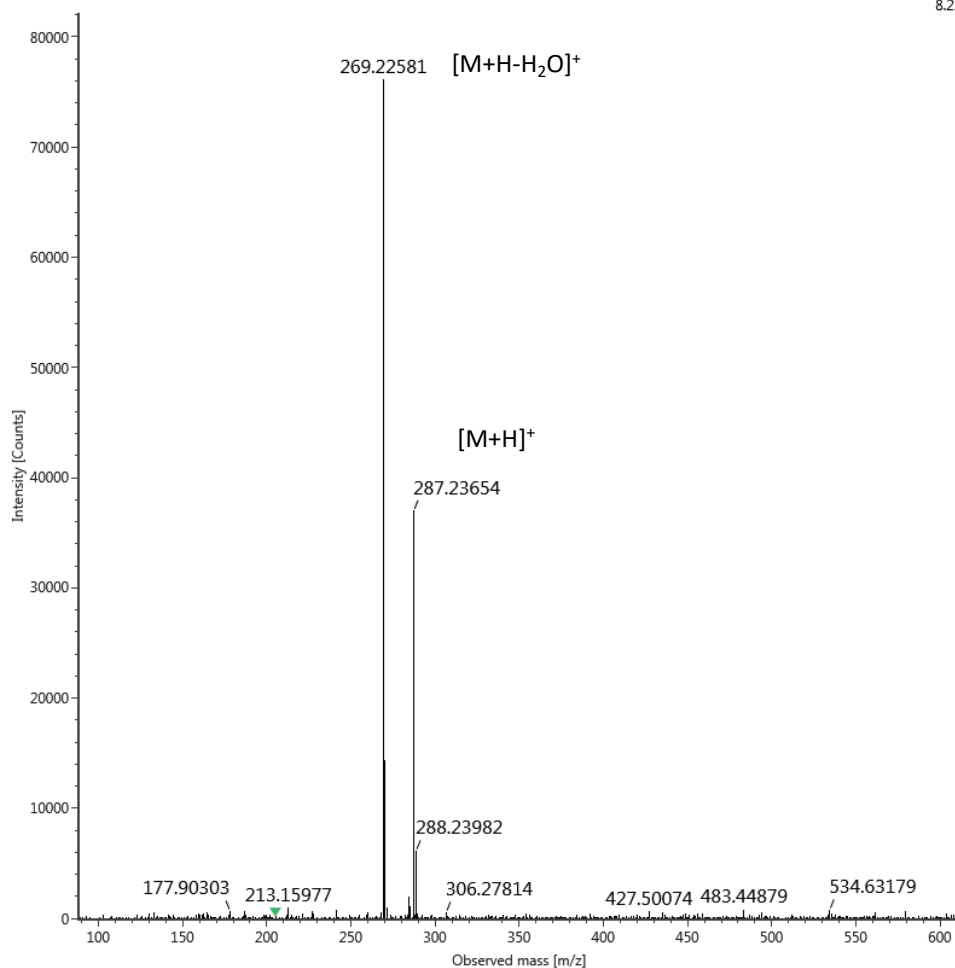

$m/z$ : 287.23654  $[M+H]^+$

| Composition | i-<br>FIT Confiden<br>ce (%) | $m/z$ RMS (PP<br>M) | Intensity RM<br>S (%) | Predicted $m/z$ | $m/z$ error (PP<br>M) | $m/z$ error (m<br>Da) | DBE      |
|-------------|------------------------------|---------------------|-----------------------|-----------------|-----------------------|-----------------------|----------|
| C20H30O     | 100.000000                   | 1.468589            | 12.995479             | 287.236942      | -1.404578             | -0.402031             | 6.000000 |

$m/z$ : 269.22581  $[M+H-H_2O]^+$

| Composition | i-<br>FIT Confiden<br>ce (%) | $m/z$ RMS (PP<br>M) | Intensity RM<br>S (%) | Predicted $m/z$ | $m/z$ error (PP<br>M) | $m/z$ error (m<br>Da) | DBE      |
|-------------|------------------------------|---------------------|-----------------------|-----------------|-----------------------|-----------------------|----------|
| C20H28      | 100.000000                   | 2.721461            | 7.787655              | 269.226377      | -2.115235             | -0.567345             | 7.000000 |

**Figure S2.** HR-ESI-TOF-MS spectrum of **1**.

## Compound 2

Item name: 210908\_USM0019\_Hex\_F0035 Channel name: 2: Average Time 4.5518 min : HD TOF MSe (50-1500) 4eV ESI+ : Centroided : Combin...  
Item description:

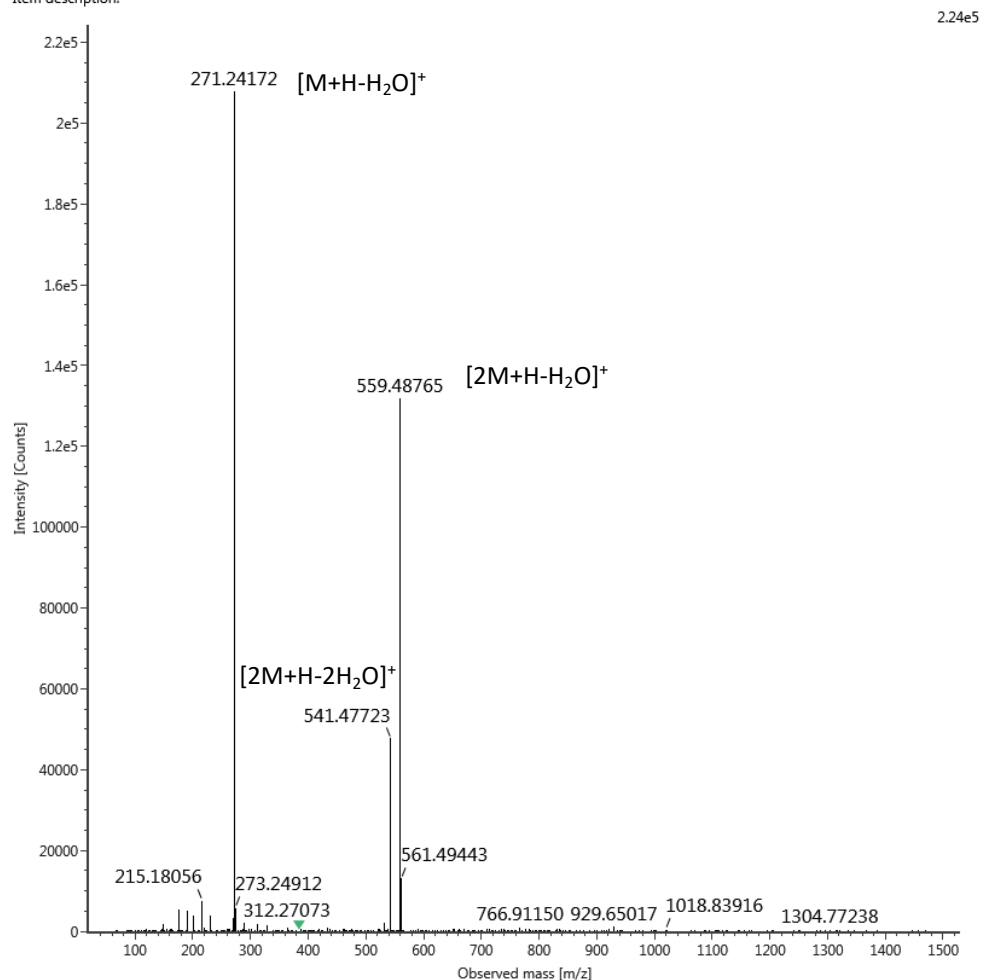

$m/z$ : 271.24172  $[M+H-H_2O]^+$

| Composition | i-FIT Confidence (%) | $m/z$ RMS (PPM) | Intensity RMS (%) | Predicted $m/z$ | $m/z$ error (PPM) | $m/z$ error (mDa) | DBE      |
|-------------|----------------------|-----------------|-------------------|-----------------|-------------------|-------------------|----------|
| C20H30      | 100.000000           | 1.490177        | 3.043532          | 271.242027      | -1.137564         | -0.307409         | 6.000000 |

$m/z$ : 559.48765  $[2M+H-H_2O]^+$

| Composition | i-FIT Confidence (%) | $m/z$ RMS (PPM) | Intensity RMS (%) | Predicted $m/z$ | $m/z$ error (PPM) | $m/z$ error (mDa) | DBE       |
|-------------|----------------------|-----------------|-------------------|-----------------|-------------------|-------------------|-----------|
| C40H62O     | 100.000000           | 0.581055        | 1.098484          | 559.487343      | 0.549613          | 0.306948          | 10.000000 |

$m/z$ : 541.47723  $[2M+H-2H_2O]^+$

| Composition | i-FIT Confidence (%) | $m/z$ RMS (PPM) | Intensity RMS (%) | Predicted $m/z$ | $m/z$ error (PPM) | $m/z$ error (mDa) | DBE       |
|-------------|----------------------|-----------------|-------------------|-----------------|-------------------|-------------------|-----------|
| C40H60      | 100.000000           | 1.078207        | 9.476290          | 541.476778      | 0.835632          | 0.451634          | 11.000000 |

**Figure S3.** HR-ESI-TOF-MS spectrum of **2**.

# Compound 3

Data:20210909\_003-Profile  
 Comment:USM0019-EtOAc-F0009\_0.1mg/mL+PFTBA,sless1uL(70-325i250,14min)  
 Description:  
 Ionization Mode:ESI<sup>+</sup>(eiFi)  
 History:Centroid[Peak Detect[Centroid,30,Area];Smooth[3]];Average(MS[1] 11.10..11.24)

Acquired:2021/09/09 16:02:16  
 Operator:AccuTOF  
 m/z Calibration File:PFTBA800\_EI\_pos  
 Created:2021/09/09 16:36:17  
 Created by:AccuTOF

Charge number:1  
 Element:<sup>12</sup>C:3 .. 20, <sup>1</sup>H:2 .. 32  
 Tolerance:1.00[ppm], 5.00 .. [mDa]

Unsaturation Number:-8.0 .. 80.0 (Fraction:...

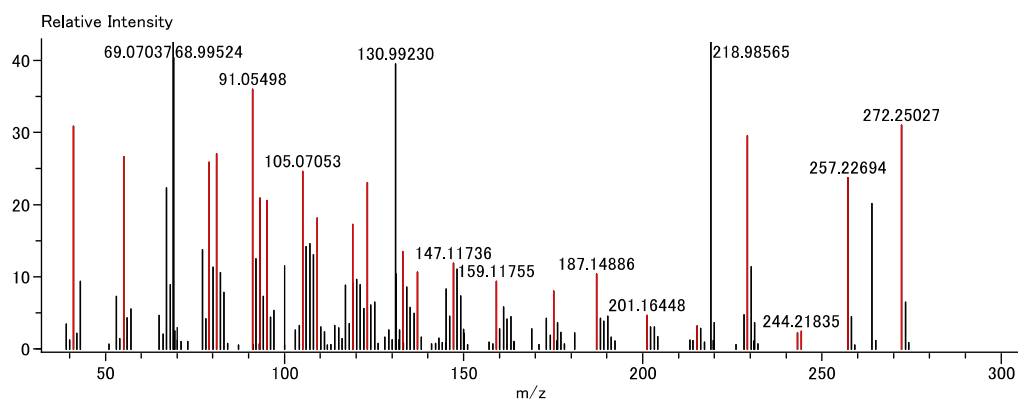

| Mass      | Intensity | Calc. Mass | Mass Difference [mDa] | Mass Difference [ppm] | Possible Formula                                           | Unsaturation Number |
|-----------|-----------|------------|-----------------------|-----------------------|------------------------------------------------------------|---------------------|
| 41.03917  | 21306.96  | 41.03913   | 0.05                  | 1.18                  | <sup>12</sup> C <sub>3</sub> <sup>1</sup> H <sub>5</sub>   | 1.5                 |
| 55.05484  | 18356.58  | 55.05478   | 0.06                  | 1.14                  | <sup>12</sup> C <sub>4</sub> <sup>1</sup> H <sub>7</sub>   | 1.5                 |
| 79.05493  | 17847.33  | 79.05478   | 0.15                  | 1.91                  | <sup>12</sup> C <sub>6</sub> <sup>1</sup> H <sub>7</sub>   | 3.5                 |
| 81.07039  | 18665.05  | 81.07043   | -0.03                 | -0.41                 | <sup>12</sup> C <sub>6</sub> <sup>1</sup> H <sub>9</sub>   | 2.5                 |
| 91.05498  | 24823.68  | 91.05478   | 0.20                  | 2.23                  | <sup>12</sup> C <sub>7</sub> <sup>1</sup> H <sub>7</sub>   | 4.5                 |
| 93.07038  | 14401.98  | 93.07043   | -0.04                 | -0.47                 | <sup>12</sup> C <sub>7</sub> <sup>1</sup> H <sub>9</sub>   | 3.5                 |
| 95.08604  | 14167.45  | 95.08608   | -0.04                 | -0.40                 | <sup>12</sup> C <sub>7</sub> <sup>1</sup> H <sub>11</sub>  | 2.5                 |
| 105.07053 | 16966.44  | 105.07043  | 0.11                  | 1.01                  | <sup>12</sup> C <sub>8</sub> <sup>1</sup> H <sub>9</sub>   | 4.5                 |
| 109.10151 | 12509.90  | 109.10173  | -0.21                 | -1.93                 | <sup>12</sup> C <sub>8</sub> <sup>1</sup> H <sub>13</sub>  | 2.5                 |
| 119.08613 | 11896.73  | 119.08608  | 0.06                  | 0.49                  | <sup>12</sup> C <sub>9</sub> <sup>1</sup> H <sub>11</sub>  | 4.5                 |
| 123.11731 | 15913.46  | 123.11738  | -0.06                 | -0.49                 | <sup>12</sup> C <sub>9</sub> <sup>1</sup> H <sub>15</sub>  | 2.5                 |
| 133.10180 | 9297.61   | 133.10173  | 0.07                  | 0.55                  | <sup>12</sup> C <sub>10</sub> <sup>1</sup> H <sub>13</sub> | 4.5                 |
| 137.13291 | 7333.20   | 137.13303  | -0.12                 | -0.86                 | <sup>12</sup> C <sub>10</sub> <sup>1</sup> H <sub>17</sub> | 2.5                 |
| 147.11736 | 8160.18   | 147.11738  | -0.02                 | -0.11                 | <sup>12</sup> C <sub>11</sub> <sup>1</sup> H <sub>15</sub> | 4.5                 |
| 159.11755 | 6419.89   | 159.11738  | 0.17                  | 1.07                  | <sup>12</sup> C <sub>12</sub> <sup>1</sup> H <sub>15</sub> | 5.5                 |
| 175.14874 | 5522.66   | 175.14868  | 0.06                  | 0.35                  | <sup>12</sup> C <sub>13</sub> <sup>1</sup> H <sub>19</sub> | 4.5                 |
| 187.14886 | 7151.34   | 187.14868  | 0.18                  | 0.97                  | <sup>12</sup> C <sub>14</sub> <sup>1</sup> H <sub>19</sub> | 5.5                 |
| 201.16448 | 3169.76   | 201.16433  | 0.16                  | 0.78                  | <sup>12</sup> C <sub>15</sub> <sup>1</sup> H <sub>21</sub> | 5.5                 |
| 215.18013 | 2149.29   | 215.17998  | 0.16                  | 0.74                  | <sup>12</sup> C <sub>16</sub> <sup>1</sup> H <sub>23</sub> | 5.5                 |
| 229.19552 | 20388.62  | 229.19563  | -0.10                 | -0.45                 | <sup>12</sup> C <sub>17</sub> <sup>1</sup> H <sub>25</sub> | 5.5                 |
| 243.21121 | 1500.19   | 243.21128  | -0.07                 | -0.28                 | <sup>12</sup> C <sub>18</sub> <sup>1</sup> H <sub>27</sub> | 5.5                 |
| 244.21835 | 1645.92   | 244.21910  | -0.75                 | -3.08                 | <sup>12</sup> C <sub>18</sub> <sup>1</sup> H <sub>28</sub> | 5.0                 |
| 257.22694 | 16372.79  | 257.22693  | 0.01                  | 0.05                  | <sup>12</sup> C <sub>19</sub> <sup>1</sup> H <sub>29</sub> | 5.5                 |
| 272.25027 | 21381.51  | 272.25040  | -0.13                 | -0.46                 | <sup>12</sup> C <sub>20</sub> <sup>1</sup> H <sub>32</sub> | 5.0                 |

Figure S4. HR-ESI-TOF-MS spectrum of 3.

## Compound 4

Item name: USM0019H-F0016\_p\_CV30 Channel name: 2: Average Time 6.0073 min : HD TOF MSe (50-1500) 4eV ESI+ : Centroided : Combined  
Item description:

9.23e5

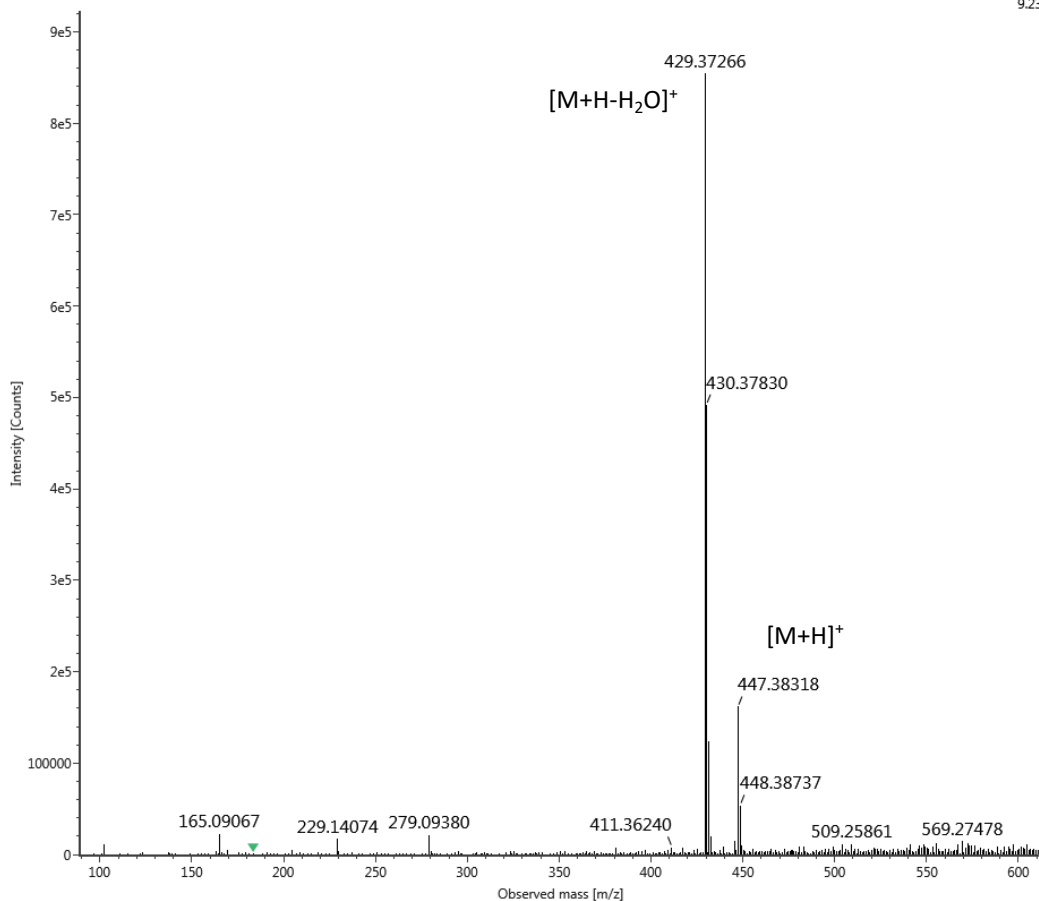

*m/z*: 447.38318 [M+H]<sup>+</sup>

| Composition | i-FIT Confidence (%) | <i>m/z</i> RMS (PPM) | Intensity RMS (%) | Predicted <i>m/z</i> | <i>m/z</i> error (PPM) | <i>m/z</i> error (mDa) | DBE      |
|-------------|----------------------|----------------------|-------------------|----------------------|------------------------|------------------------|----------|
| C29H50O3    | 100.000000           | 0.891141             | 3.402658          | 447.383272           | -0.205911              | -0.091914              | 5.000000 |

*m/z*: 429.37266 [M+H-H<sub>2</sub>O]<sup>+</sup>

| Composition | i-FIT Confidence (%) | <i>m/z</i> RMS (PPM) | Intensity RMS (%) | Predicted <i>m/z</i> | <i>m/z</i> error (PPM) | <i>m/z</i> error (mDa) | DBE      |
|-------------|----------------------|----------------------|-------------------|----------------------|------------------------|------------------------|----------|
| C29H48O2    | 100.000000           | 2.798494             | 39.760358         | 429.372707           | -0.110251              | -0.047228              | 6.000000 |

**Figure S5.** HR-EI-TOF-MS spectrum of **4**.



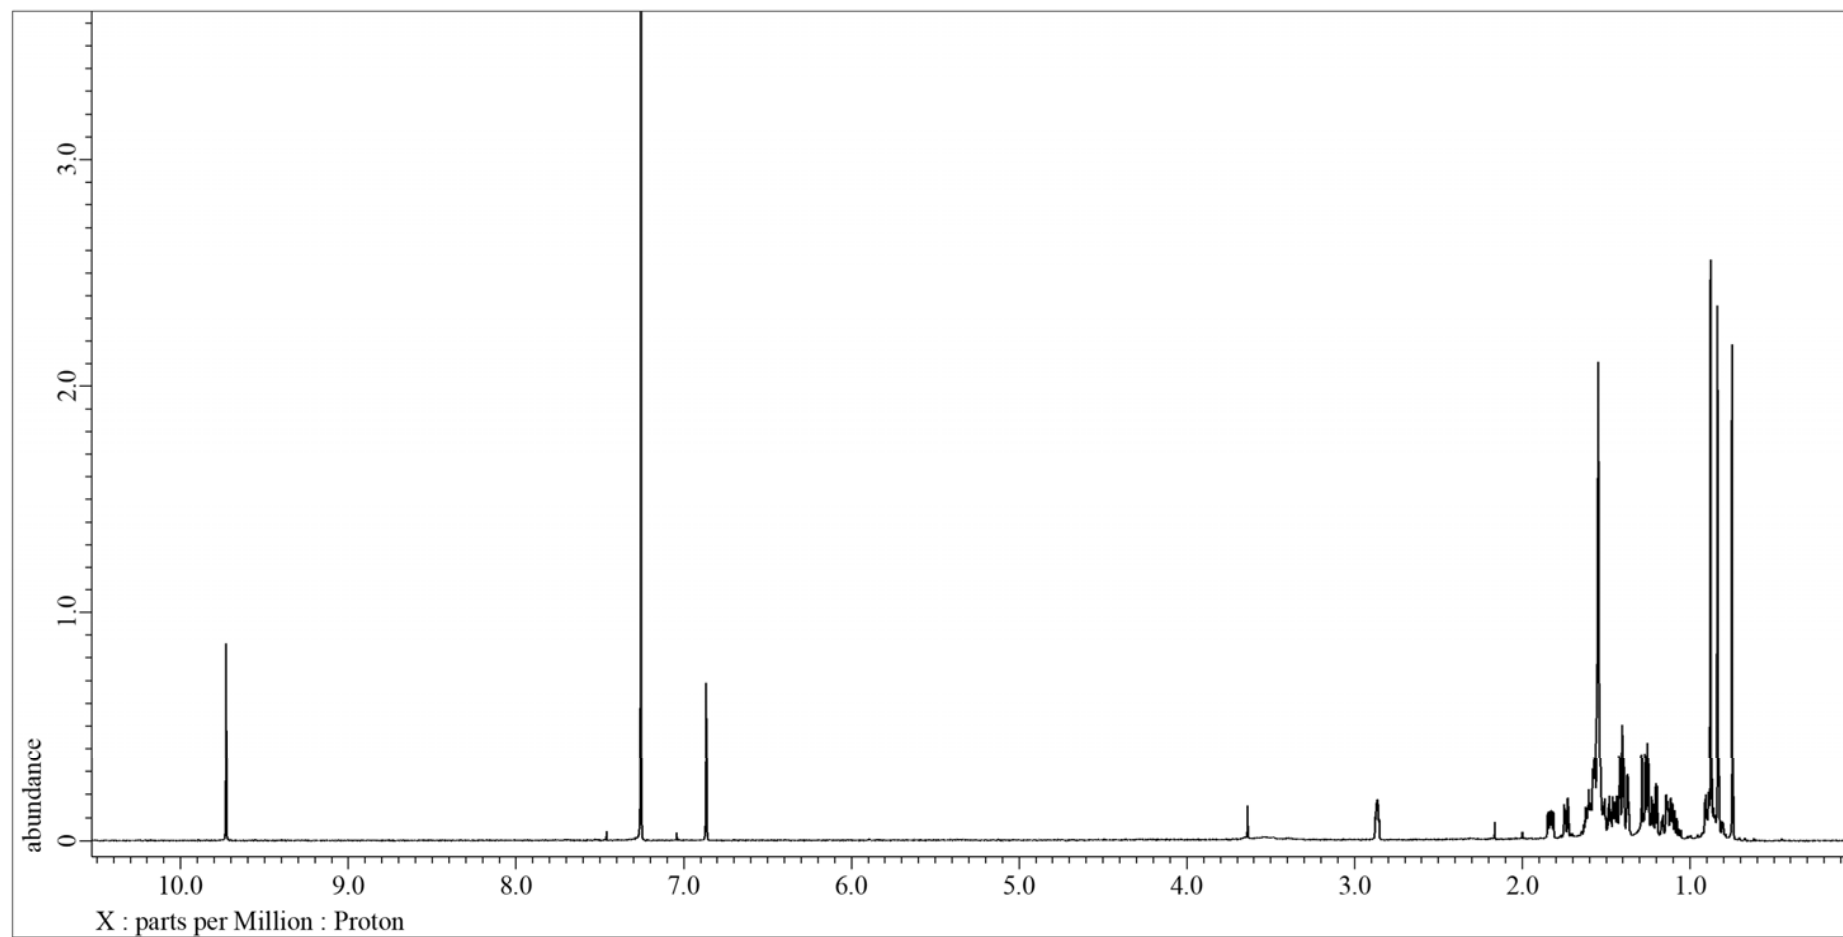

**Figure S6.**  $^1\text{H}$  NMR spectrum of **1**.

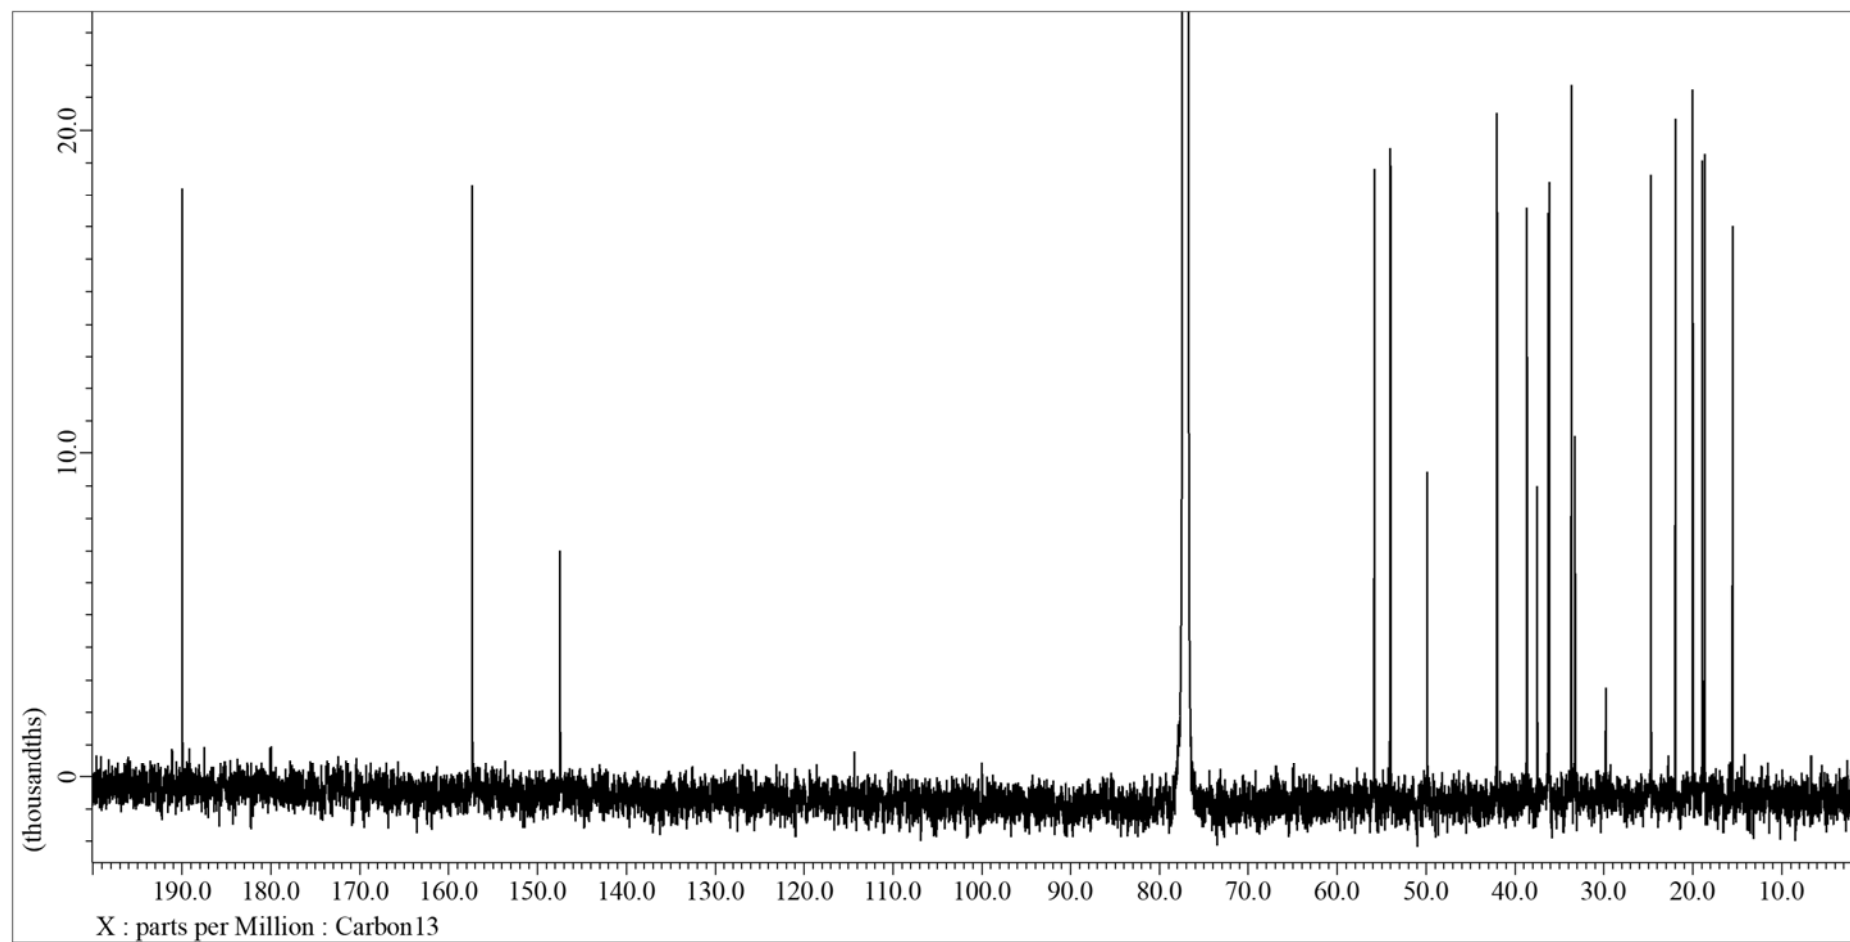

**Figure S7.**  $^{13}\text{C}$  NMR spectrum of **1**.

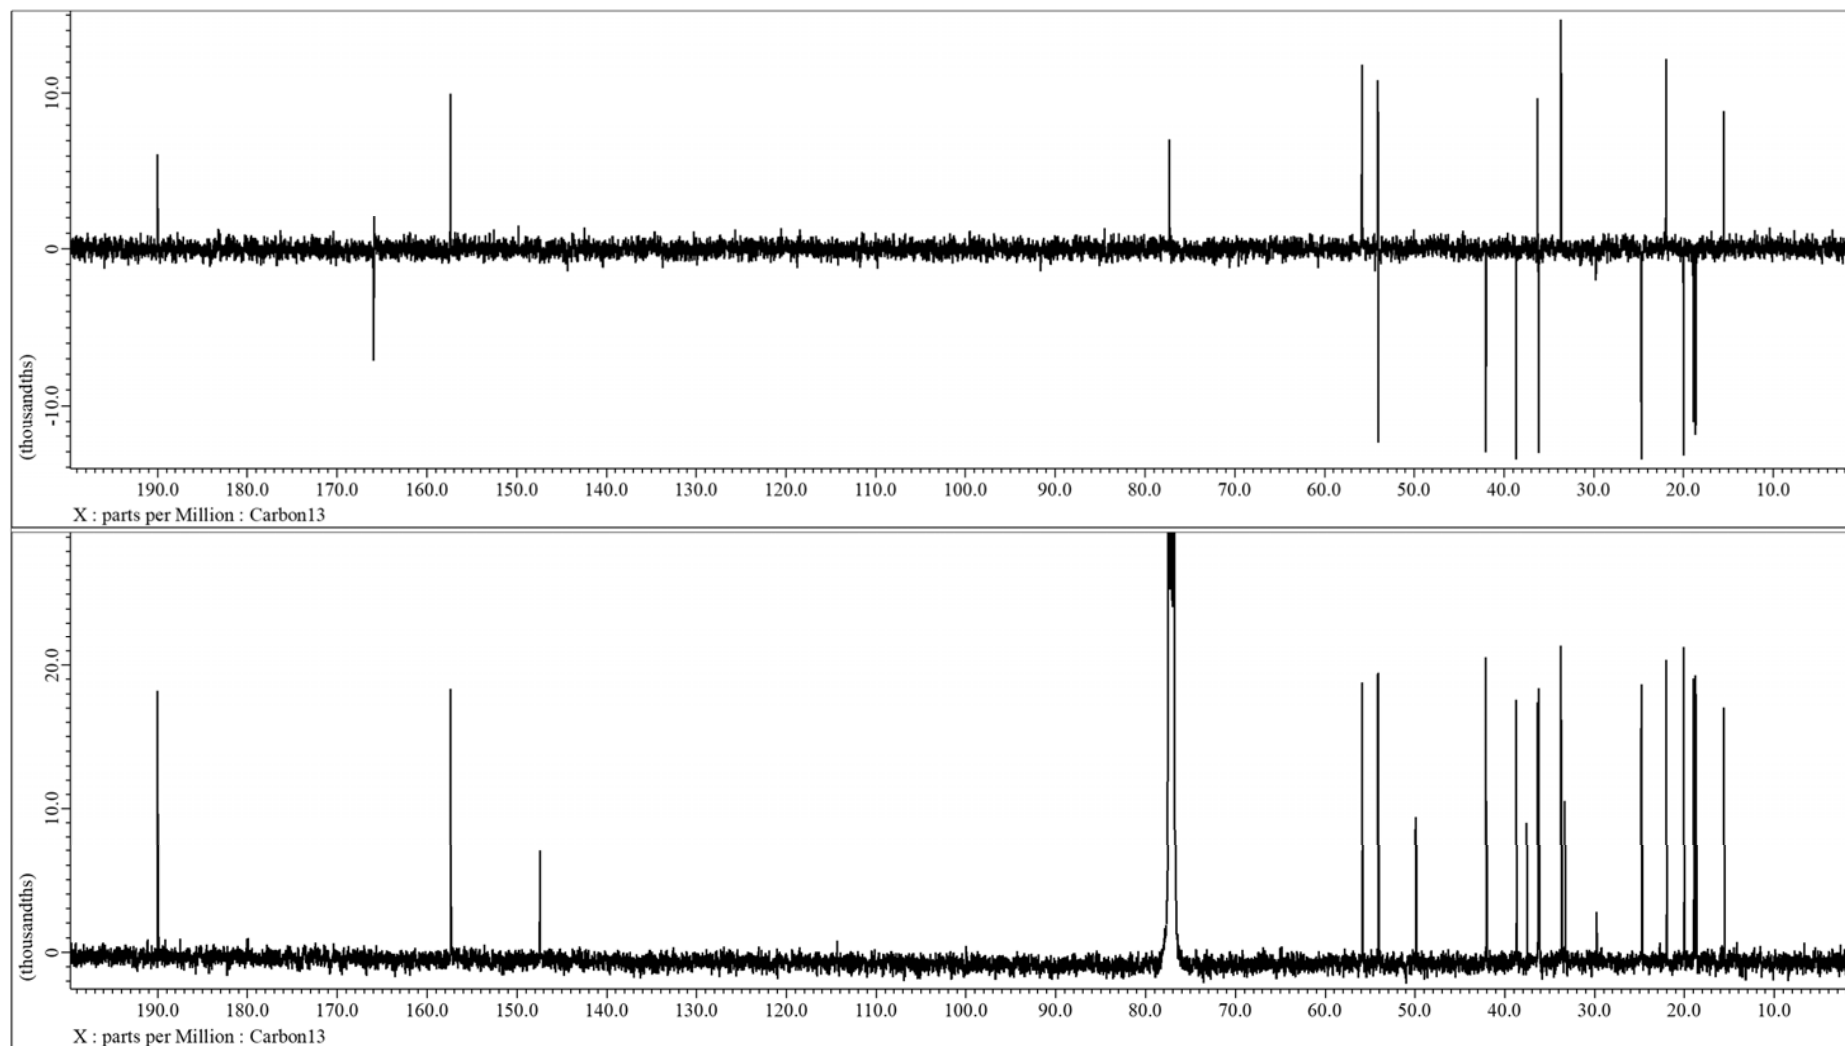

Figure S8. DEPT-135 spectrum of 1.

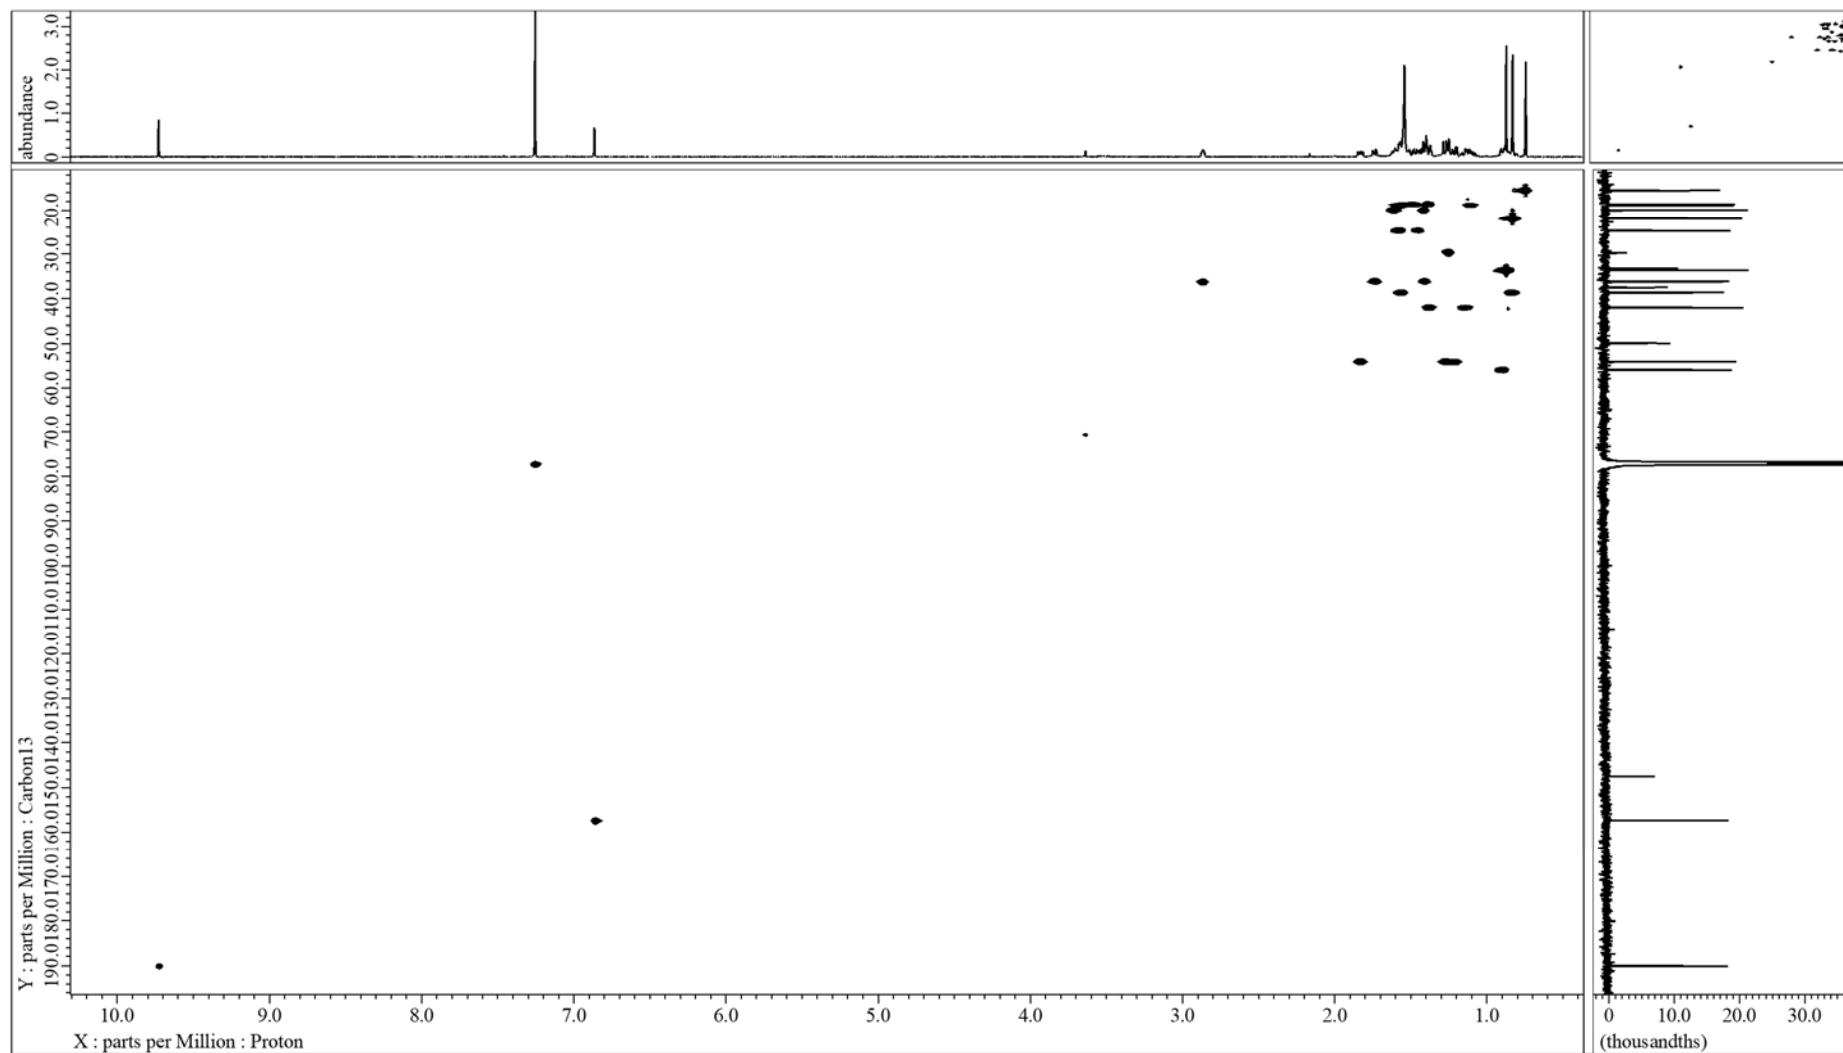

**Figure S9.** HSQC spectrum of **1**.

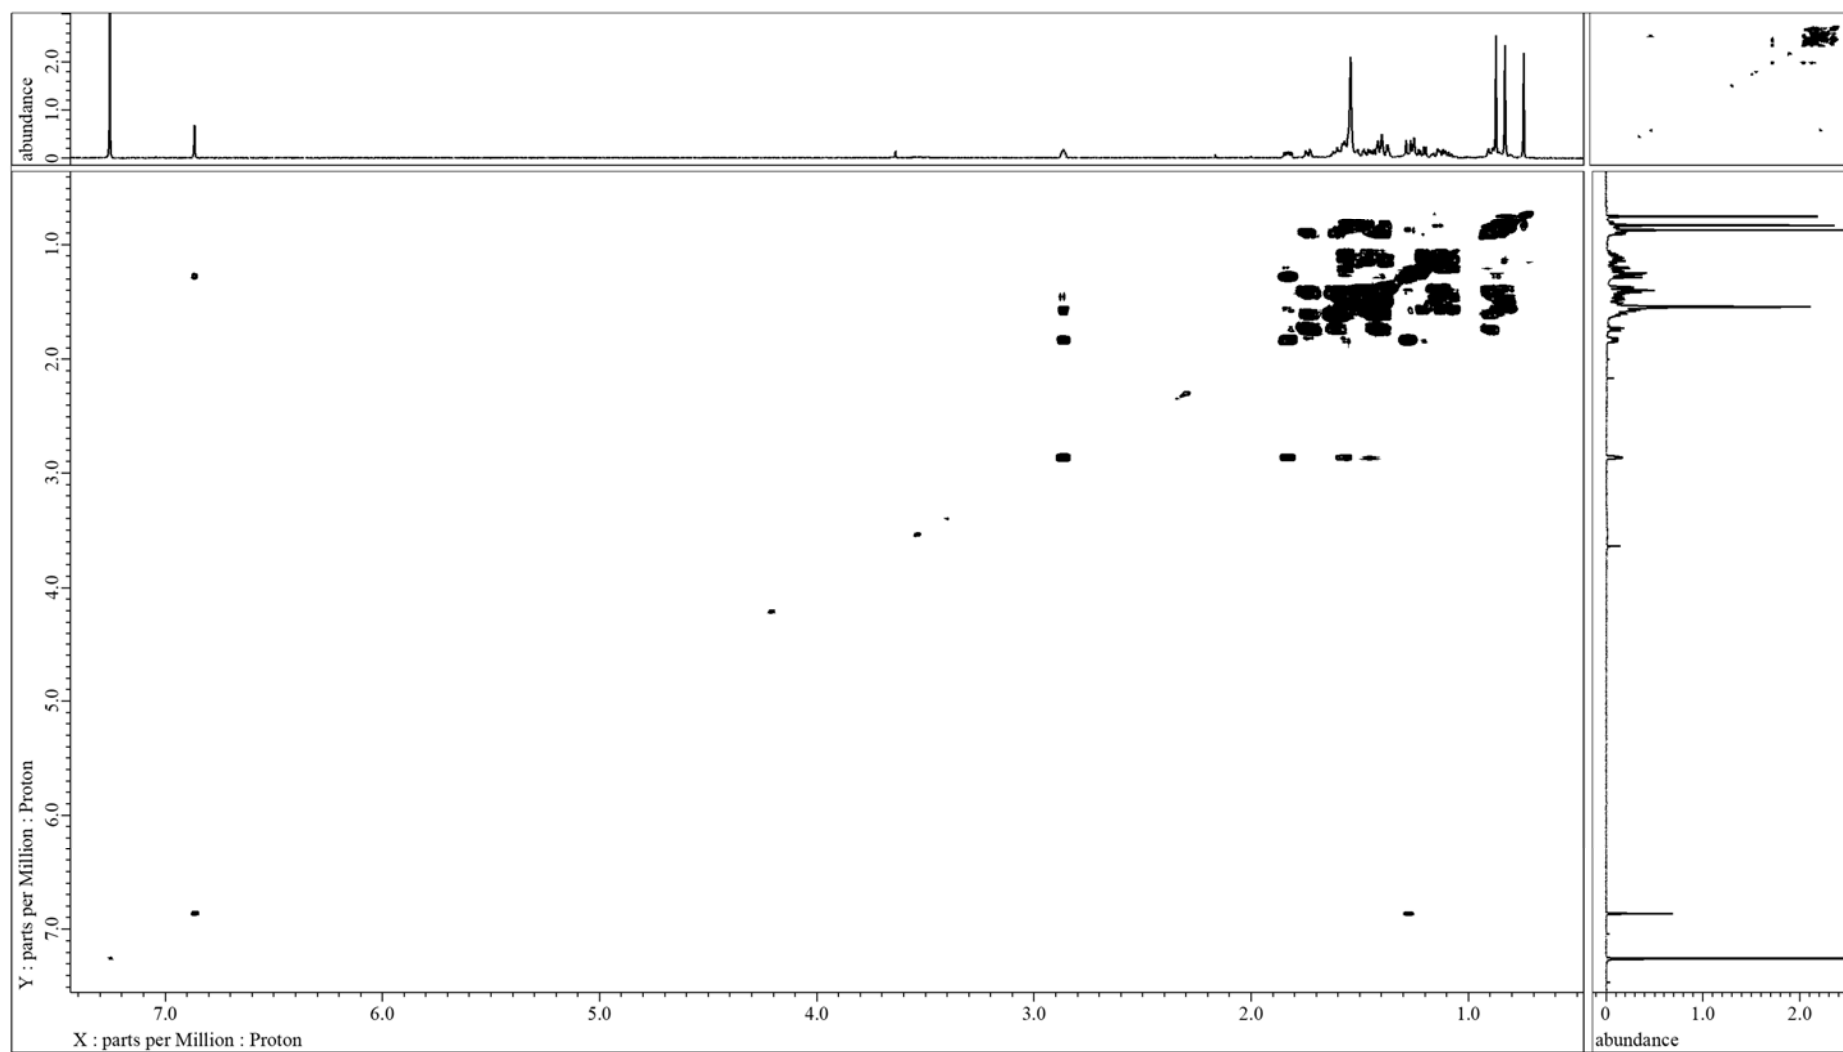

**Figure S10.** DQF-COSY spectrum of **1**.

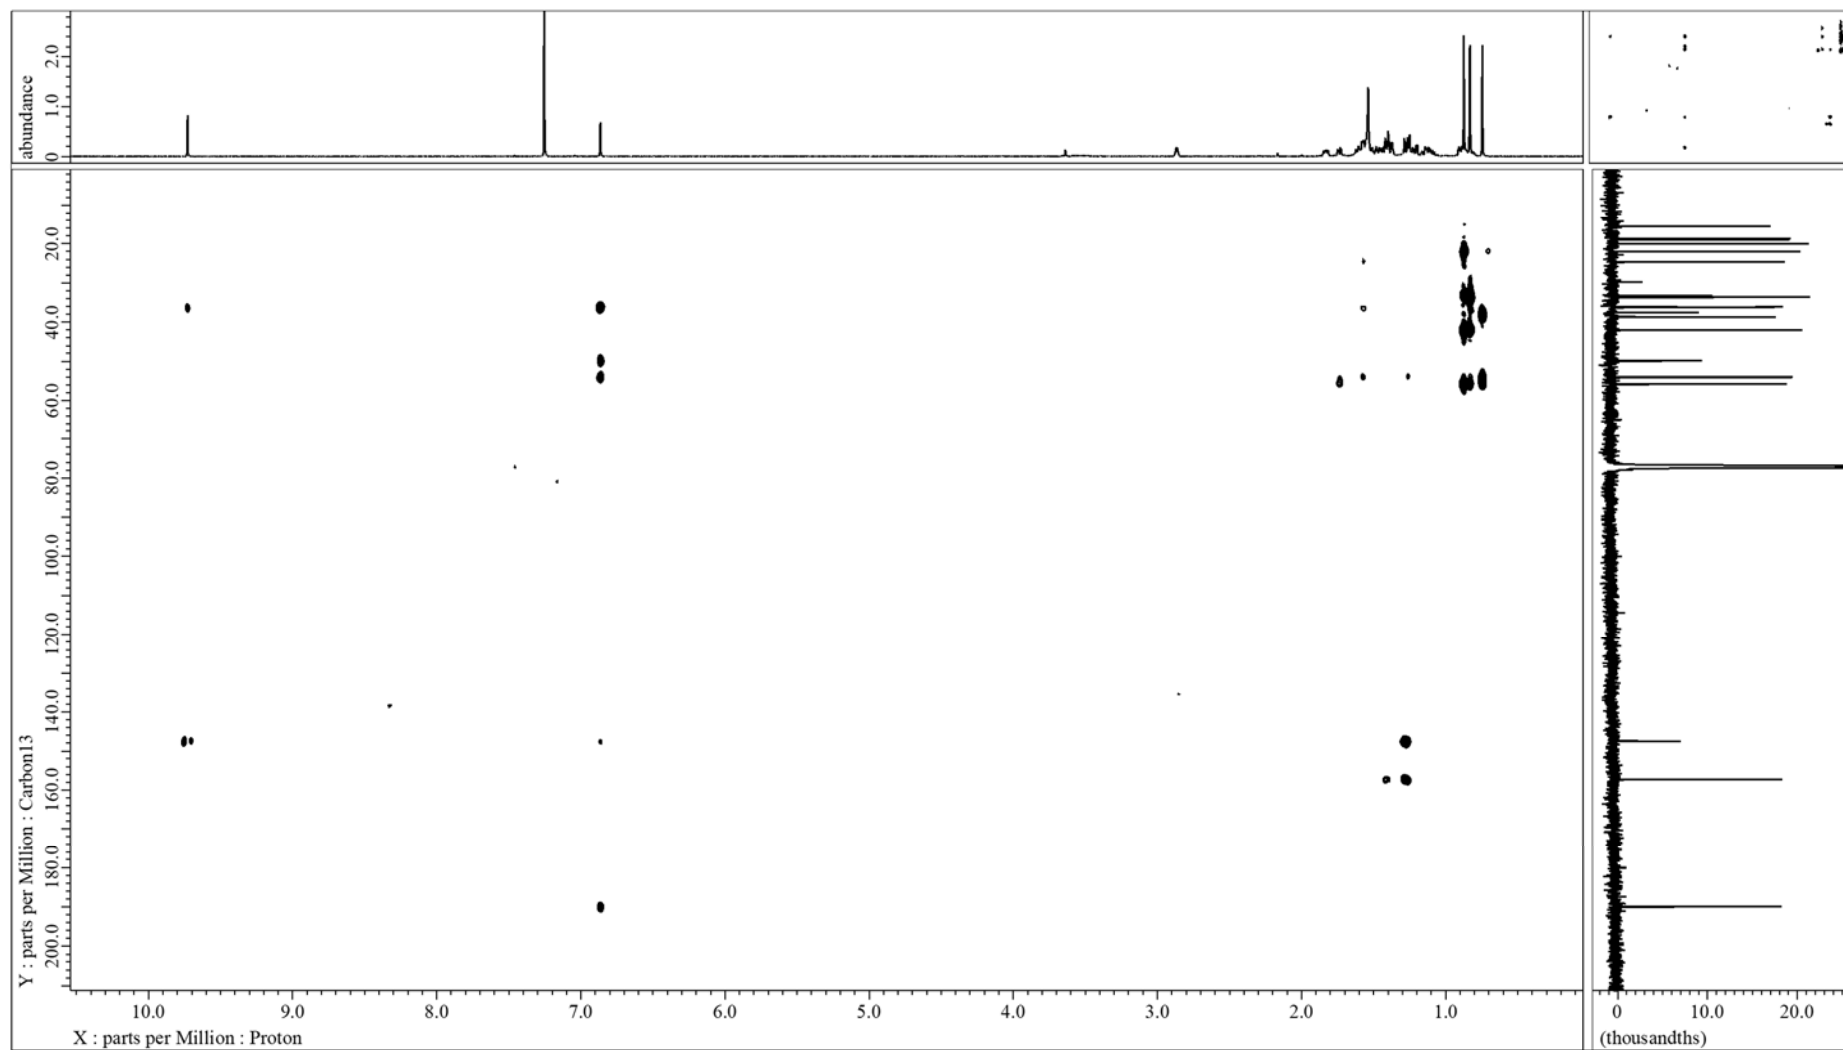

Figure S11. HMBC spectrum of **1**.

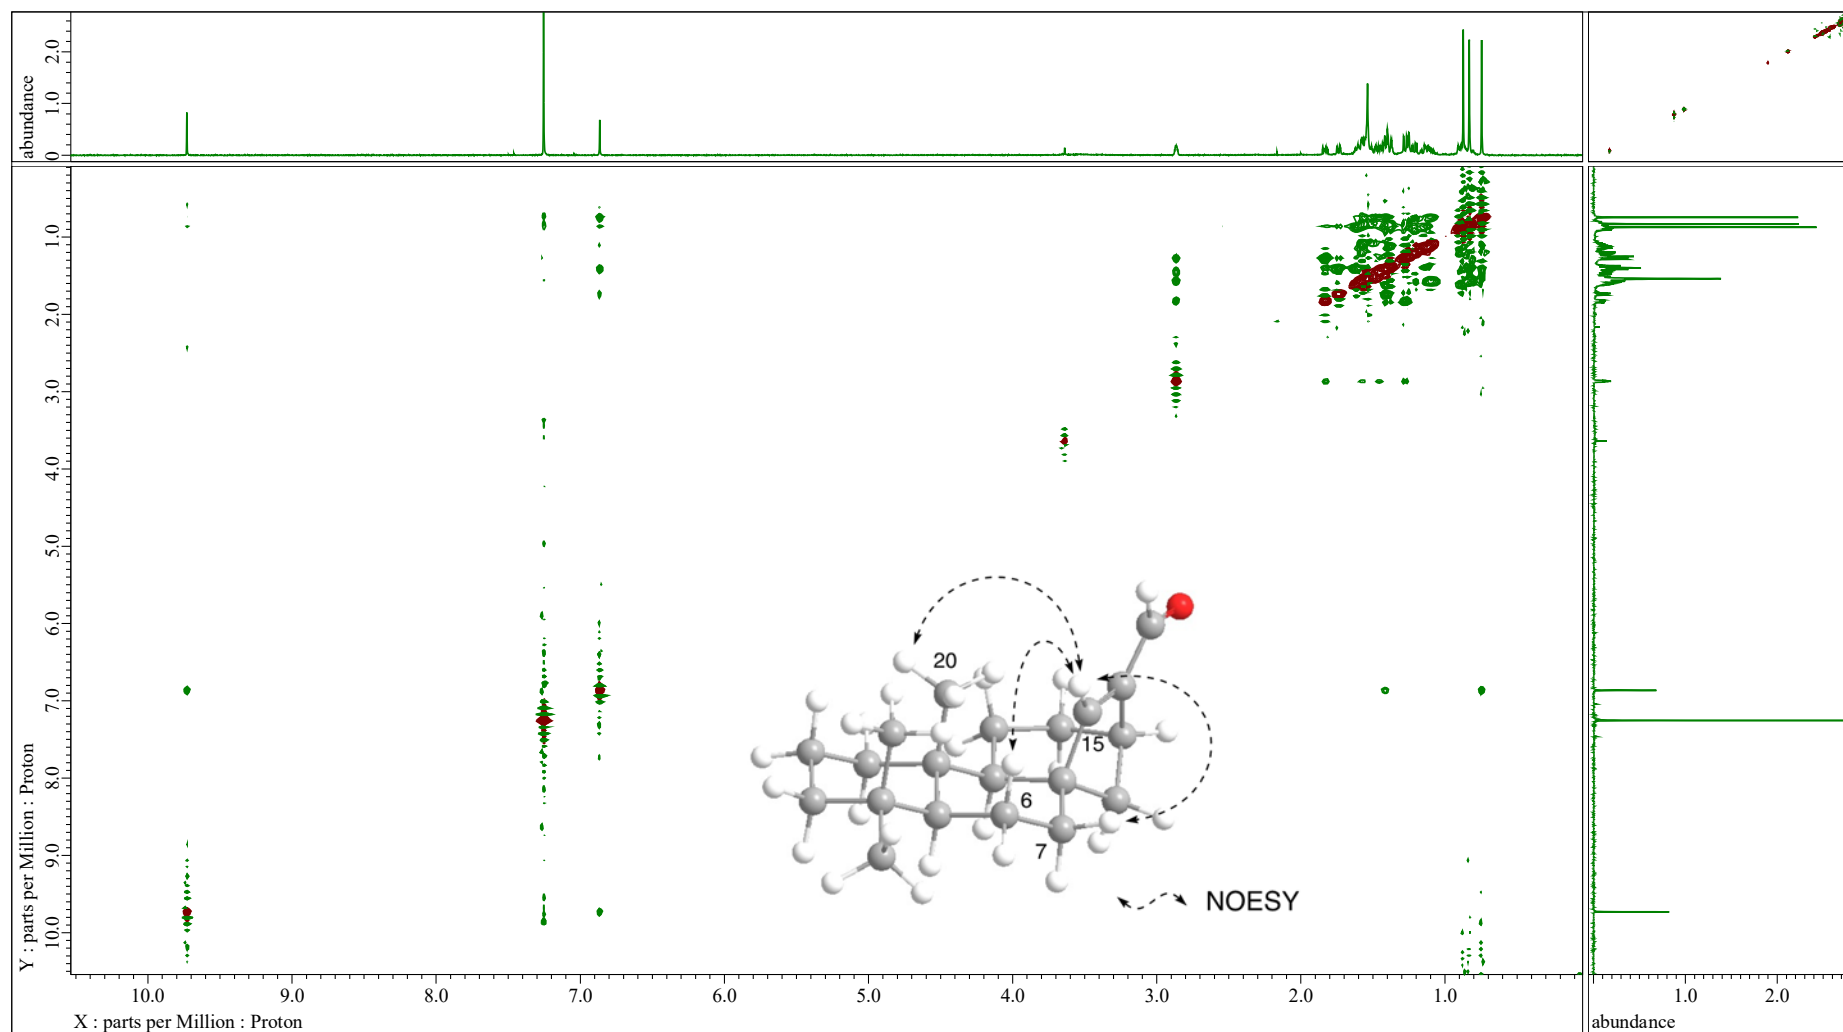

**Figure S12.** NOESY spectrum of **1**.

| Starting structure |           |           |           | Optimized structure |           |           |           |
|--------------------|-----------|-----------|-----------|---------------------|-----------|-----------|-----------|
| H                  | 1.372017  | -3.184947 | -1.265359 | H                   | 1.390576  | -3.135287 | -1.247887 |
| C                  | 0.281771  | -3.098313 | -1.302125 | C                   | 0.295343  | -3.074964 | -1.266728 |
| C                  | 0.155735  | -0.81795  | -0.097608 | C                   | 0.174174  | -0.78784  | -0.094648 |
| C                  | 0.222443  | -0.976649 | -2.770696 | C                   | 0.217692  | -0.977299 | -2.756385 |
| C                  | -0.234505 | -0.189151 | -1.490133 | C                   | -0.219436 | -0.186269 | -1.485251 |
| C                  | -0.155737 | -2.471308 | -2.618847 | C                   | -0.181133 | -2.45647  | -2.577679 |
| C                  | -0.245482 | -2.318605 | -0.099631 | C                   | -0.21972  | -2.281923 | -0.065841 |
| H                  | -0.101713 | -4.124839 | -1.253201 | H                   | -0.061565 | -4.10916  | -1.196942 |
| H                  | -1.246863 | -2.577635 | -2.6946   | H                   | -1.278761 | -2.523228 | -2.611973 |
| H                  | 0.26266   | -3.05479  | -3.449052 | H                   | 0.190957  | -3.036934 | -3.43215  |
| H                  | -1.340217 | -2.405264 | -0.090327 | H                   | -1.317391 | -2.356018 | -0.045938 |
| H                  | 0.110325  | -2.810446 | 0.813937  | H                   | 0.141829  | -2.743046 | 0.860749  |
| C                  | 0.078433  | 1.322462  | -1.524055 | C                   | 0.100088  | 1.31443   | -1.536463 |
| C                  | -0.708749 | 2.076734  | -0.452013 | C                   | -0.715444 | 2.070874  | -0.490685 |
| C                  | -0.543803 | 1.502135  | 0.956293  | C                   | -0.56943  | 1.526399  | 0.930553  |
| C                  | -0.69623  | -0.057284 | 1.002438  | C                   | -0.691173 | -0.035611 | 0.973731  |
| H                  | -0.199067 | 1.754207  | -2.490646 | H                   | -0.130435 | 1.722651  | -2.525461 |
| H                  | 1.149045  | 1.51324   | -1.405313 | H                   | 1.170497  | 1.493925  | -1.381245 |
| H                  | -1.771534 | 2.046818  | -0.728899 | H                   | -1.776831 | 2.002412  | -0.768614 |
| H                  | -0.419857 | 3.135438  | -0.475945 | H                   | -0.463052 | 3.13902   | -0.495443 |
| C                  | -0.549326 | -0.614045 | 2.453017  | C                   | -0.516341 | -0.569134 | 2.415581  |
| C                  | -1.19362  | 0.275936  | 3.538377  | C                   | -1.220823 | 0.266416  | 3.500623  |
| C                  | -1.011256 | 1.779172  | 3.276179  | C                   | -1.054646 | 1.777321  | 3.252916  |
| C                  | -1.607394 | 2.103054  | 1.90587   | C                   | -1.651303 | 2.09482   | 1.877574  |
| H                  | 0.505694  | -0.733161 | 2.716574  | H                   | 0.547904  | -0.607488 | 2.665513  |
| H                  | -0.990224 | -1.615597 | 2.517339  | H                   | -0.879847 | -1.59987  | 2.468628  |
| H                  | -0.774505 | 0.008572  | 4.51603   | H                   | -0.82195  | -0.006954 | 4.483629  |
| H                  | -2.26684  | 0.051487  | 3.585176  | H                   | -2.293793 | 0.038445  | 3.515129  |
| H                  | -1.463037 | 2.391848  | 4.061496  | H                   | -1.480811 | 2.35342   | 4.076933  |
| H                  | -2.605041 | 1.671781  | 1.762252  | H                   | -2.63428  | 1.639321  | 1.710822  |
| H                  | -1.701007 | 3.190667  | 1.770175  | H                   | -1.741901 | 3.177478  | 1.726562  |
| C                  | -0.550242 | -0.451207 | -4.011211 | C                   | -0.562741 | -0.443207 | -3.972776 |
| H                  | -0.238844 | 0.559861  | -4.291653 | H                   | -0.21409  | 0.54426   | -4.291584 |
| H                  | -1.631042 | -0.434626 | -3.83162  | H                   | -1.635896 | -0.371434 | -3.760245 |
| H                  | -0.374002 | -1.091704 | -4.88386  | H                   | -0.436643 | -1.119857 | -4.82575  |
| H                  | -1.335353 | -0.253197 | -1.526275 | H                   | -1.320465 | -0.257751 | -1.503934 |
| H                  | -1.749624 | -0.252218 | 0.741336  | H                   | -1.735197 | -0.235304 | 0.685254  |
| C                  | 1.718442  | -0.834374 | -3.107112 | C                   | 1.713728  | -0.858674 | -3.09131  |
| H                  | 2.025824  | 0.214938  | -3.154151 | H                   | 2.028504  | 0.189748  | -3.135021 |
| H                  | 2.370125  | -1.347555 | -2.401911 | H                   | 2.358557  | -1.371207 | -2.374688 |
| H                  | 1.936034  | -1.273615 | -4.088769 | H                   | 1.908324  | -1.301349 | -4.075695 |
| C                  | 1.670106  | -0.729378 | 0.210763  | C                   | 1.680648  | -0.67687  | 0.210622  |
| H                  | 2.265403  | -1.40764  | -0.399266 | H                   | 2.264219  | -1.378    | -0.387847 |
| H                  | 2.082247  | 0.268025  | 0.057396  | H                   | 2.084662  | 0.318308  | 0.014337  |
| H                  | 1.896029  | -1.020158 | 1.239826  | H                   | 1.887802  | -0.915972 | 1.257414  |
| C                  | 0.696972  | 1.98901   | 1.684244  | C                   | 0.673227  | 1.975271  | 1.68207   |
| H                  | 1.655726  | 2.168223  | 1.219332  | H                   | 1.651949  | 2.113848  | 1.230183  |
| C                  | 0.421627  | 2.126964  | 2.99061   | C                   | 0.401092  | 2.11454   | 2.987888  |
| C                  | 1.374296  | 2.556587  | 4.020398  | C                   | 1.388305  | 2.432619  | 4.019286  |
| H                  | 2.392694  | 2.784875  | 3.665138  | H                   | 2.407227  | 2.669991  | 3.643102  |
| O                  | 1.061464  | 2.653623  | 5.20008   | O                   | 1.147789  | 2.441601  | 5.209086  |

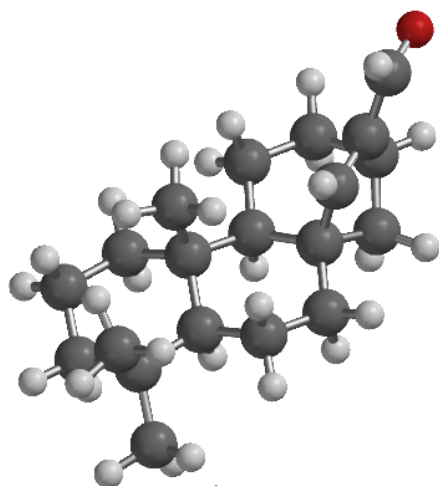

Starting structure  
8β,13β-Kaur-15-en-17-al  
(5*S*, 8*S*, 9*R*, 10*S*, 13*R*-form)

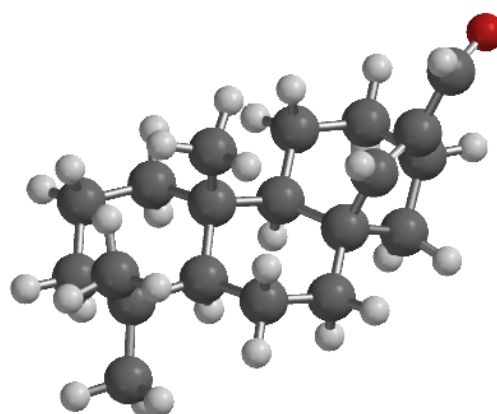

Optimized structure  
8β,13β-Kaur-15-en-17-al  
(5*S*, 8*S*, 9*R*, 10*S*, 13*R*-form)

**Figure S13.** Conformation analysis and calculation of NMR chemical shifts of 8β,13β-kaur-15-en-17-al.



| Starting structure |           |           |           | Optimized structure |           |           |           |
|--------------------|-----------|-----------|-----------|---------------------|-----------|-----------|-----------|
| H                  | -2.080519 | 1.232101  | -1.320229 | H                   | -2.020478 | 1.21494   | -1.322955 |
| C                  | -2.022778 | 0.148036  | -1.15437  | C                   | -1.978365 | 0.127525  | -1.160398 |
| C                  | -0.941188 | 0.363031  | 1.137383  | C                   | -0.937473 | 0.34932   | 1.133461  |
| C                  | -3.476718 | 0.285775  | 0.905948  | C                   | -3.443419 | 0.305801  | 0.880529  |
| C                  | -2.288475 | -0.008343 | 1.855503  | C                   | -2.279827 | -0.00756  | 1.843088  |
| C                  | -3.323148 | -0.300162 | -0.490978 | C                   | -3.287212 | -0.314031 | -0.505116 |
| C                  | -0.748853 | -0.183013 | -0.329466 | C                   | -0.724377 | -0.197291 | -0.317117 |
| H                  | -1.965101 | -0.313056 | -2.14794  | H                   | -1.889221 | -0.333728 | -2.150971 |
| H                  | -4.413484 | -0.079804 | 1.345912  | H                   | -4.388298 | -0.01491  | 1.338613  |
| H                  | -3.595903 | 1.373255  | 0.802116  | H                   | -3.509093 | 1.397861  | 0.764881  |
| H                  | -4.16705  | 0.030067  | -1.109029 | H                   | -4.129286 | -0.01373  | -1.13965  |
| H                  | -3.388624 | -1.391917 | -0.455241 | H                   | -3.336498 | -1.408105 | -0.441615 |
| C                  | 0.484803  | 0.596805  | -0.949573 | C                   | 0.486322  | 0.598159  | -0.916388 |
| C                  | 1.785959  | 0.520358  | -0.078768 | C                   | 1.79157   | 0.552869  | -0.048987 |
| C                  | 1.536929  | 0.841315  | 1.396245  | C                   | 1.509201  | 0.857929  | 1.421893  |
| C                  | 0.324078  | 0.123624  | 1.989345  | C                   | 0.309889  | 0.107184  | 1.994261  |
| H                  | 2.422299  | 0.604314  | 2.000263  | H                   | 2.413099  | 0.658035  | 2.011523  |
| H                  | 1.376841  | 1.922759  | 1.505456  | H                   | 1.313696  | 1.936089  | 1.510511  |
| H                  | 0.53791   | -0.943607 | 2.098896  | H                   | 0.534804  | -0.963437 | 2.067022  |
| H                  | 0.186622  | 0.509021  | 3.004373  | H                   | 0.139529  | 0.446713  | 3.020676  |
| C                  | 2.806807  | 1.517379  | -0.676968 | C                   | 2.786333  | 1.563227  | -0.665159 |
| C                  | 3.244844  | 0.782463  | -1.944269 | C                   | 3.233046  | 0.822442  | -1.930085 |
| C                  | 2.10527   | 0.871178  | -2.971509 | C                   | 2.081245  | 0.896448  | -2.94935  |
| C                  | 0.771398  | 0.290677  | -2.452867 | C                   | 0.789067  | 0.265492  | -2.397008 |
| H                  | 3.661961  | 1.672525  | -0.002638 | H                   | 3.627884  | 1.716958  | 0.021188  |
| H                  | 2.374528  | 2.503415  | -0.883828 | H                   | 2.32284   | 2.535524  | -0.867668 |
| H                  | 4.183215  | 1.186742  | -2.334419 | H                   | 4.162162  | 1.192771  | -2.368725 |
| H                  | 1.949756  | 1.924099  | -3.238981 | H                   | 1.910699  | 1.951888  | -3.195025 |
| H                  | 2.386973  | 0.351368  | -3.895299 | H                   | 2.360408  | 0.39185   | -3.880763 |
| H                  | 0.797749  | -0.788578 | -2.629594 | H                   | 0.870378  | -0.818341 | -2.520232 |
| H                  | -0.042584 | 0.677717  | -3.076781 | H                   | -0.054529 | 0.579931  | -3.019354 |
| C                  | -2.359283 | -1.458618 | 2.368457  | C                   | -2.366477 | -1.460444 | 2.339191  |
| H                  | -2.432202 | -2.195621 | 1.570419  | H                   | -2.432077 | -2.189446 | 1.529081  |
| H                  | -3.250816 | -1.603848 | 2.991359  | H                   | -3.261486 | -1.585956 | 2.960398  |
| H                  | -1.494229 | -1.712292 | 2.989007  | H                   | -1.499646 | -1.722102 | 2.956013  |
| C                  | -0.526902 | -1.713879 | -0.38815  | C                   | -0.486359 | -1.718897 | -0.365751 |
| H                  | -1.430478 | -2.280164 | -0.165831 | H                   | -1.402467 | -2.275565 | -0.163949 |
| H                  | 0.237074  | -2.064236 | 0.305957  | H                   | 0.25581   | -2.060327 | 0.358737  |
| H                  | -0.236163 | -2.04737  | -1.387559 | H                   | -0.146368 | -2.031556 | -1.35686  |
| C                  | 2.569974  | -0.75924  | -0.312081 | C                   | 2.554279  | -0.7345   | -0.315319 |
| H                  | 2.468566  | -1.661537 | 0.27362   | H                   | 2.423131  | -1.657024 | 0.244116  |
| C                  | 3.37626   | -0.600415 | -1.373268 | C                   | 3.363903  | -0.583784 | -1.37376  |
| C                  | -2.485041 | 0.899281  | 3.100328  | C                   | -2.453816 | 0.902238  | 3.074351  |
| H                  | -1.775153 | 0.661549  | 3.898712  | H                   | -1.779747 | 0.629552  | 3.892486  |
| H                  | -2.365639 | 1.958366  | 2.845885  | H                   | -2.27509  | 1.954509  | 2.823715  |
| H                  | -3.490156 | 0.775913  | 3.521442  | H                   | -3.476741 | 0.820417  | 3.459651  |
| H                  | -1.003493 | 1.458424  | 1.021172  | H                   | -1.000396 | 1.4428    | 0.999121  |
| H                  | 0.192493  | 1.659941  | -0.939106 | H                   | 0.175464  | 1.654372  | -0.885118 |
| C                  | 4.273008  | -1.624081 | -1.921509 | C                   | 4.170374  | -1.647808 | -1.971284 |
| H                  | 4.270342  | -2.593654 | -1.396742 | H                   | 4.16635   | -2.612679 | -1.418953 |
| O                  | 4.978321  | -1.418064 | -2.900803 | O                   | 4.807261  | -1.521621 | -2.996949 |

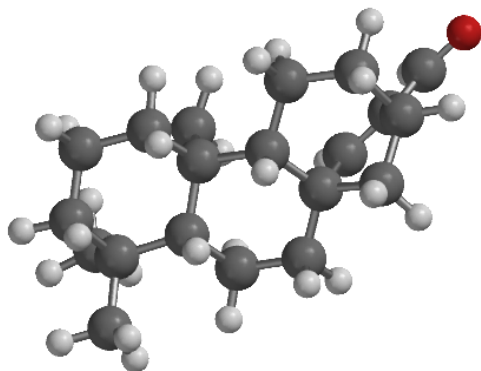

Starting structure  
enantiomer of 8 $\beta$ ,13 $\beta$ -Kaur-15-en-17-al  
(5*R*, 8*R*, 9*S*, 10*R*, 13*S*-form)

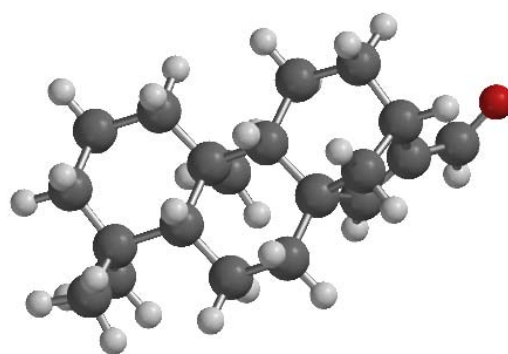

Optimized structure  
enantiomer of 8 $\beta$ ,13 $\beta$ -Kaur-15-en-17-al  
(5*R*, 8*R*, 9*S*, 10*R*, 13*S*-form)

**Figure S14.** Conformation analysis and calculation of ECD spectra of enantiomer of 8 $\beta$ ,13 $\beta$ -kaur-15-en-17-al. 8 $\beta$ ,13 $\beta$ -Kaur-15-en-17-al (5*S*, 8*S*, 9*R*, 10*S*, 13*R*-form) was the same as NMR calculation. The starting and optimized structures of the enantiomer, 5*R*, 8*R*, 9*S*, 10*R*, 13*S*-form, was following the table.

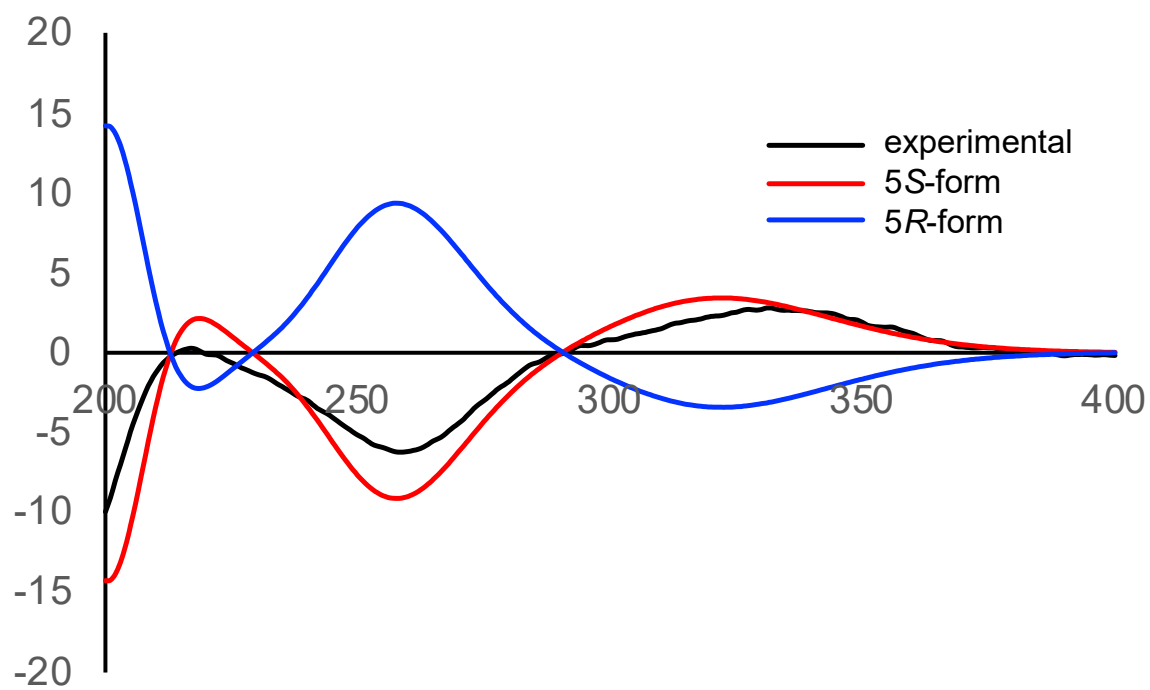

**Figure S15.** Experimental and calculated ECD spectra of **1**.

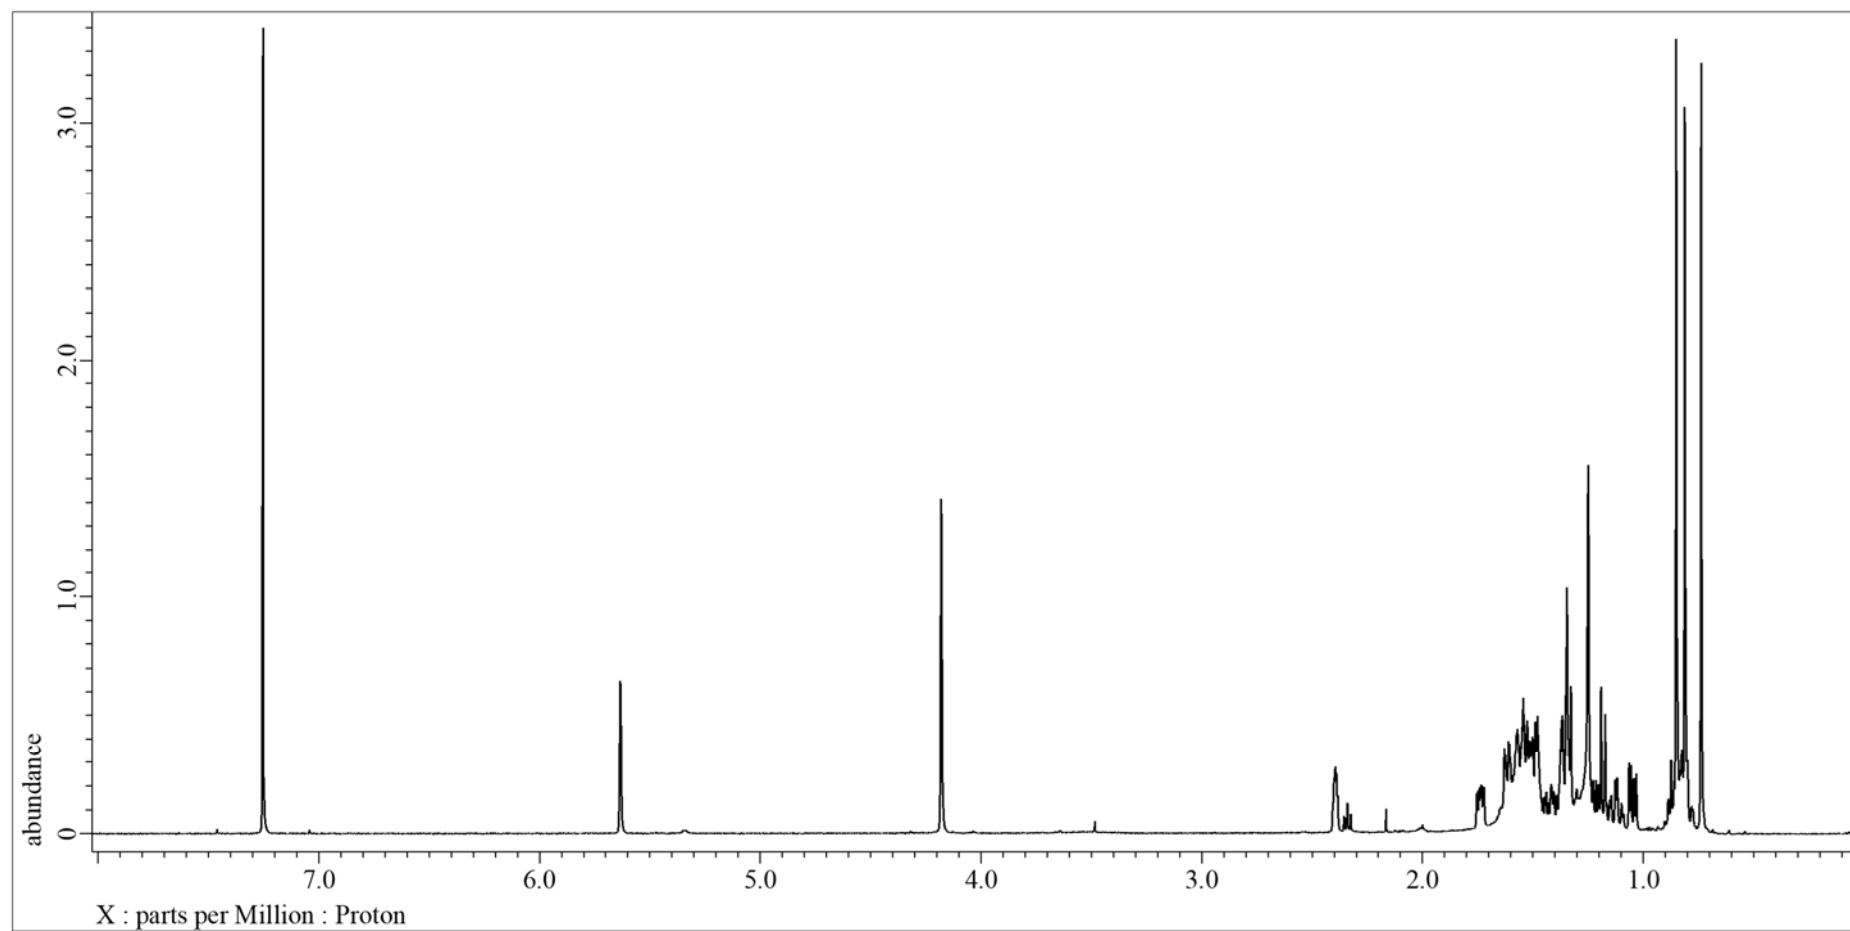

**Figure S16.**  $^1\text{H}$  NMR spectrum of **2**.

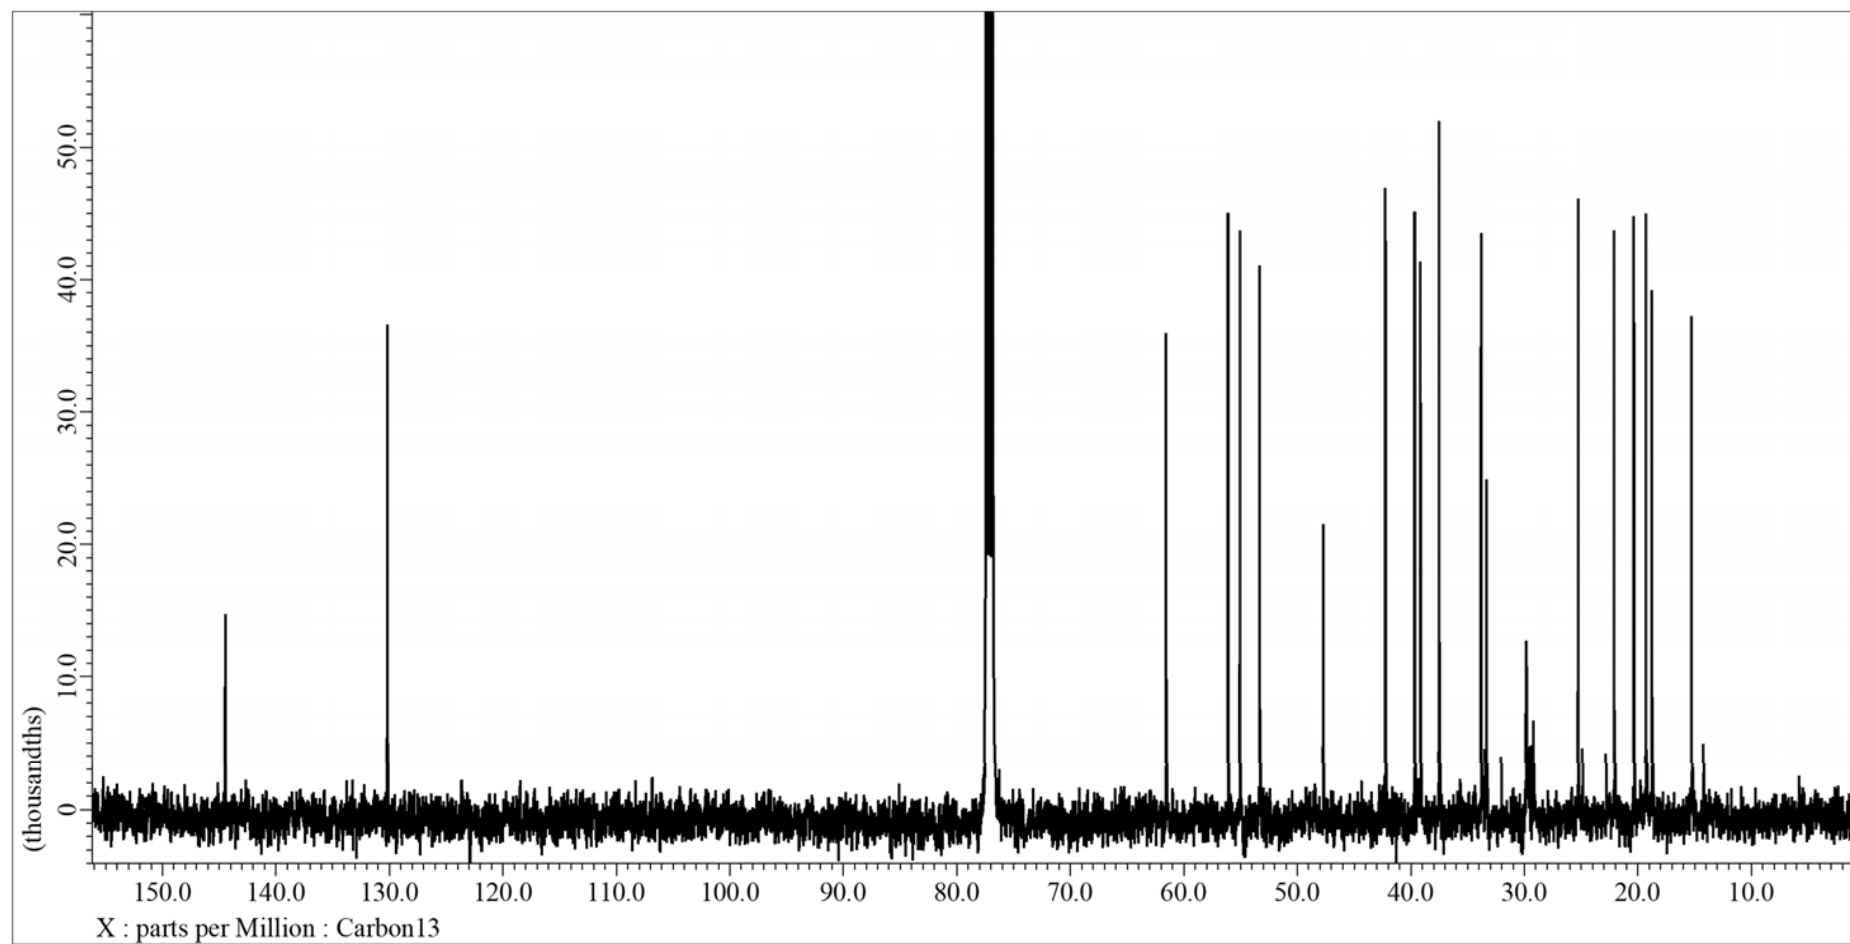

**Figure S17.**  $^{13}\text{C}$  NMR spectrum of **2**.

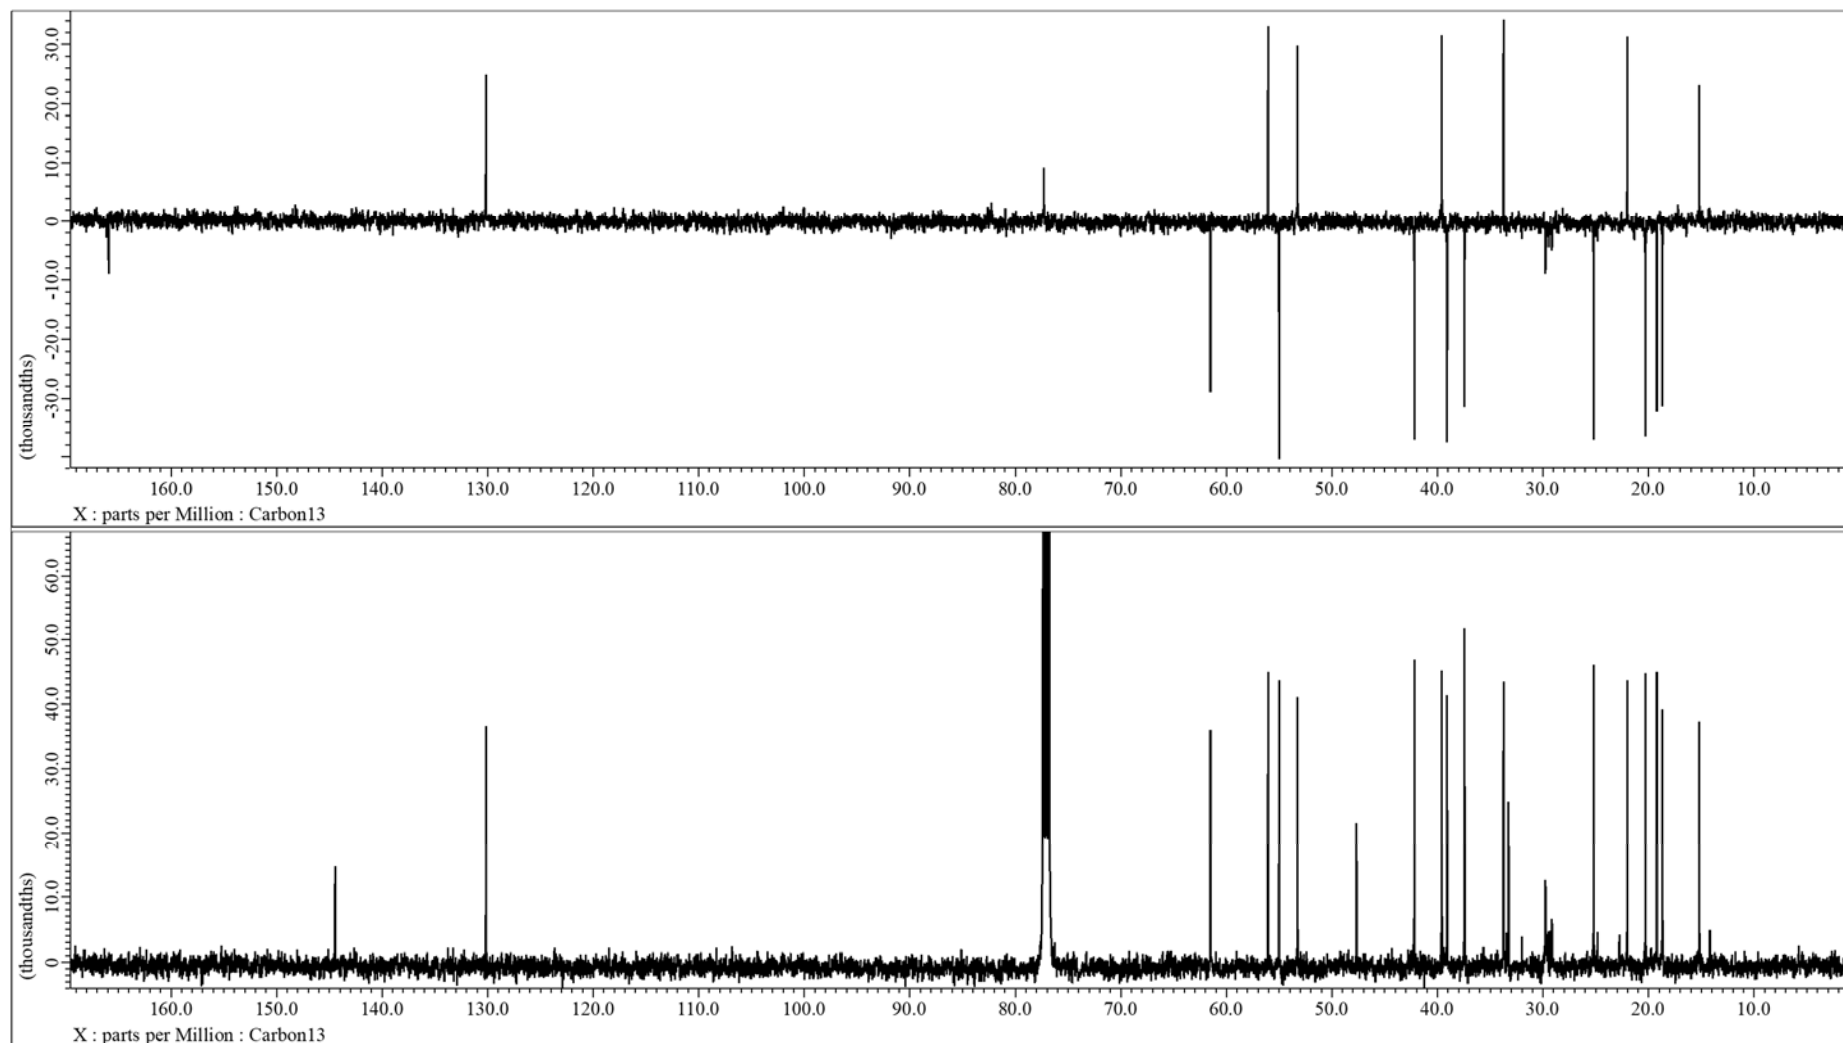

**Figure S18.** DEPT-135 spectrum of **2**.

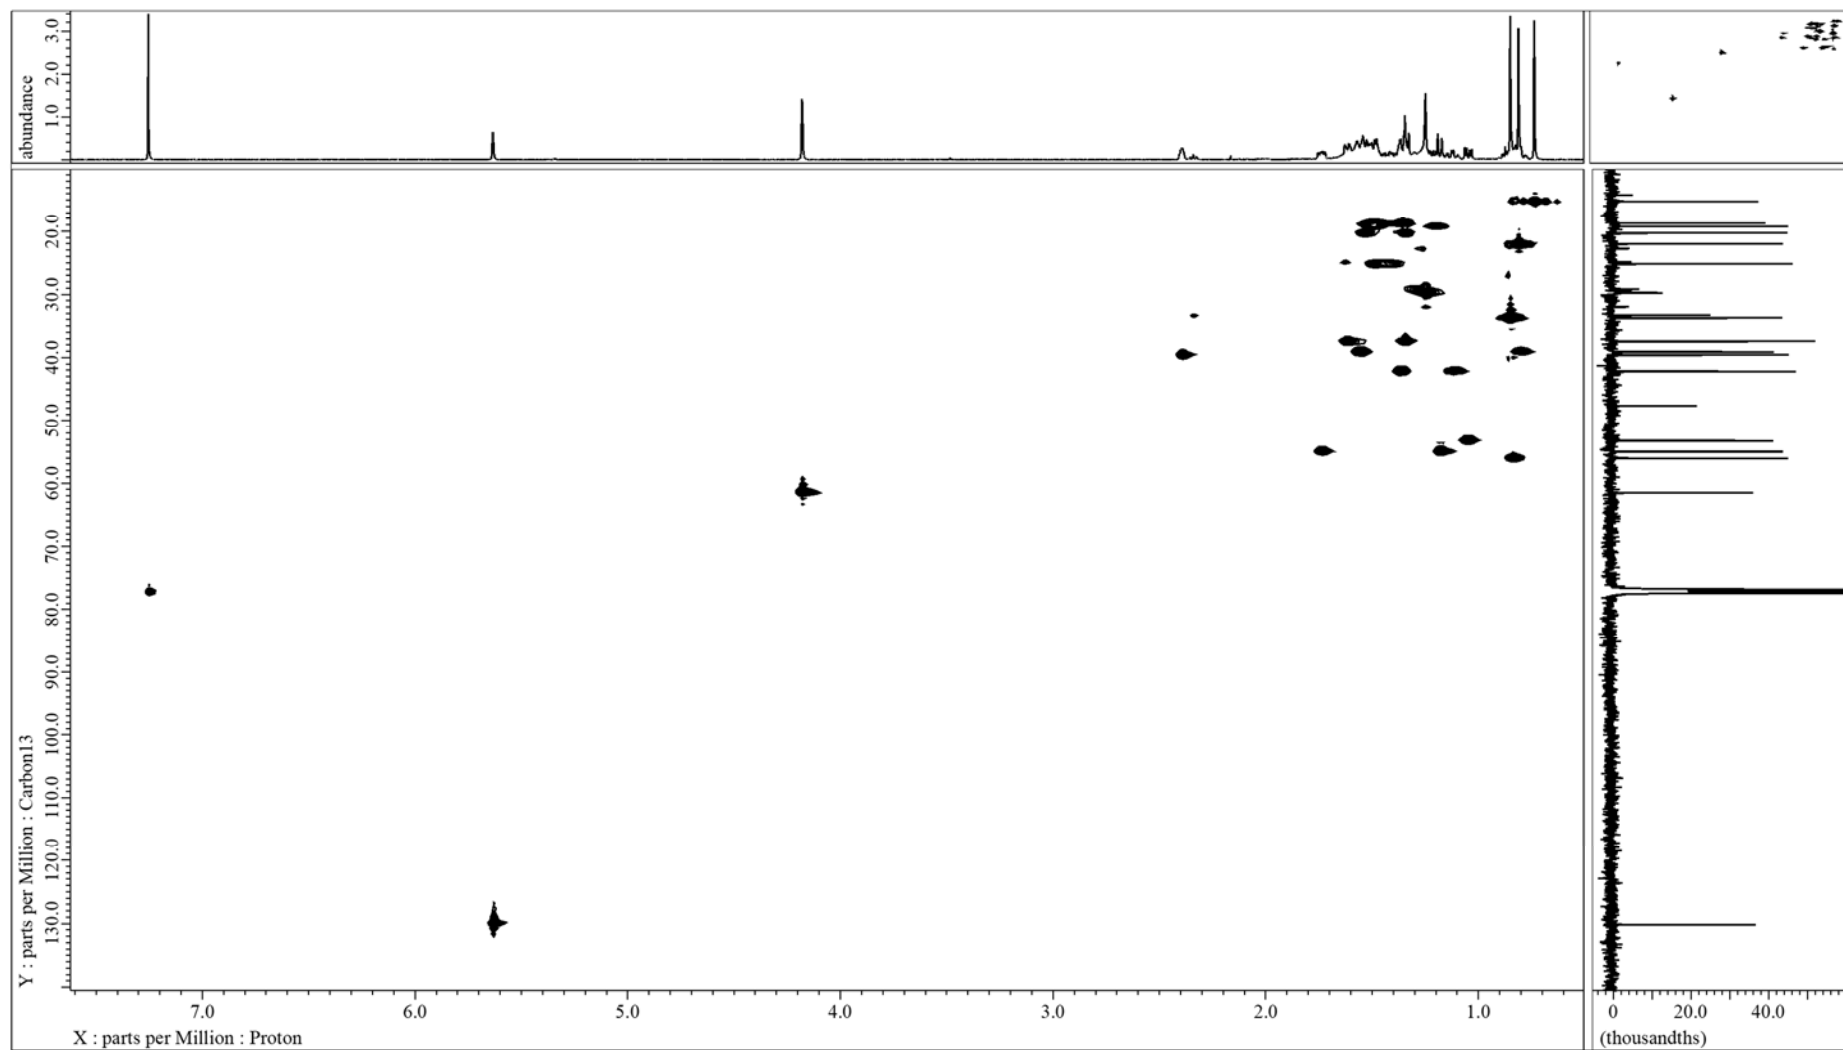

**Figure S19.** HSQC spectrum of **2**.

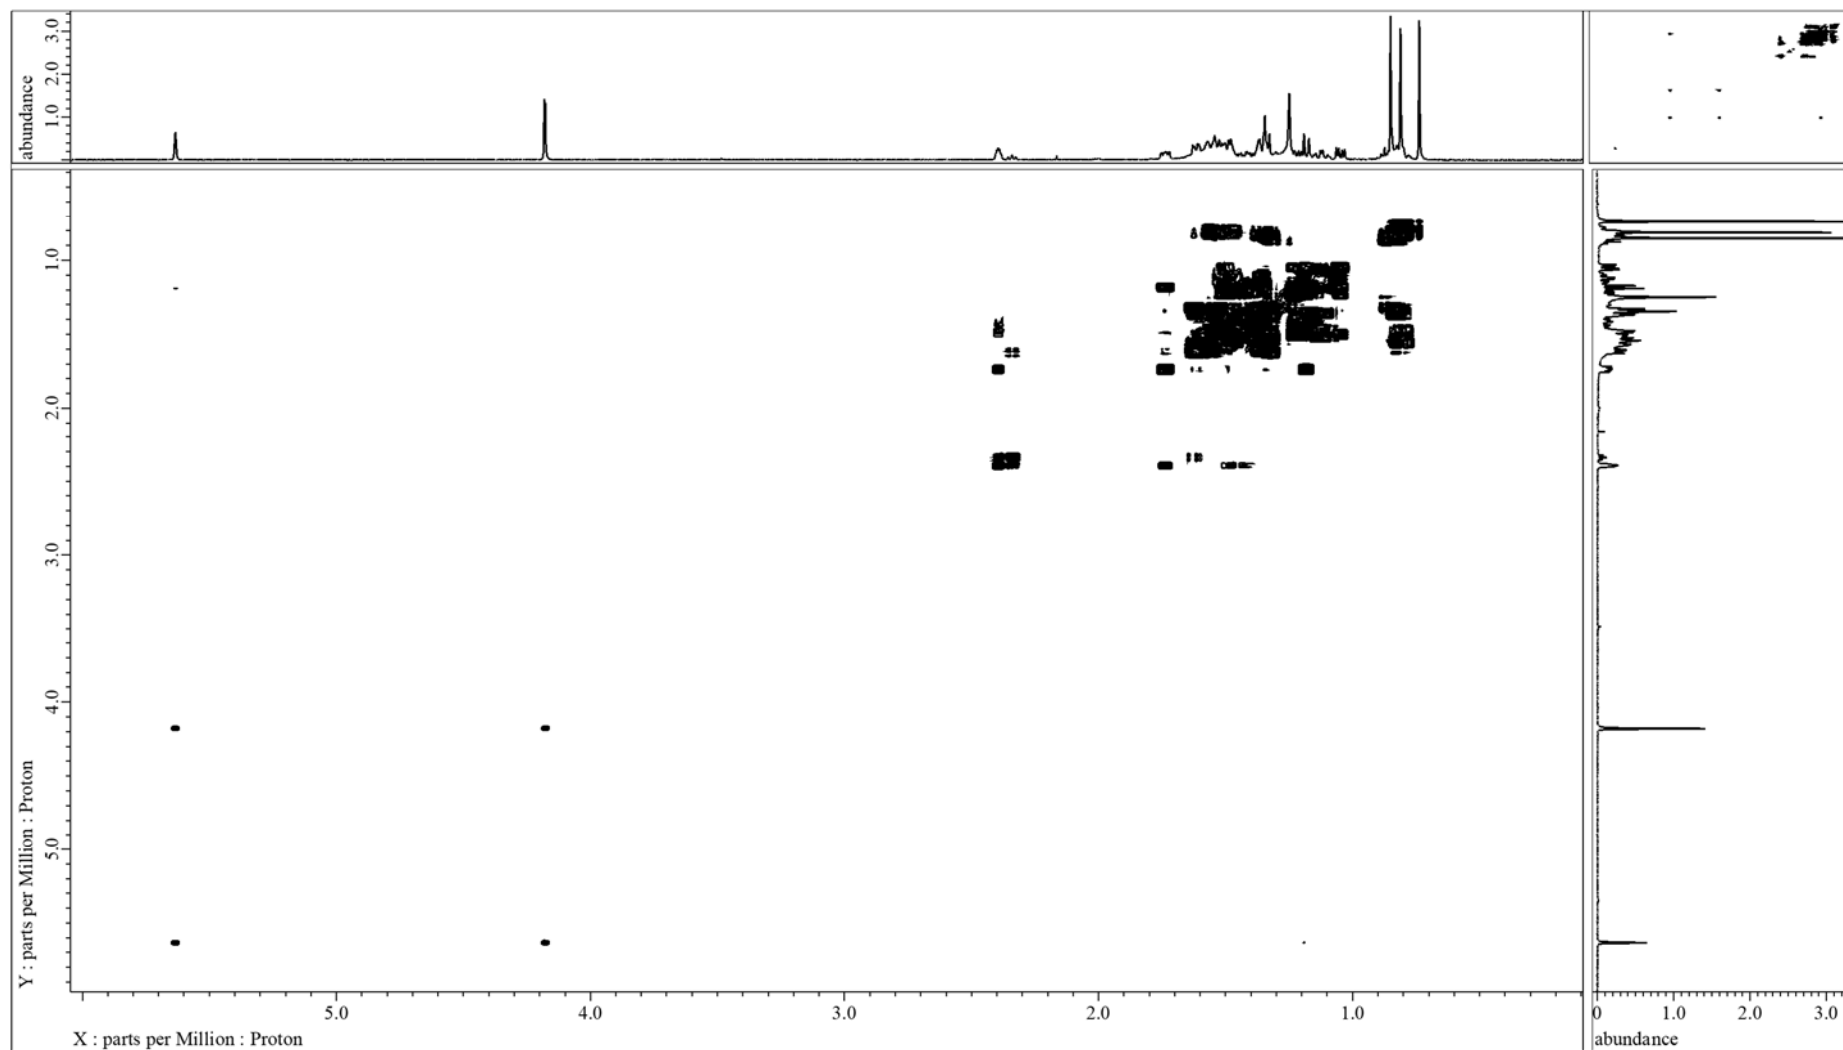

**Figure S20.** DQF-COSY spectrum of **2**.

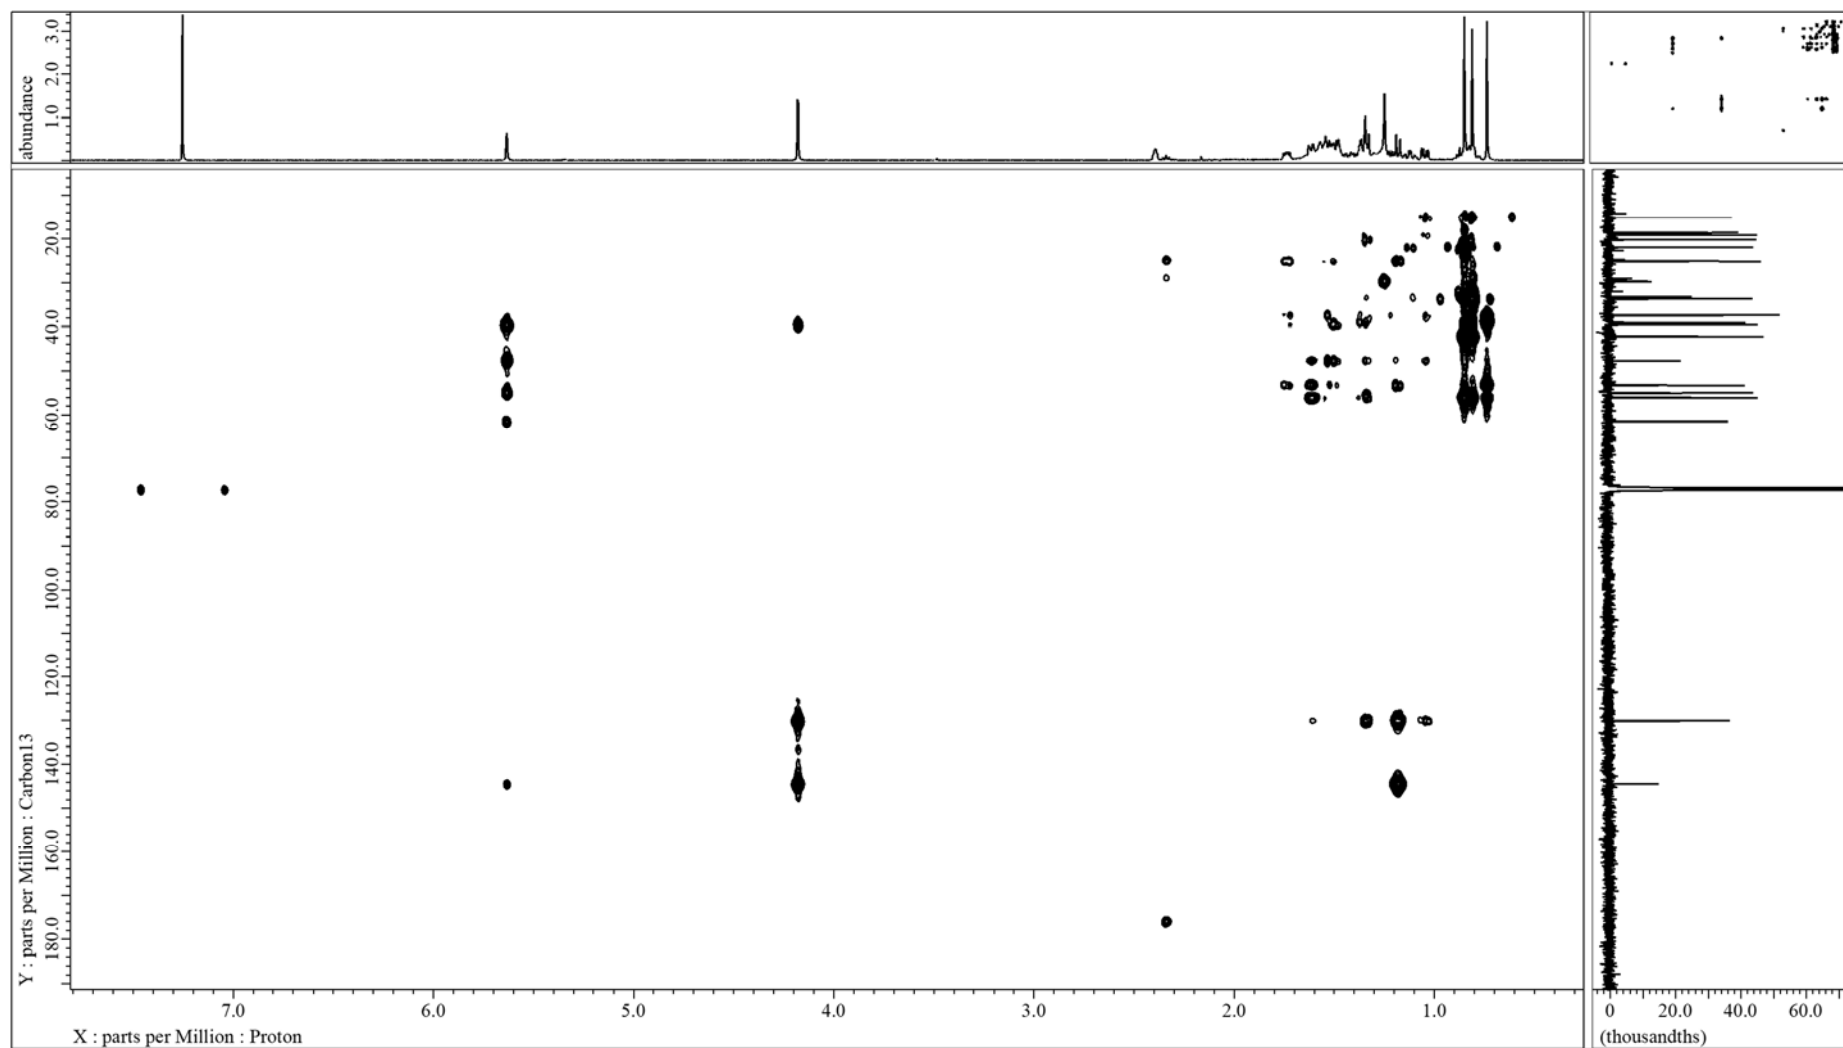

**Figure S21.** HMBC spectrum of **2**.



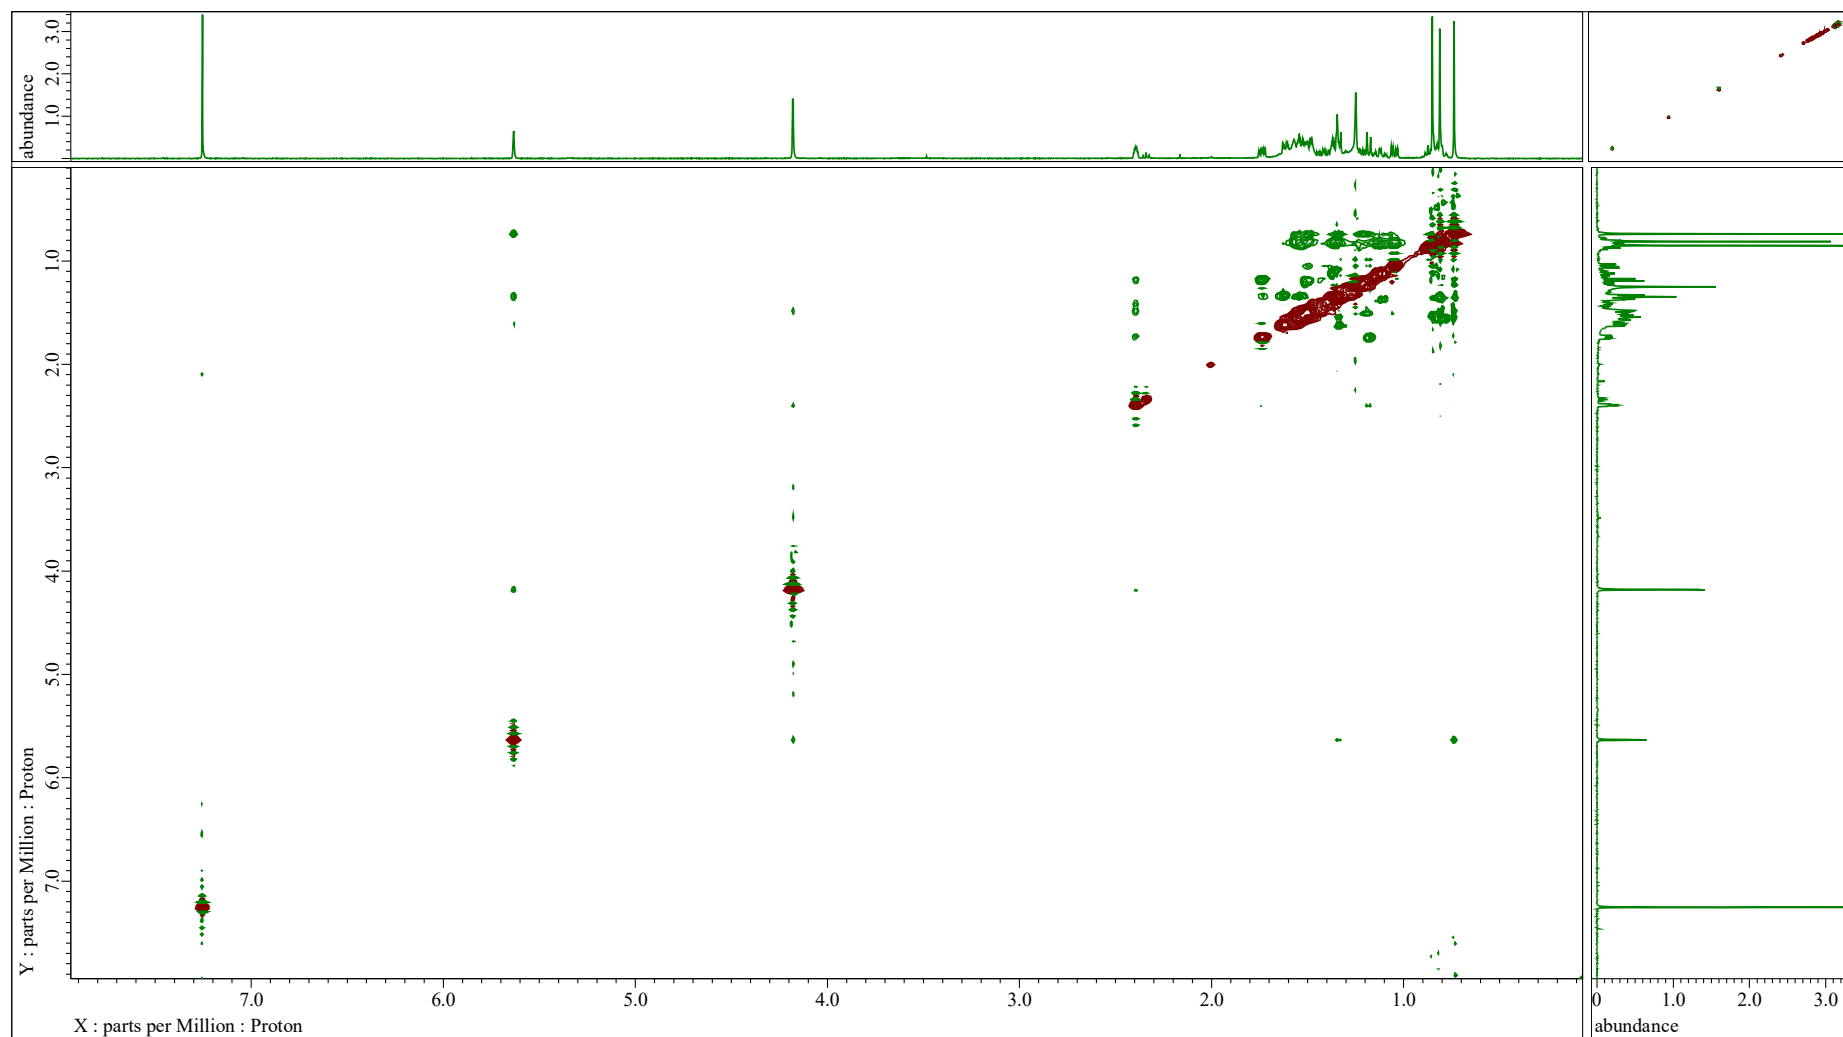

**Figure S22.** NOESY spectrum of **2**.

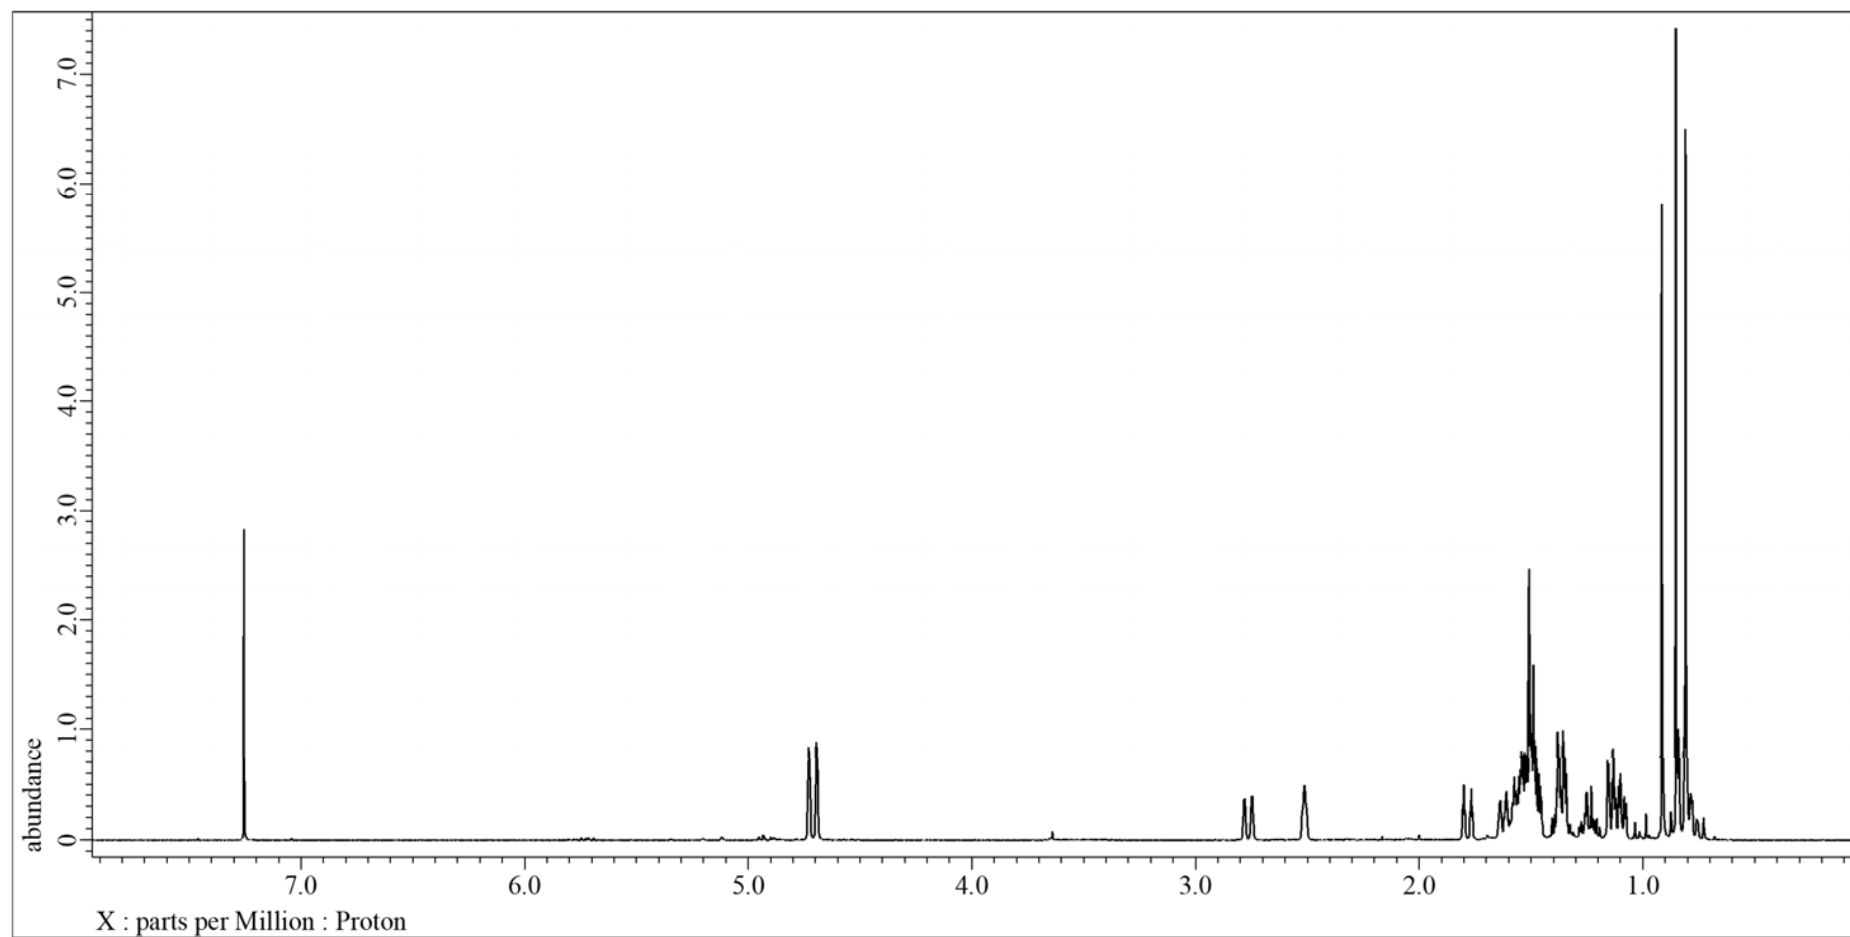

**Figure S23.**  $^1\text{H}$  NMR spectrum of **3**.

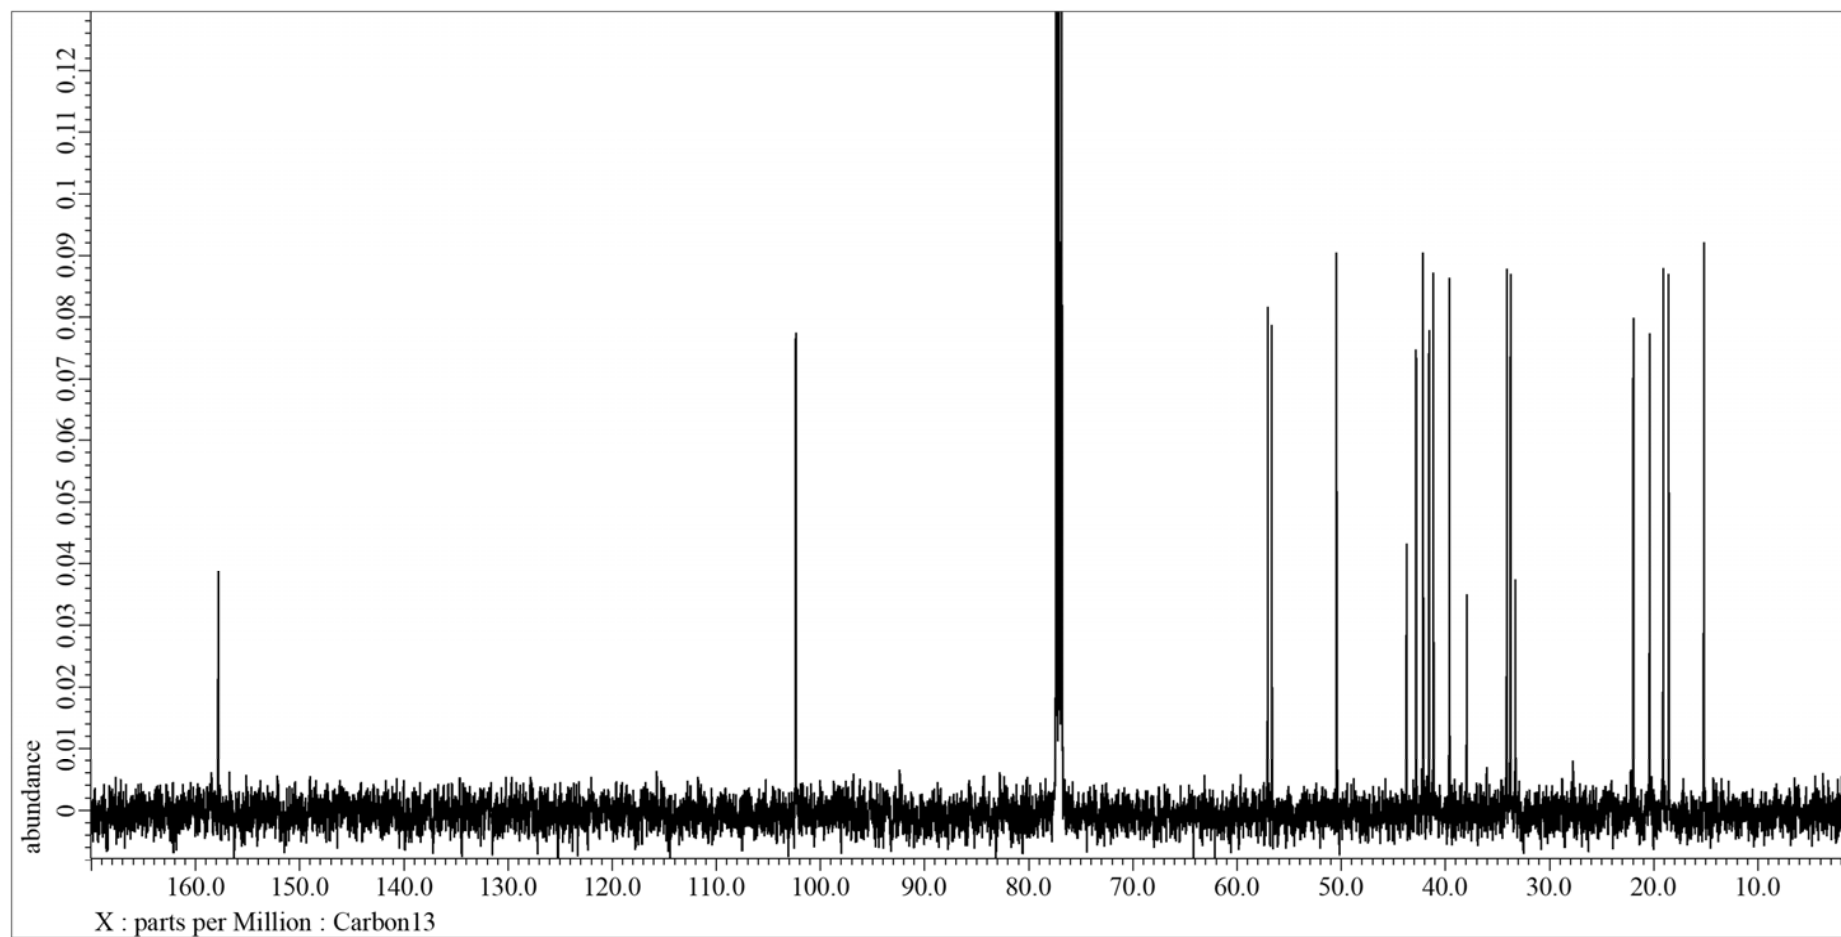

**Figure S24.**  $^{13}\text{C}$  NMR spectrum of **3**.

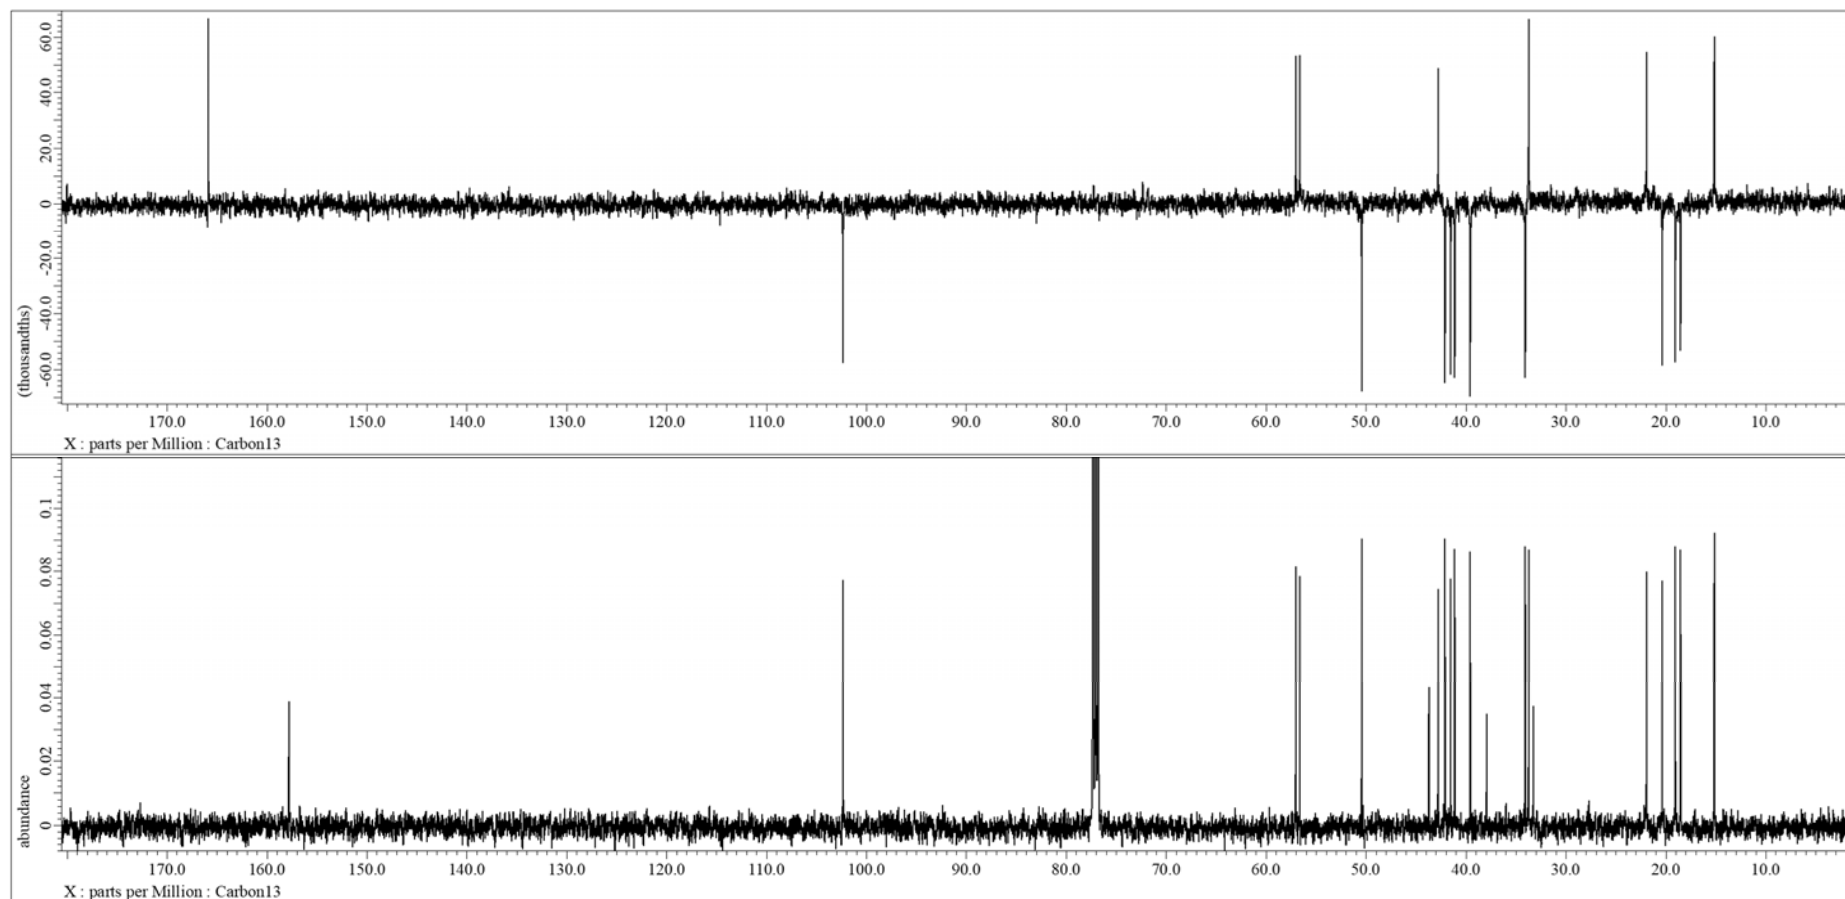

**Figure S25.** DEPT-135 spectrum of **3**.

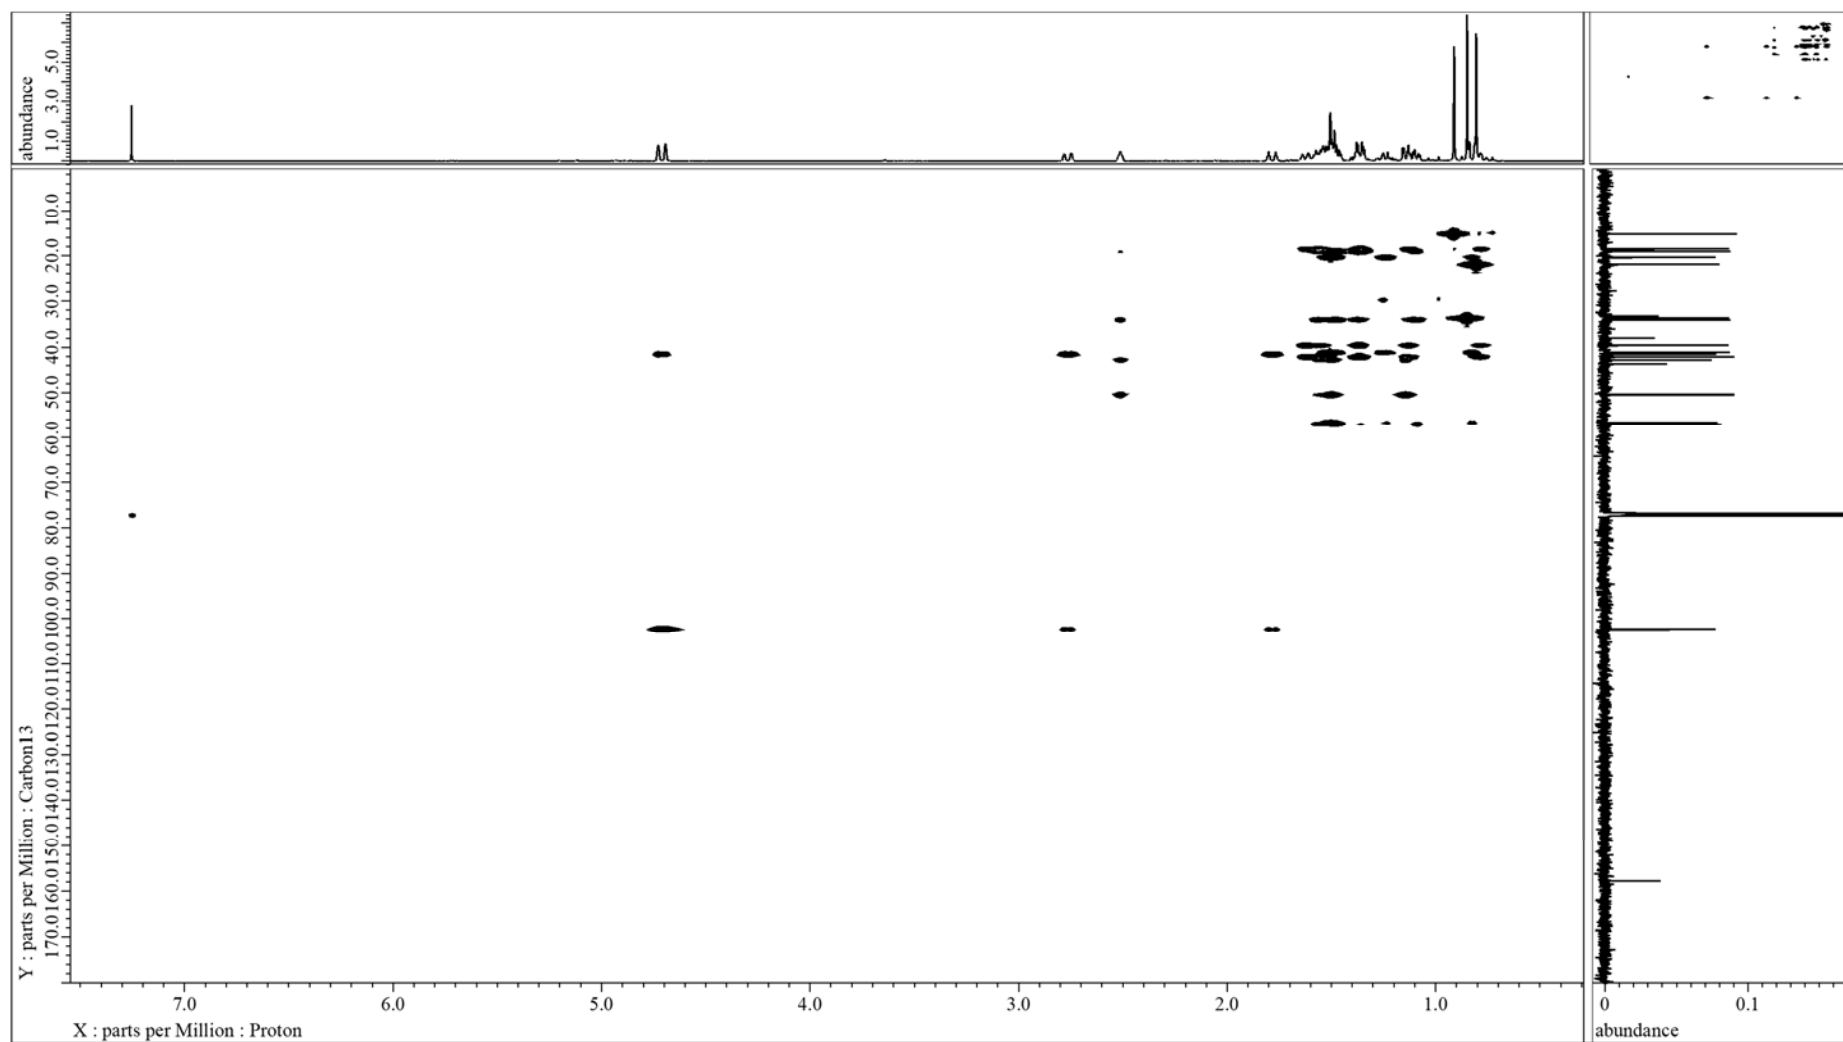

**Figure S26.** HSQC-TOCSY spectrum of **3**.

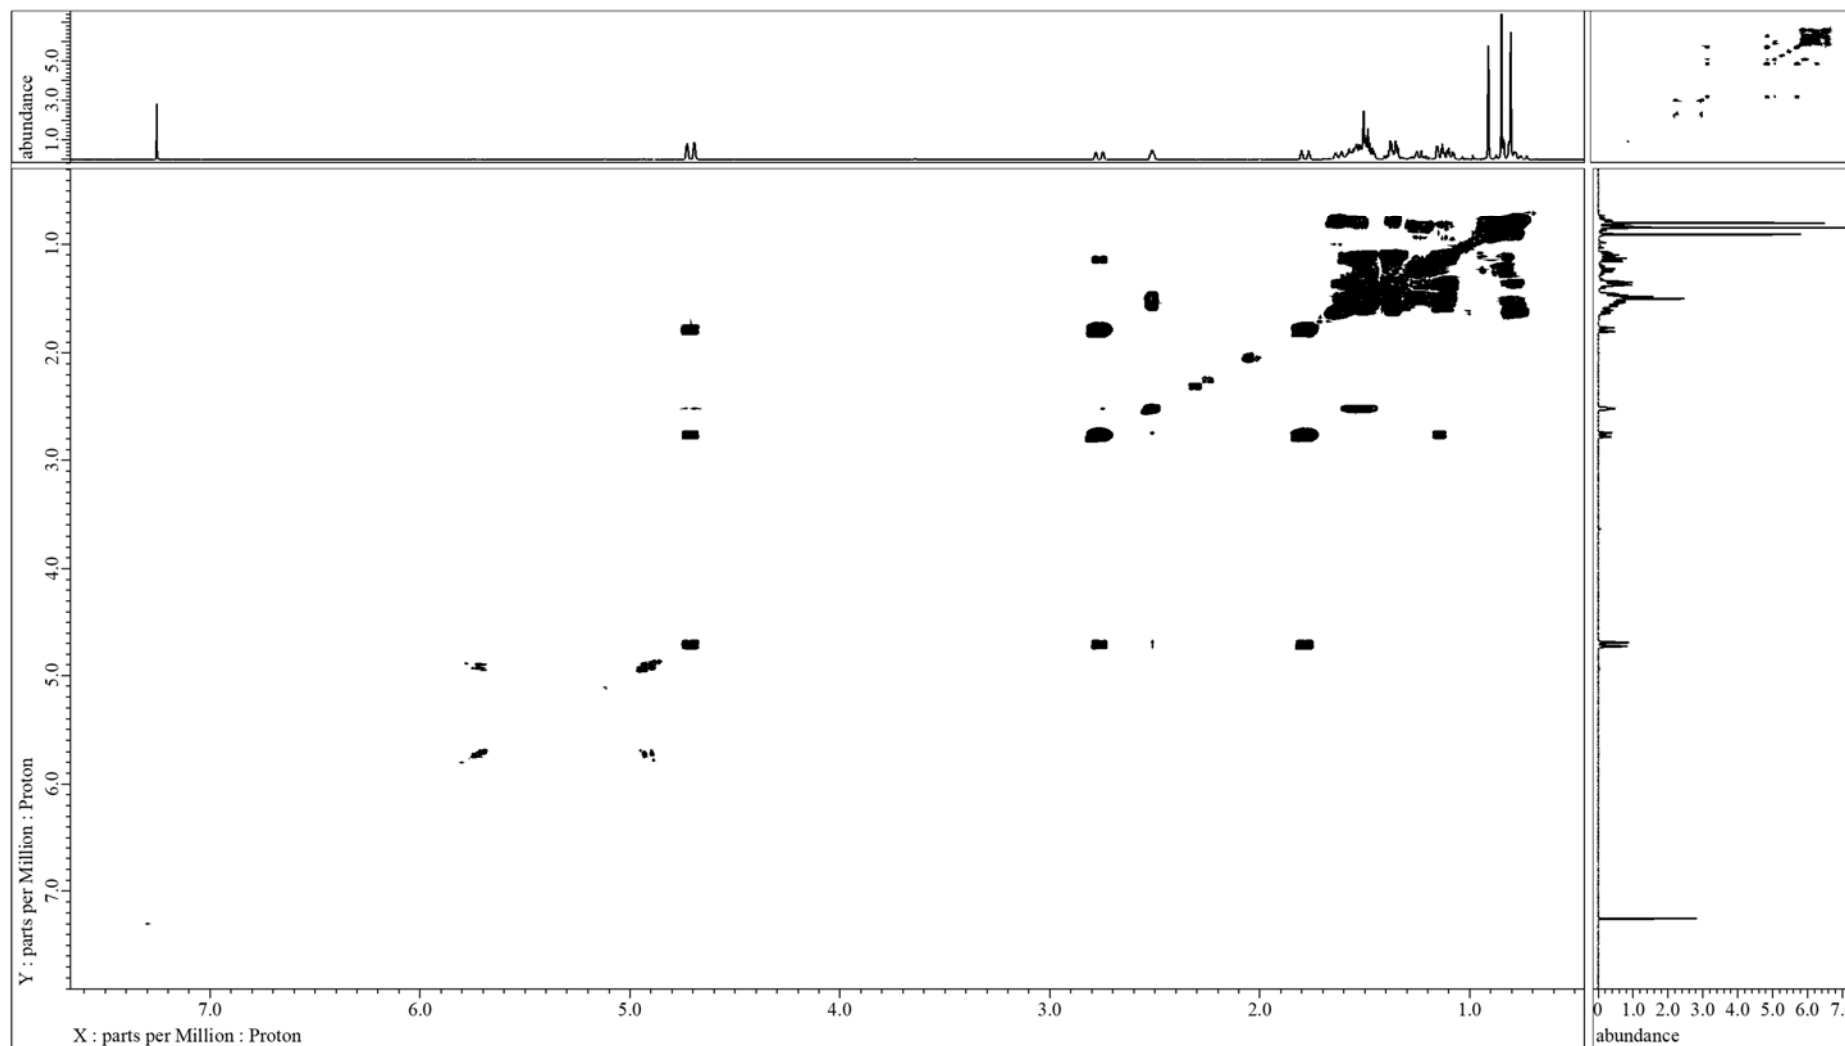

**Figure S27.** DQF-COSY spectrum of **3**.

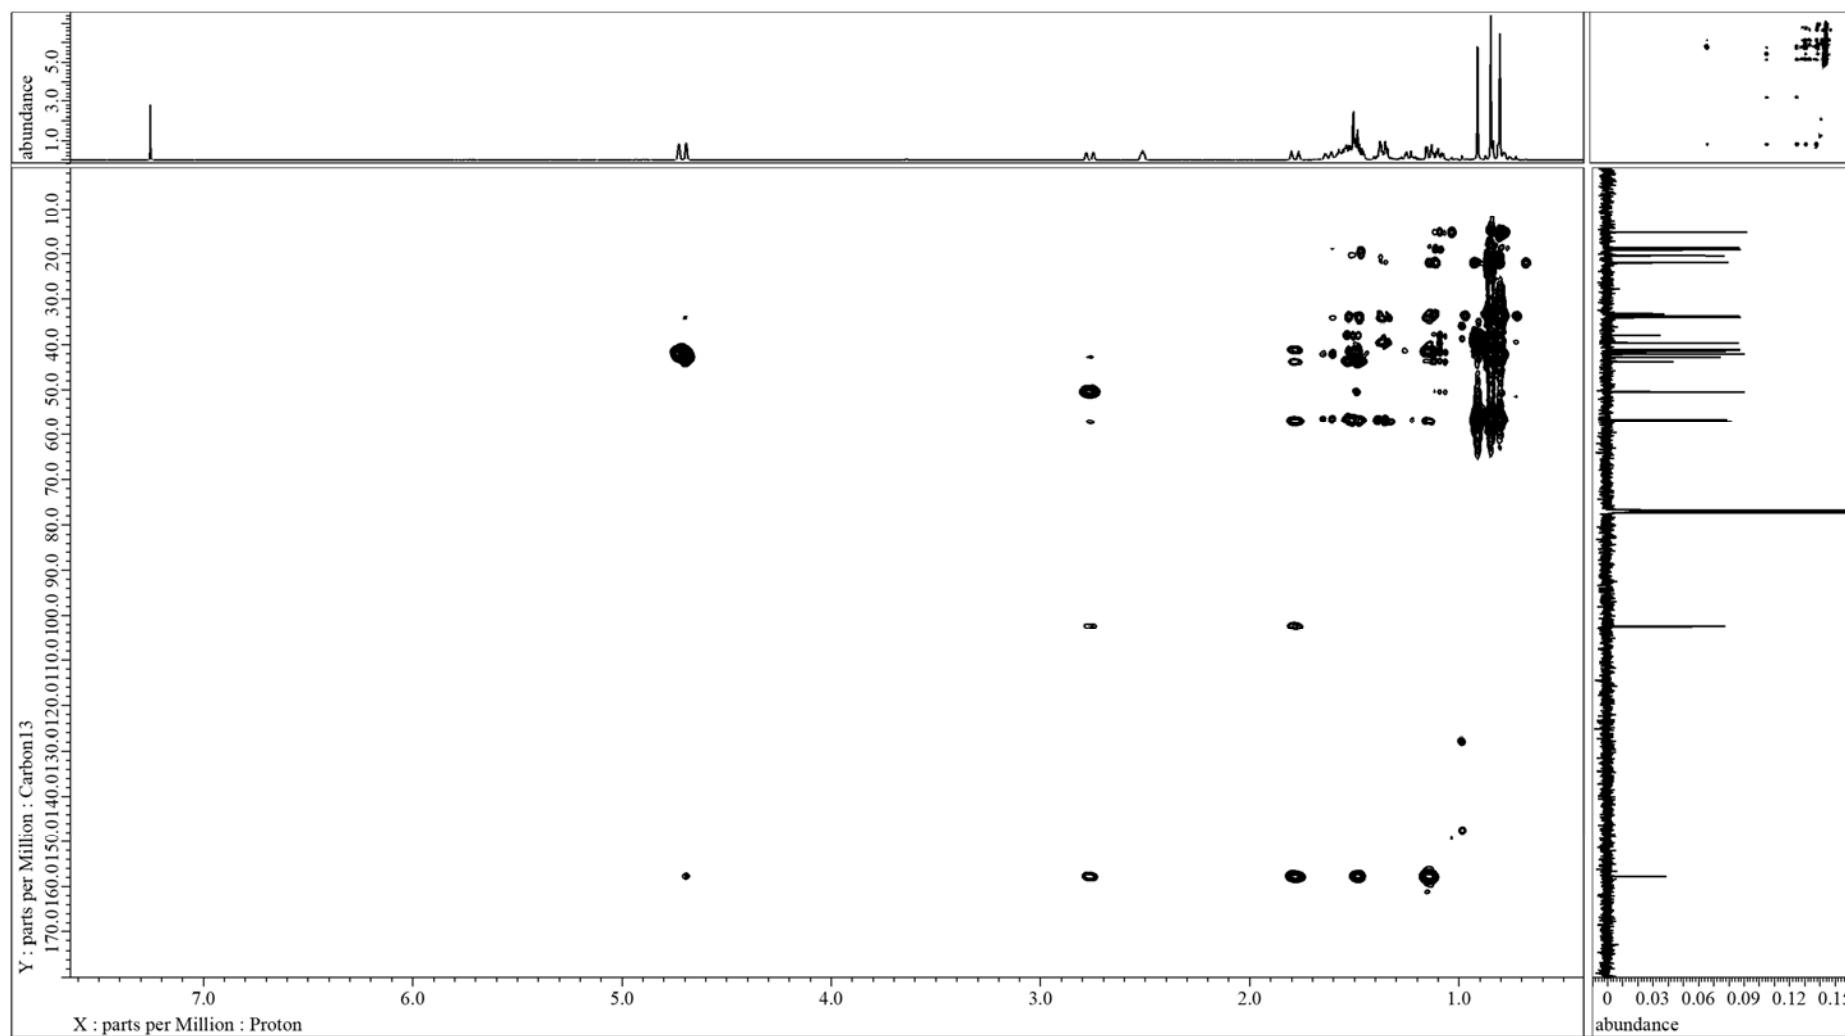

Figure S28. HMBC spectrum of **3**.

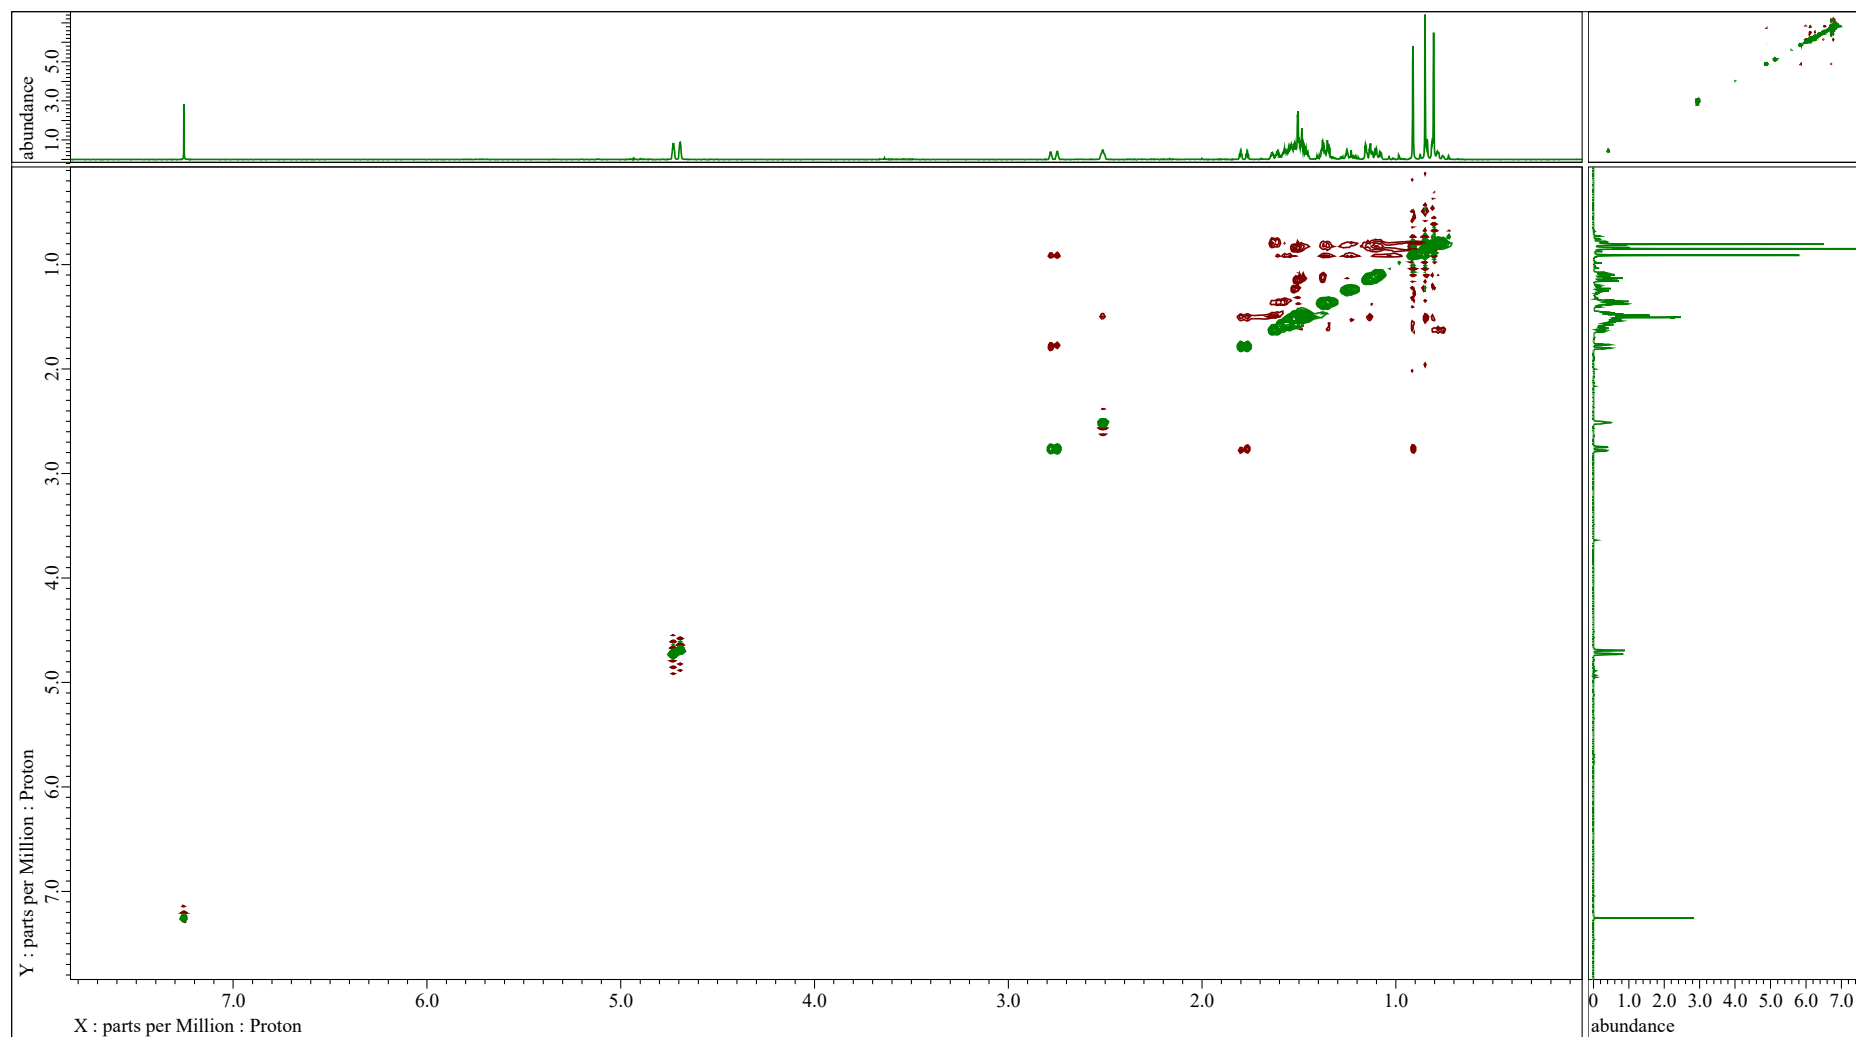

**Figure S29.** NOESY spectrum of **3**.



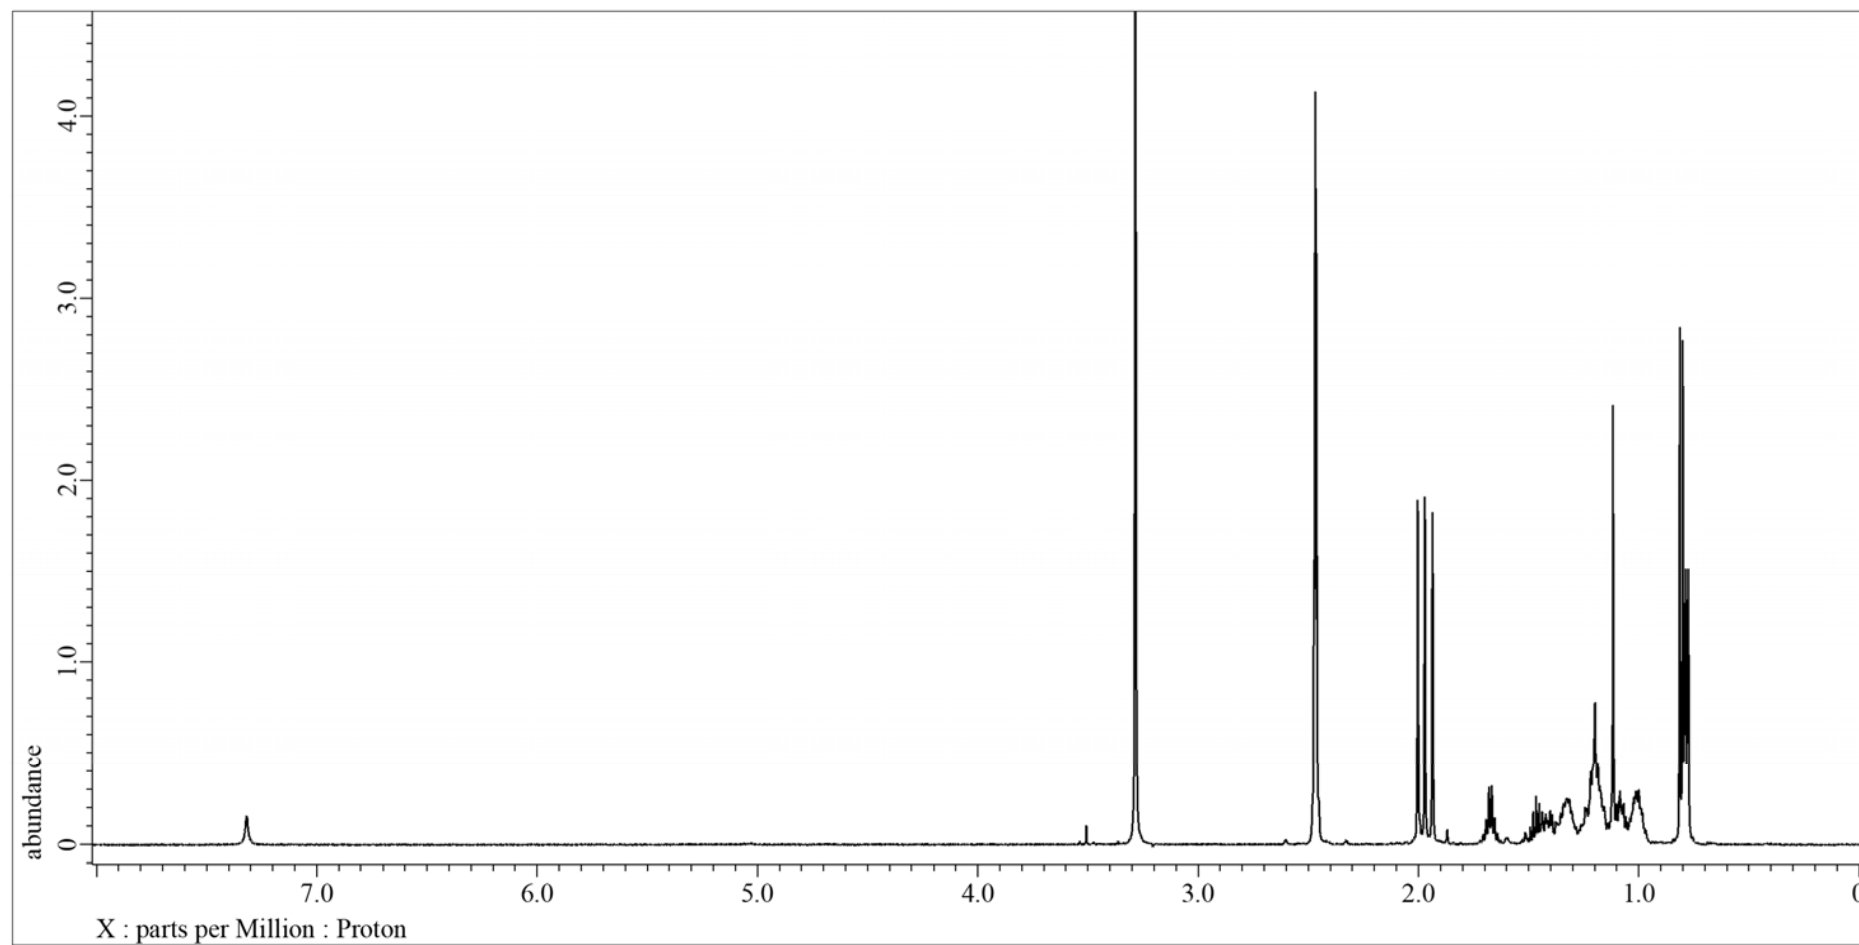

**Figure S30.**  $^1\text{H}$  NMR spectrum of **4**.

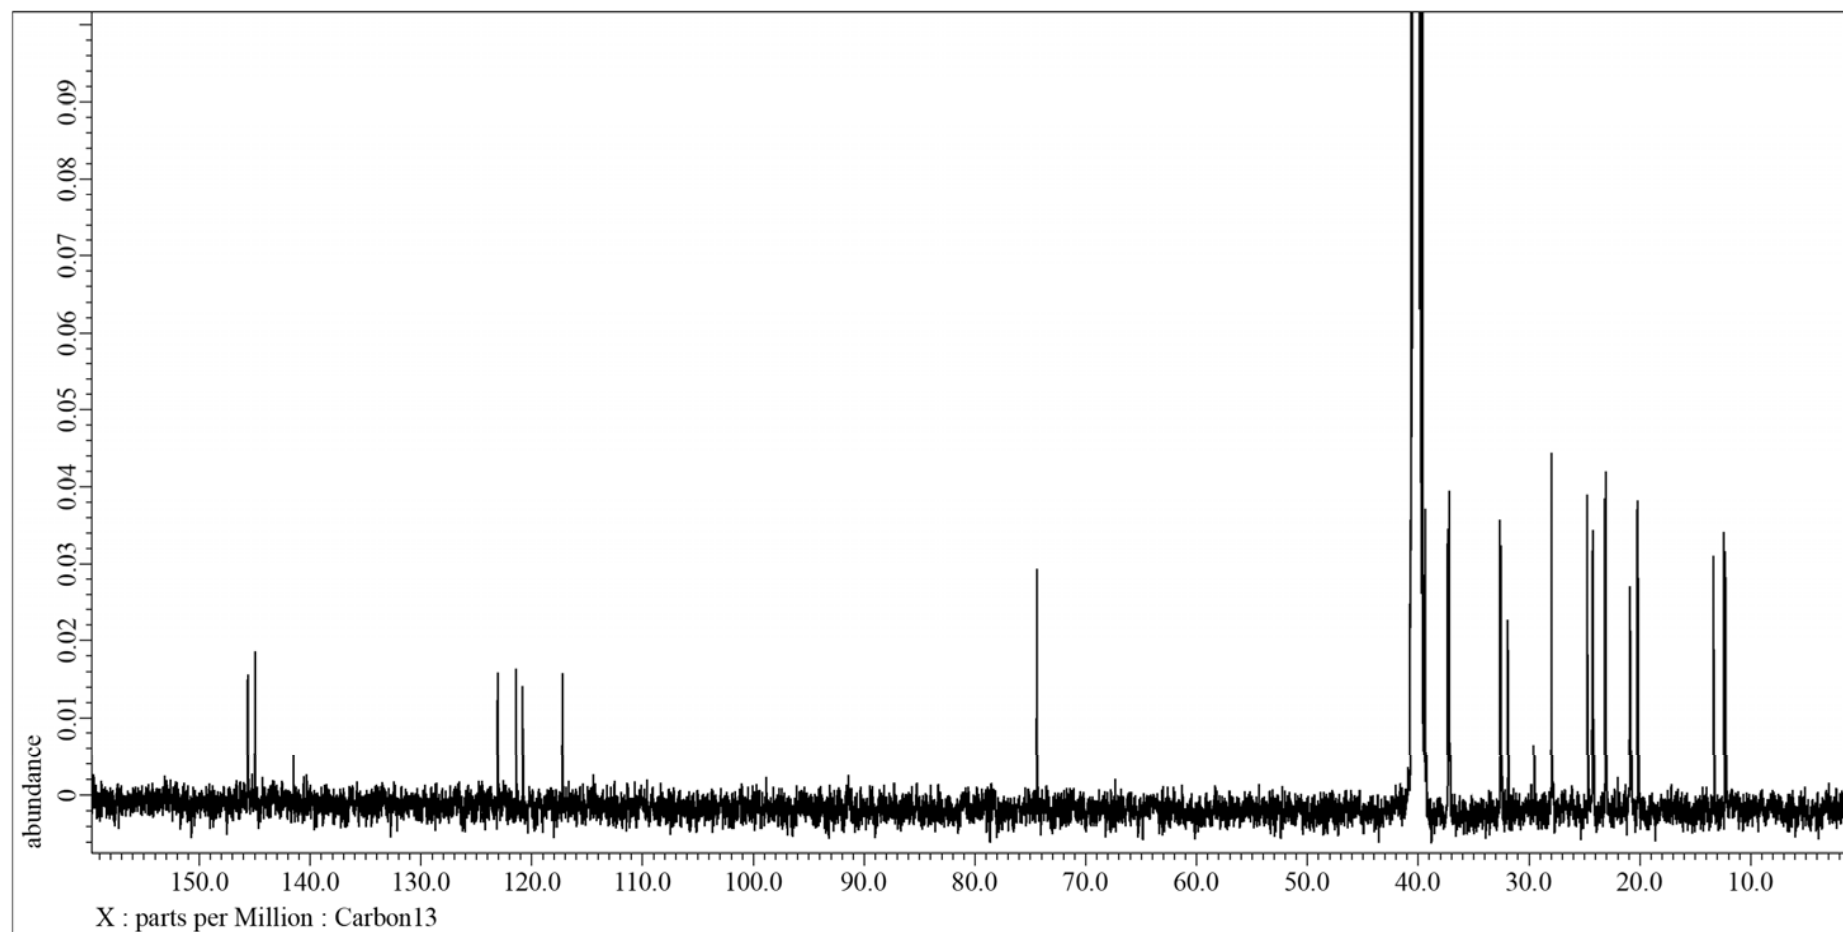

**Figure S31.**  $^{13}\text{C}$  NMR spectrum of **4**.

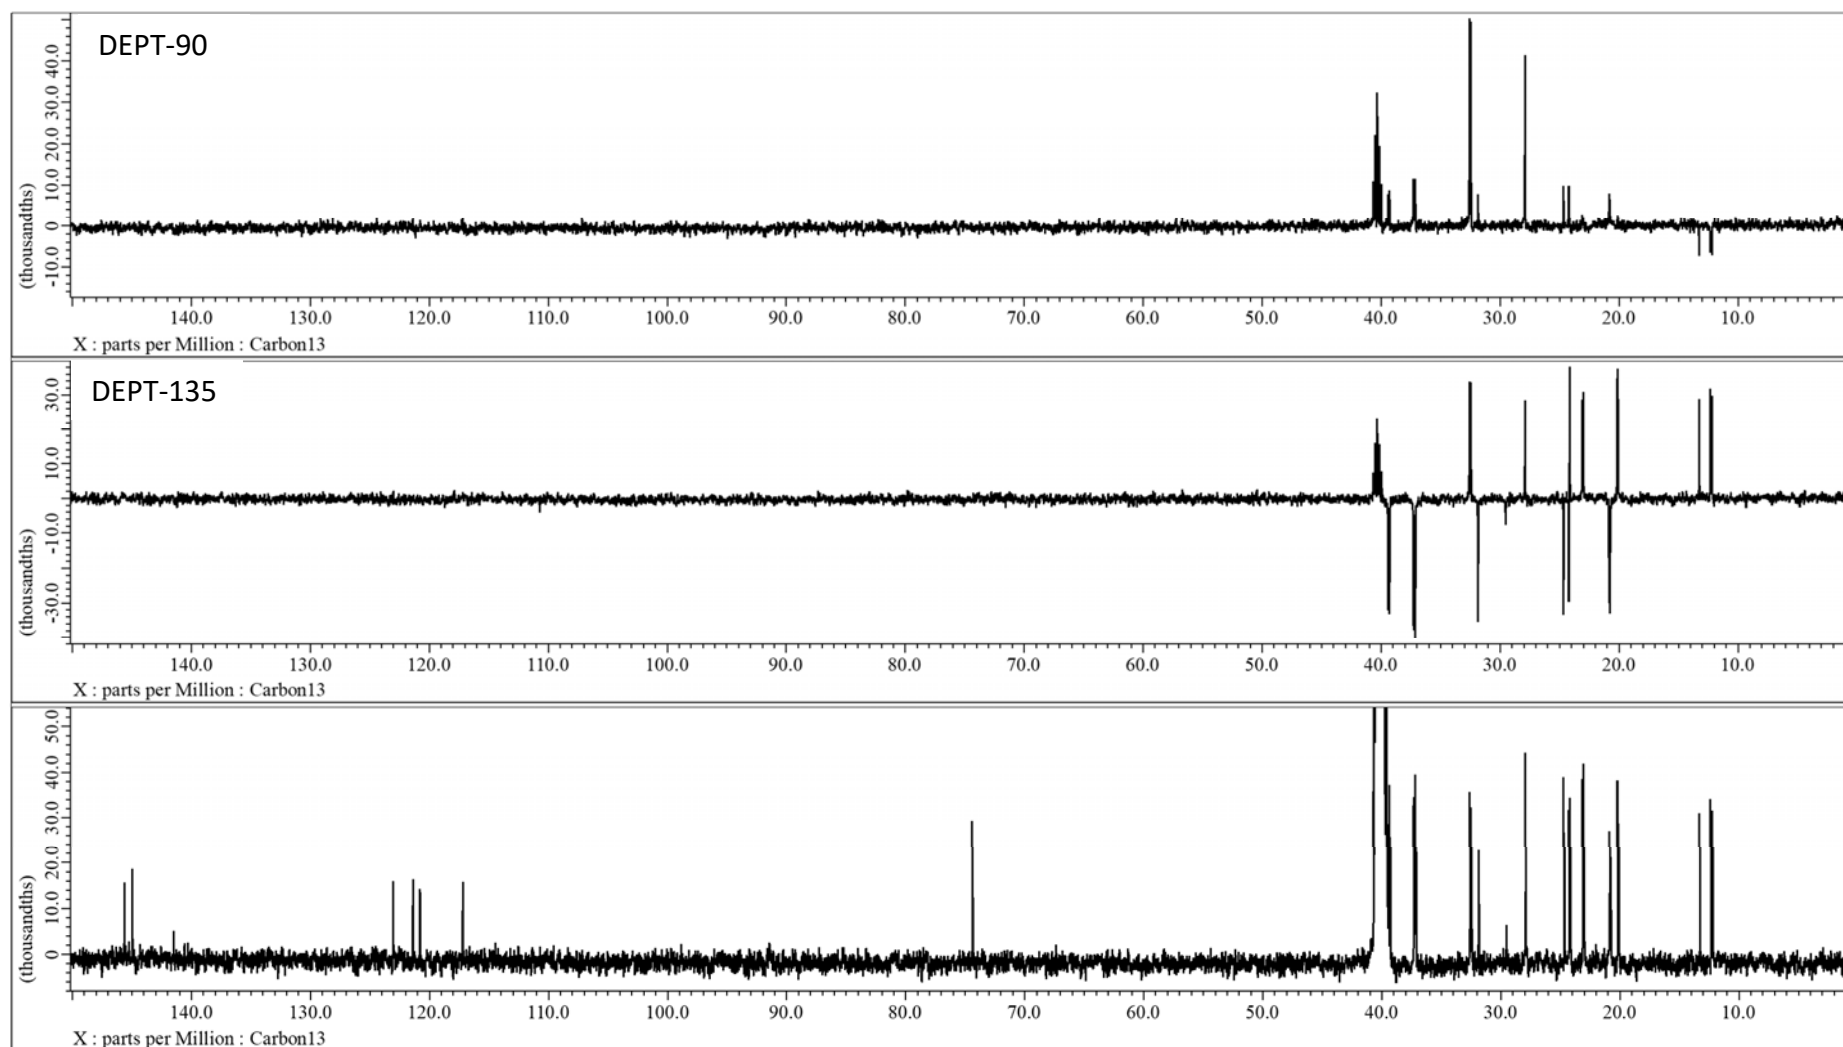

**Figure S32.** DEPT-90 and DEPT-135 experiments of **4**.

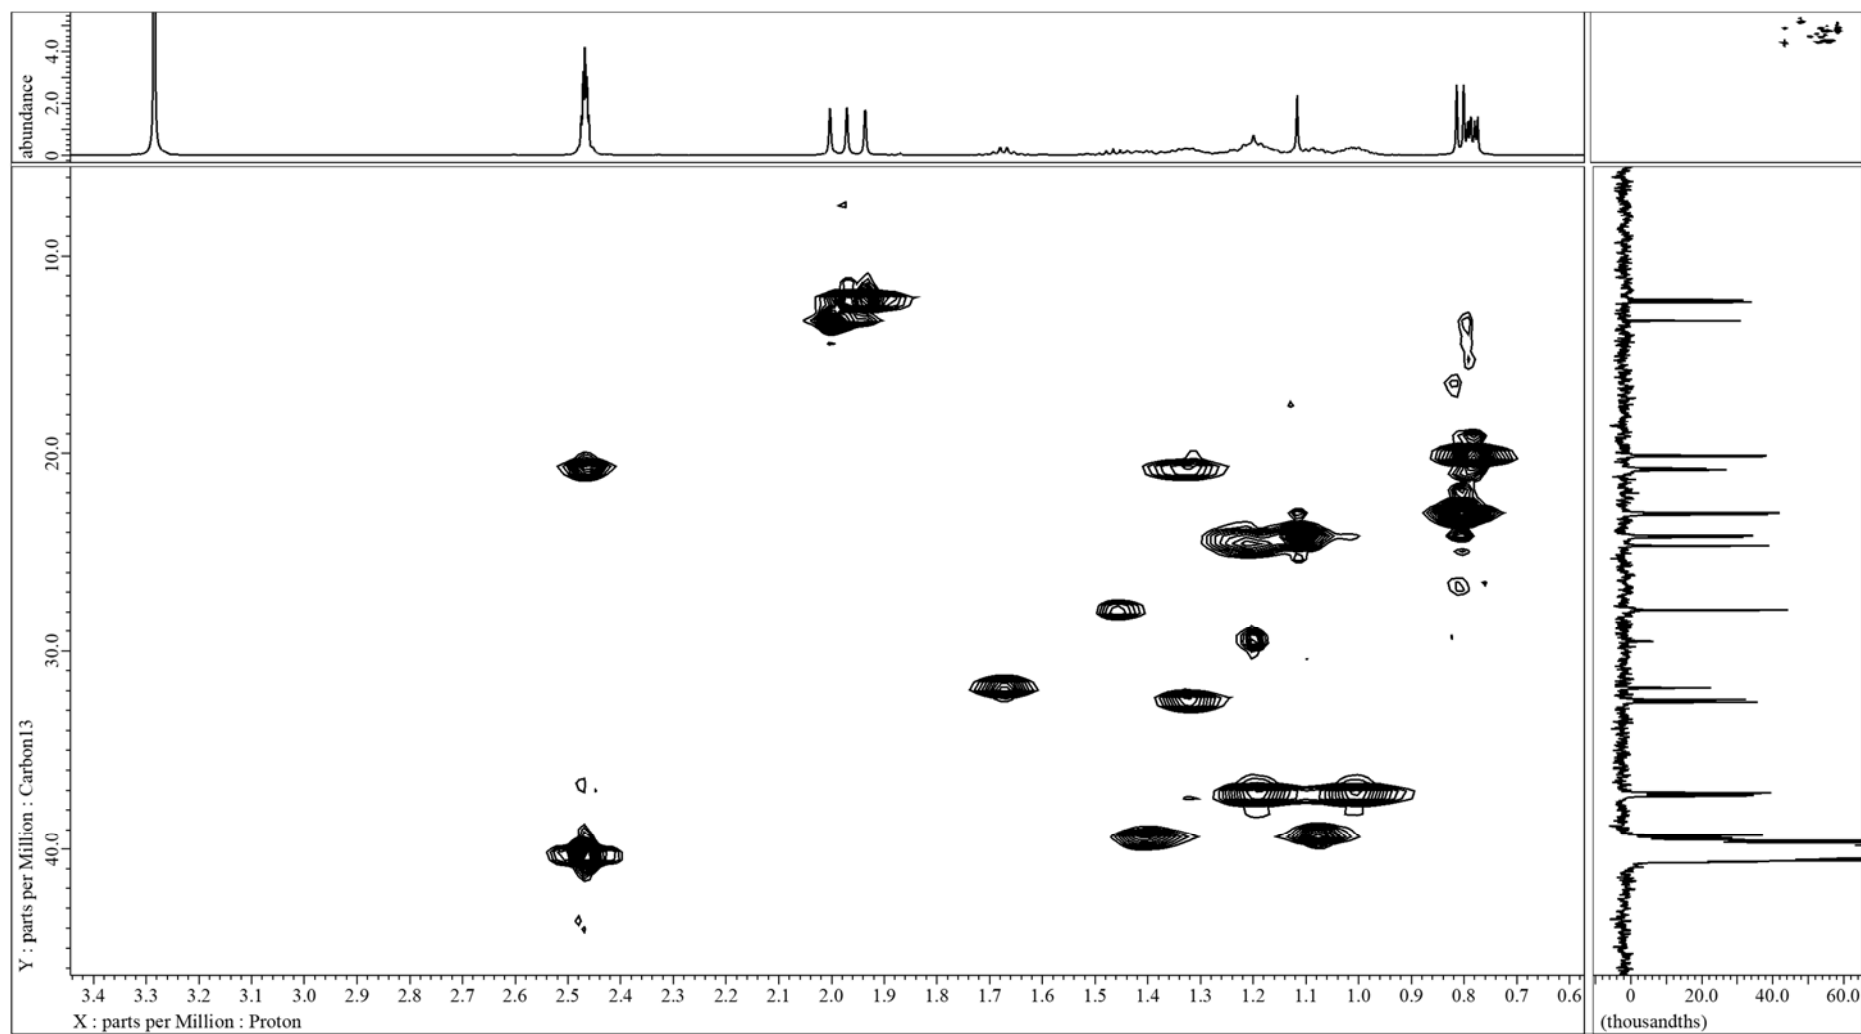

Figure S33. HSQC spectrum of 4.

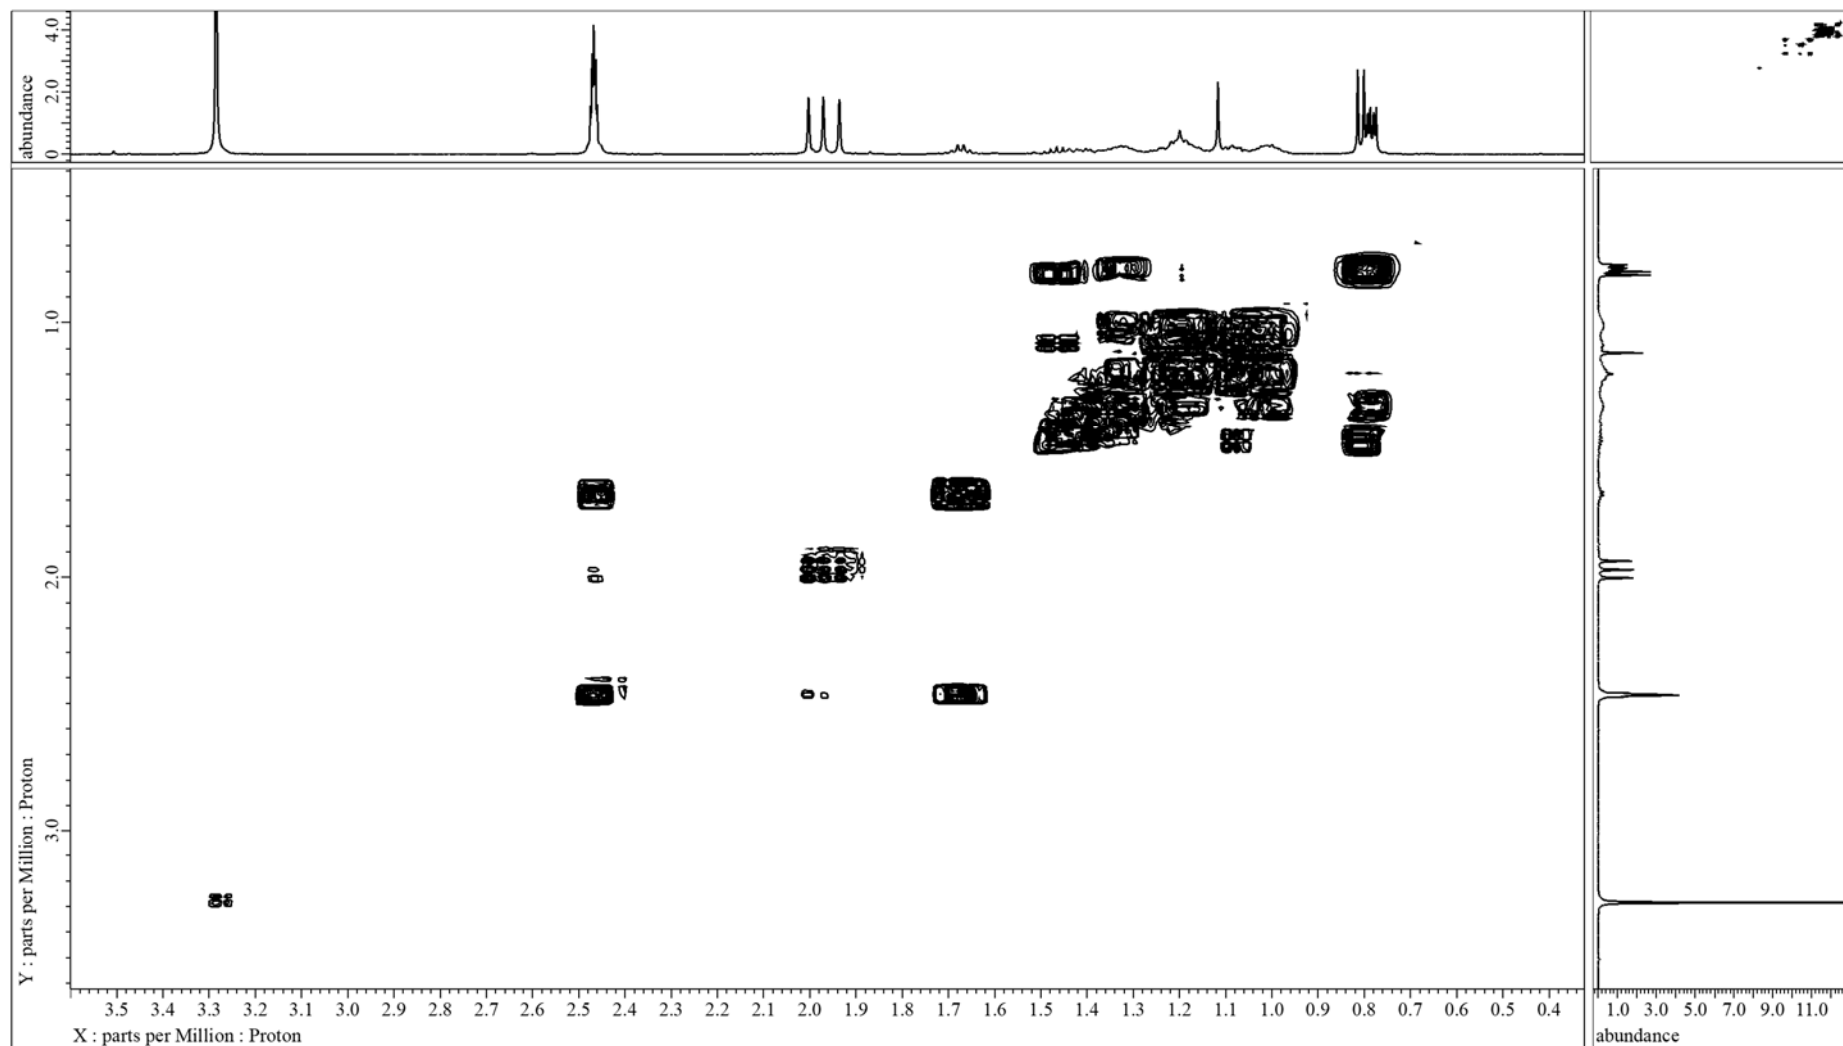

**Figure S34.** DQF-COSY spectrum of **4**.

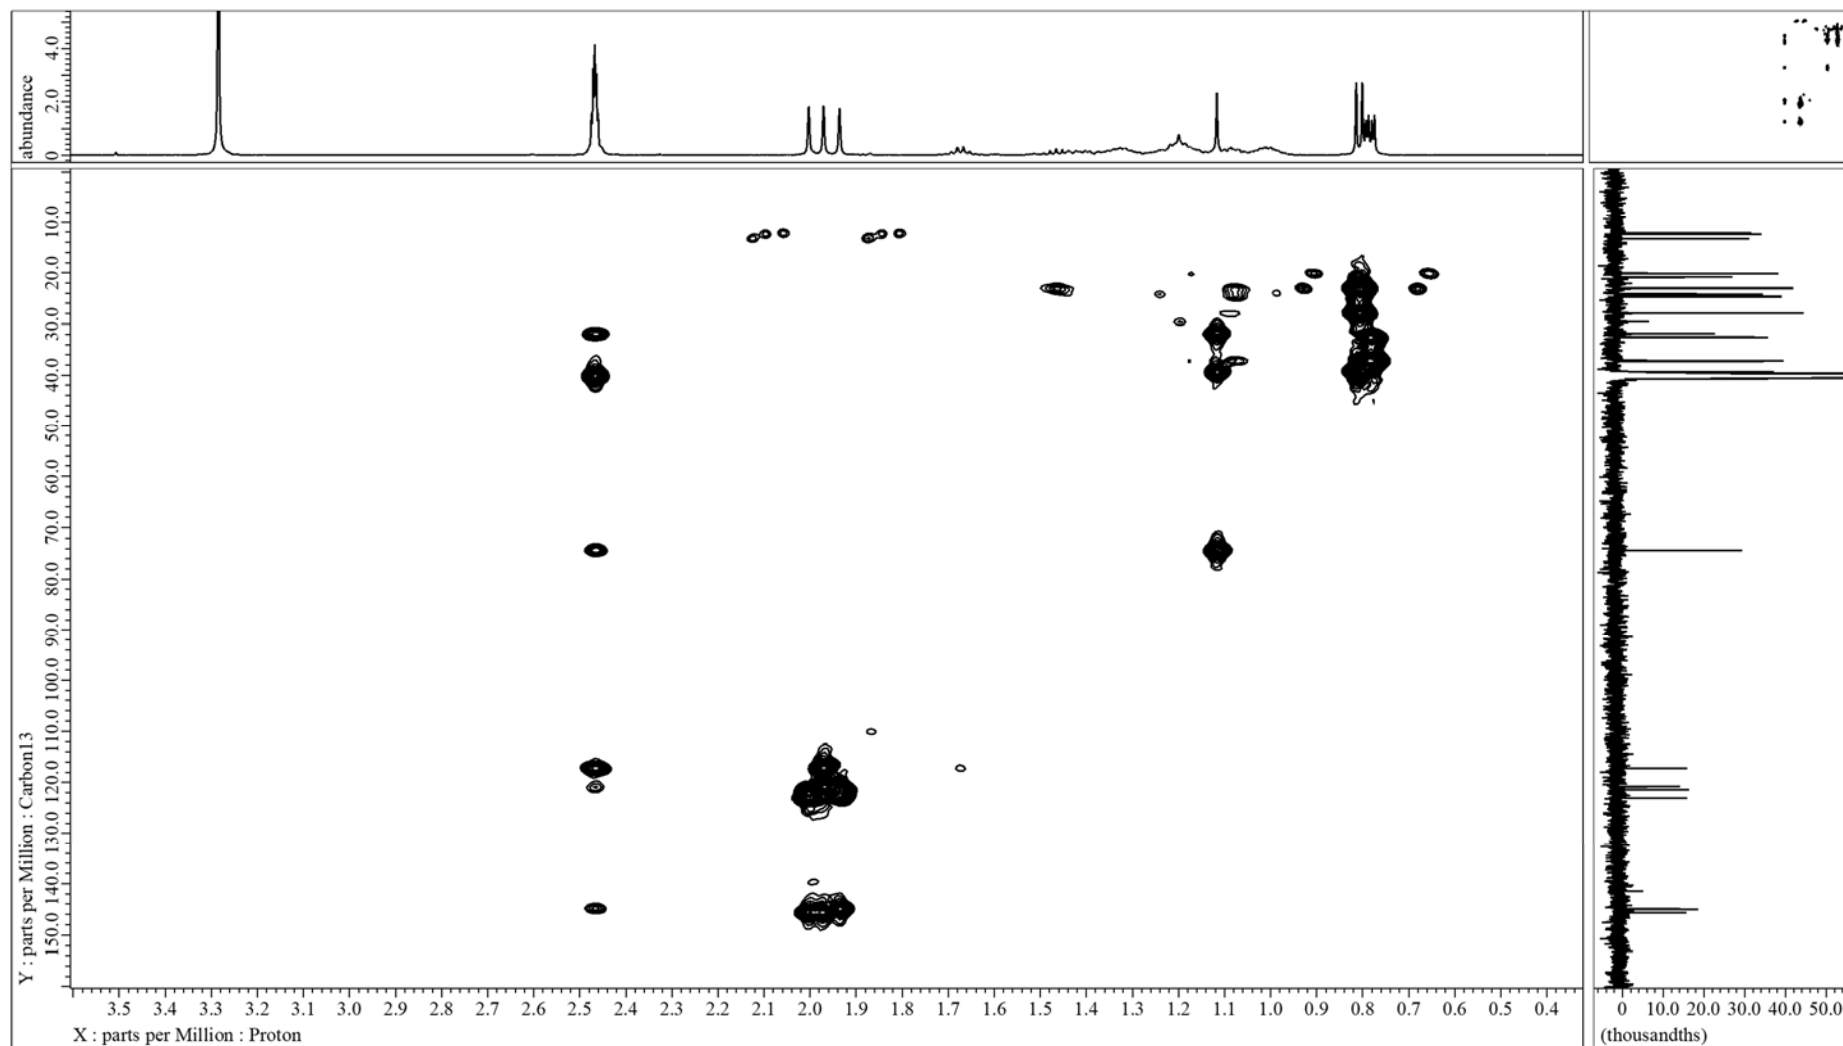

Figure S35. HMBC spectrum of 4.

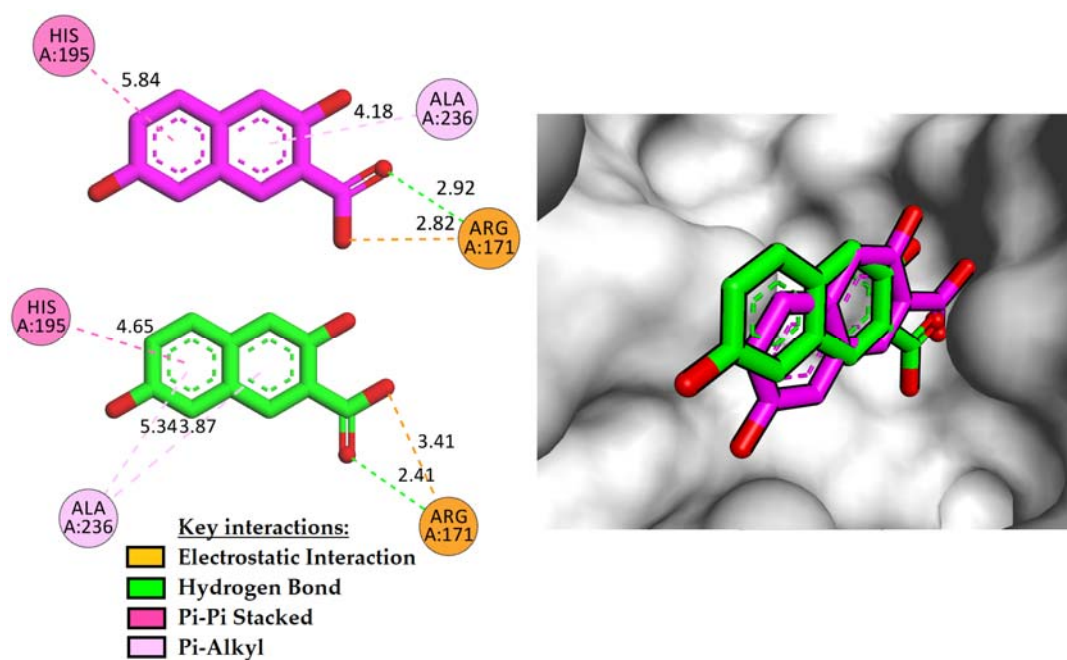

**Figure S36.** Superimposition of the crystal structure of 3,5-dihydroxy-2-naphthoic acid (C pink and O red) and the docked model (C green and O red) on *Plasmodium falciparum* lactate dehydrogenase crystal structure (PDB ID: 1U5A) with RMSD ~ 2.0 Å and their 2D interactions into the binding site. These models were generated using the Discovery Studio visualizer. The symbol A refers to the amino acids from *Pf*LDH.

## H-bond profile

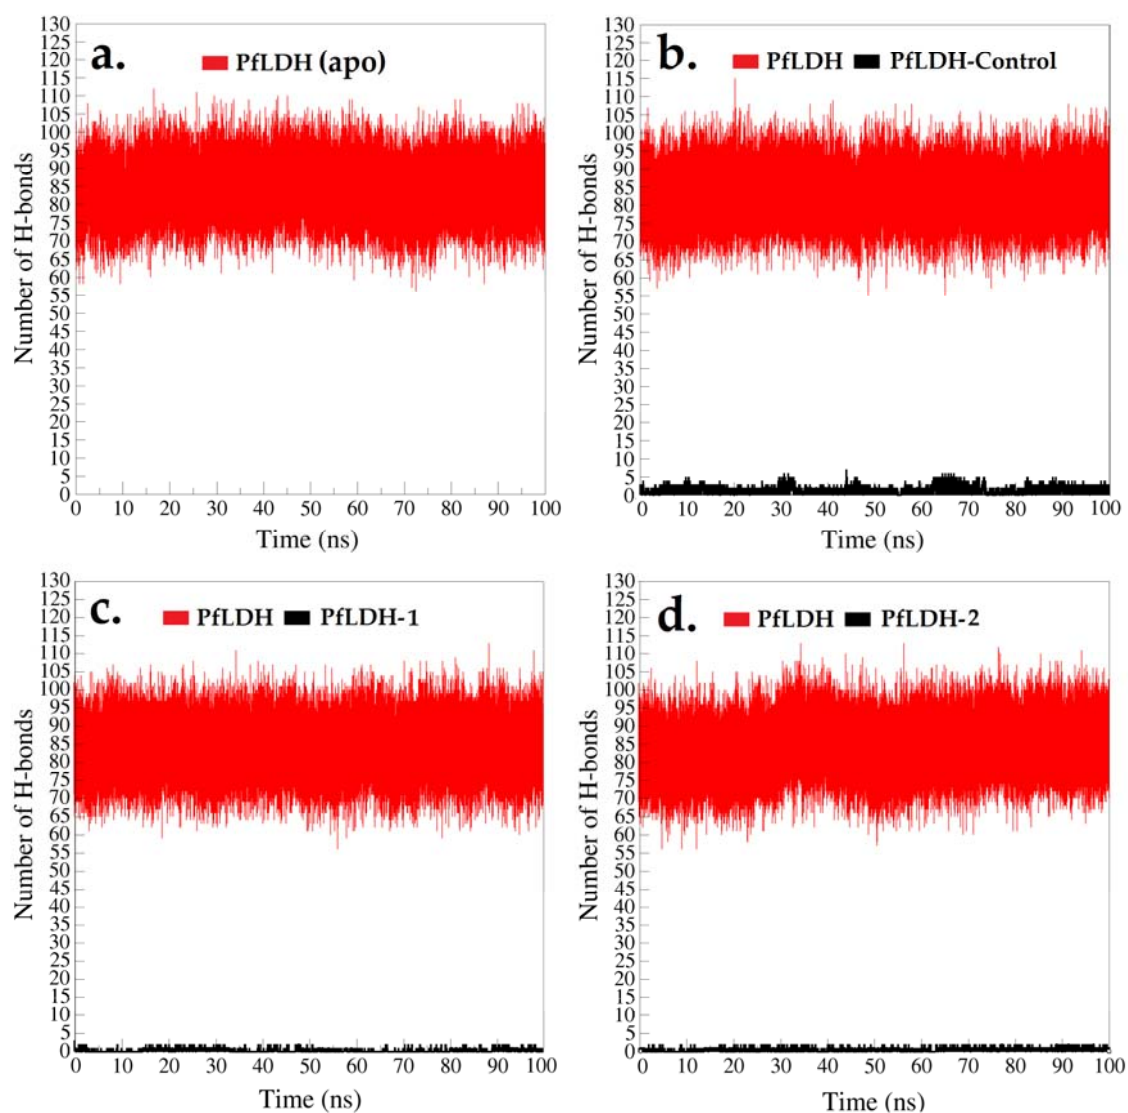

**Figure 37.** Hydrogen bond profiles obtained from MD simulations (0–100 ns) for all systems: (a) *PflDH*-apo, (b) *PflDH*- control, (c) *PflDH*-1, and (d) *PflDH*-2. The H-bond interactions between enzyme residues are represented in red, while the enzyme-ligand interactions are in black.



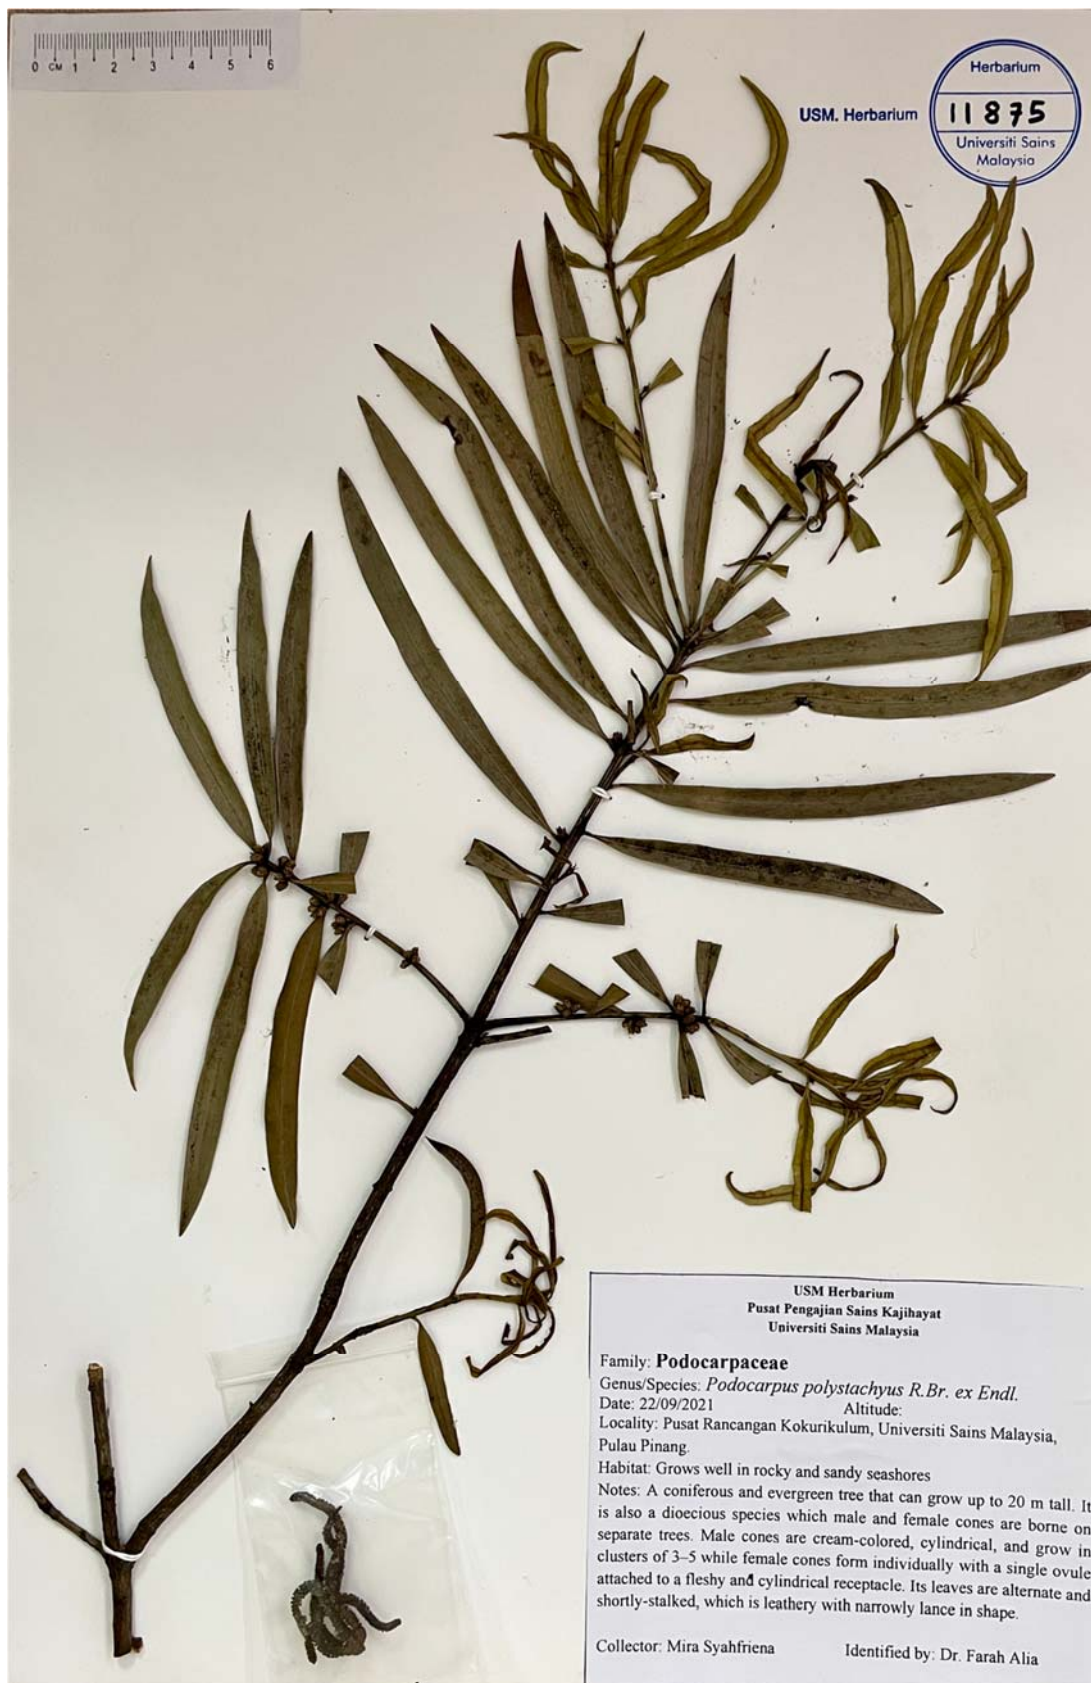

Figure S38. Specimen ID and sample report of *P. polystachyus*.

**Table S1.** Infection rates of compounds **1** and **2** in comparison to artemisinin as the reference drug.

| Compound            | Concentration | Average of infection rate (%) | Standard deviation | n=1 | n=2 | n=3 |
|---------------------|---------------|-------------------------------|--------------------|-----|-----|-----|
| <b>1</b><br>[μg/ml] | 0.01          | 106                           | 10                 | 118 | 103 | 98  |
|                     | 0.03          | 106                           | 5                  | 111 | 100 | 106 |
|                     | 0.1           | 103                           | 6                  | 98  | 101 | 109 |
|                     | 0.3           | 108                           | 7                  | 116 | 106 | 102 |
|                     | 1             | 87                            | 4                  | 87  | 83  | 91  |
|                     | 3             | 53                            | 8                  | 45  | 60  | 54  |
|                     | 10            | 20                            | 7                  | 27  | 19  | 14  |
|                     | 30            | 14                            | 2                  | 17  | 13  | 13  |
| <b>2</b><br>[μg/ml] | 0.01          | 107                           | 10                 | 118 | 103 | 99  |
|                     | 0.03          | 107                           | 4                  | 106 | 111 | 103 |
|                     | 0.1           | 110                           | 9                  | 120 | 102 | 108 |
|                     | 0.3           | 107                           | 3                  | 108 | 110 | 103 |
|                     | 1             | 106                           | 4                  | 104 | 110 | 103 |
|                     | 3             | 99                            | 5                  | 94  | 99  | 103 |
|                     | 10            | 62                            | 10                 | 54  | 58  | 73  |
|                     | 30            | 29                            | 12                 | 43  | 21  | 23  |
| Artemisinin<br>[nM] | 0.1           | 102                           | 5                  | 96  | 105 | 104 |
|                     | 0.3           | 95                            | 5                  | 100 | 92  | 92  |
|                     | 1             | 100                           | 5                  | 106 | 96  | 99  |
|                     | 3             | 97                            | 7                  | 90  | 97  | 104 |
|                     | 10            | 65                            | 2                  | 68  | 64  | 64  |
|                     | 30            | 12                            | 1                  | 11  | 13  | 12  |
|                     | 100           | 8                             | 1                  | 8   | 8   | 6   |
|                     | 300           | 6                             | 2                  | 7   | 4   | 6   |

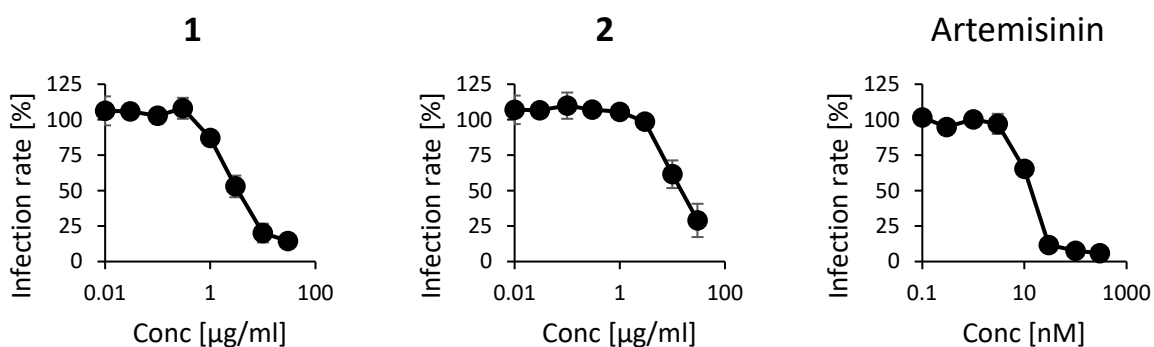

**Table S2.** IC<sub>50</sub> of compounds **1** and **2** in comparison to artemisinin as the reference drug.

| Compound    |         | Average of IC <sub>50</sub> | Standard deviation | n=1 | n=2 | n=3 |
|-------------|---------|-----------------------------|--------------------|-----|-----|-----|
| <b>1</b>    | [μg/ml] | 3.4 (12 μM)                 | 0.7                | 2.6 | 4.0 | 3.4 |
| <b>2</b>    | [μg/ml] | 15 (52 μM)                  | 2.0                | 15  | 13  | 17  |
| Artemisinin | [nM]    | 14                          | 0.4                | 14  | 14  | 13  |
